# Supplementary material for: Direct formation of 4,5-disubstituted carbazoles via regioselective dilithiation
Source: Royal Society of Chemistry journal article supplement (doi:10.1039/d1cc02892h), 2021-01-01
Supplement: d1cc02892h1.pdf [file d1cc02892h1.pdf]

## **Electronic Supplementary Information**

### **Direct formation of 4,5-disubstituted carbazoles via regioselective dilithiation**

Ian A. Pocock, Alya Alotaibi, Kesar Jagdev, Connor Prior, Gregory R. Burgess,  
Louise Male, Richard S. Grainger\*

School of Chemistry, University of Birmingham

Edgbaston, Birmingham B15 2TT, UK

[r.s.grainger@bham.ac.uk](mailto:r.s.grainger@bham.ac.uk)

## Contents

|                                                   |     |
|---------------------------------------------------|-----|
| General experimental .....                        | 2   |
| Experimental procedures and analytical data ..... | 3   |
| Electrophile and substrate screen .....           | 20  |
| X-ray crystallography .....                       | 26  |
| Copies of NMR spectra .....                       | 35  |
| References .....                                  | 109 |

## General experimental

All reagents were bought commercially from either Sigma-Aldrich (Merck), Alfa Aesar, Acros Organics, Fisher Scientific, VWR, or Fluorochem, and were used as sold unless stated. *n*BuLi was bought as a 2.5 M solution in hexanes and titrated with menthol and 'blue'.<sup>1</sup> All reactions were performed under an atmosphere of argon in oven or flame dried flasks. All solvents were bought from one of the above suppliers, and used without further drying or purification unless stated. Any solvents that were dried were stored under argon. MeOH, Toluene, THF, CH<sub>2</sub>Cl<sub>2</sub> and MeCN were dried over 3Å molecular sieves for at least 24 h before use. *N,N,N,N*-Tetramethylethylenediamine (TMEDA) was distilled from CaH<sub>2</sub> and stored over KOH. Iodomethane, dichlorodimethylsilane and dimethylgermanium dichloride were distilled prior to use. Sulfur was recrystallized from hot toluene prior to use. Silica gel on aluminium-backed TLC plates were used for reaction monitoring, supplied from Merck. The plates were visualised in UV (254 nm) and standard laboratory visualizing agents: KMnO<sub>4</sub>, anisaldehyde, vanillin, curcumin, iodine powder. Purification by flash column chromatography was performed on Sigma-Aldrich or Fluorochem silica gel, pore size 60 Å, 230–400 mesh particle size, 40–63 µm particle size. Automated flash column chromatography was performed using a Teledyne ISCO CombiFlash® NextGen 300+ utilising Interchim PuriFlash® dryload columns filled with Sigma-Aldrich or Fluorochem silica gel, pore size 60 Å, 230–400 mesh particle size, 40–63 µm particle size. Infra-red spectra were recorded neat (oil) or with the aid of an ATR-attachment (solid) on a Perkin Elmer Spectrum 100 FT-IR spectrometer, only selected absorbances ( $\nu_{\text{max}}$ , cm<sup>-1</sup>) are reported. The following abbreviations are used when describing the data: w (weak), m (medium), s (strong), br (broad). Melting points were recorded using open glass capillaries on a Gallenkamp melting point apparatus and are uncorrected. MS data are reported as *m/z* (%) (relative intensity except in cases where only the parent ion is observed). <sup>1</sup>H and <sup>13</sup>C NMR spectra were recorded on a Bruker AVIII300, Bruker AVIII400, Bruker NEO400 and Bruker AV4-500 in the solvents indicated. The solvent signals were used as references: <sup>1</sup>H NMR: residual CHCl<sub>3</sub> (7.26 ppm), CH<sub>2</sub>Cl<sub>2</sub> (5.32 ppm) and C<sub>6</sub>H<sub>6</sub> (7.16 ppm); <sup>13</sup>C NMR; CDCl<sub>3</sub> (77.16 ppm), CD<sub>2</sub>Cl<sub>2</sub> (53.84 ppm) and C<sub>6</sub>D<sub>6</sub> (128.06 ppm). <sup>11</sup>B MNR was referenced at 0 ppm using a solution of 15% BF<sub>3</sub>·OEt<sub>2</sub> (0.00 ppm) in CDCl<sub>3</sub> in a sealed capillary. <sup>19</sup>F NMR was indirectly referenced to 0 ppm (chemical shift of CCl<sub>3</sub>F) using 0.05% trifluorotoluene in CDCl<sub>3</sub> at –64.72 ppm. Coupling constants (*J*) are reported in Hz, and are reported as observed, not averaged between the two environments that share them. The following abbreviations are used to describe multiplicity in 1H-NMR: m (multiplet), s (singlet), d (doublet), t (triplet), hept (heptet), ap. (apparent). The distinction between multiplet and stack is as follows: a multiplet is a single environment that is too convoluted to establish its multiplicity correctly, a stack is where multiple environments overlap and their fidelity is lost.

## Experimental procedures and analytical data

### General Procedure 1 – *N*-silylation of carbazoles

Lithium hexamethyldisilazide (1 M in THF, 1.1 eq.) was added to a solution of functionalized carbazole in THF (0.1 M), and allowed to stir at room temperature for 15 min. Chloro(trialkyl)silane (1.2 eq.) was added and the mixture allowed to stir for 16 h. Water was added and the mixture extracted with EtOAc ( $\times 3$ ) and the combined organic extracts washed with brine. The organic layer was dried over sodium sulfate, filtered and concentrated under reduced pressure to give the crude product. The crude product was purified by flash column chromatography or recrystallization.

### General Procedure 2 – 4,5-difunctionalisation of *N*-silylated carbazoles

A solution of *n*-butyllithium in hexane (4 eq.) was added to a solution of *N*-silylated carbazole derivative in TMEDA (4 eq.) and the mixture heated to 60 °C for 6 h. The reaction mixture was cooled to –78 °C, diluted with THF (0.22 M wrt. *N*-silylated carbazole derivative), and treated with the electrophile. After 10 min the cooling bath was removed and the resulting mixture allowed to stir for 17 h. The mixture was subjected to, electrophile-dependent, work-up and purification.

### Deuteration study (Table 1, Entry 2)

*n*-Butyllithium solution in hexane (1.24 mmol) was added to a solution of **1a** (0.31 mmol) in TMEDA (1.24 mmol) and the mixture heated at 60 °C for 6 h. The reaction mixture was cooled to –78 °C, diluted with THF (1.34 mL), and treated with deuterium oxide (0.75 mL, 41.6 mmol). After 10 min the cooling bath was removed and the resulting mixture allowed to stir for 17 h. The reaction mixture was poured into HCl<sub>(aq)</sub> (1 M, 5 mL) and extracted with CH<sub>2</sub>Cl<sub>2</sub> (3  $\times$  15 mL). The combined organic extracts were washed sequentially with H<sub>2</sub>O (10 mL) and brine (10 mL), dried over sodium sulfate, filtered and concentrated under reduced pressure. The extent of deuteration of **1a** was determined by relative integration of aromatic hydrogen signals in the <sup>1</sup>H NMR.

### 9-(Triisopropylsilyl)-9H-carbazole [**1a**]<sup>2</sup>

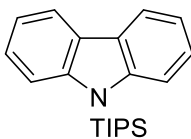

Following General Procedure 1: [From 11.93 mmol carbazole with chlorotriisopropylsilane.] Purified by recrystallization (EtOH), **1a** (3.20 g, 83%) was obtained as a colourless solid.  $R_f$  = 0.27 (hexane); mp 88 – 90 °C (EtOH);  $\nu_{\max}$  (solid,  $\text{cm}^{-1}$ ) 2945 br, 2866 br, 1592 w, 1465 m, 1442 s, 1255 m, 1195 m, 954 s, 881 m, 750 s, 720 s;  $^1\text{H}$  NMR ( $\text{CDCl}_3$ , 400 MHz)  $\delta_{\text{H}}$  8.07 (dd,  $J$  7.8 Hz, 0.8 Hz, 2 H), 7.69 (d,  $J$  8.5 Hz, 2 H), 7.36 (ddd,  $J$  8.5 Hz, 7.1 Hz, 1.4 Hz, 2 H), 7.23 (ddd,  $J$  7.7 Hz, 7.1 Hz, 0.8 Hz, 2 H), 2.00 (hept,  $J$  7.5 Hz, 3 H), 1.20 (d,  $J$  7.5 Hz, 18 H);  $^{13}\text{C}$  NMR (101 MHz)  $\delta_{\text{C}}$  145.2, 126.6, 125.4, 119.8, 119.6, 114.2, 18.7, 14.0;  $m/z$  (TOF ASAP<sup>+</sup>) calculated for  $\text{C}_{121}\text{H}_{30}\text{NSi}$   $[\text{M}+\text{H}]^+$ ; 324.2148, found 324.2142 (PPM error –1.9).

### 9-(Triethylsilyl)-9H-carbazole [**1c**]<sup>3</sup>

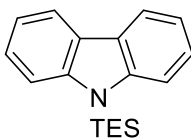

Following General Procedure 1: [From 6.04 mmol carbazole with chlorotriethylsilane.] Purified by flash column chromatography (hexane), **1c** (1.36 g, 80%) was obtained as a colourless oil that solidified on standing.  $R_f$  = 0.30 (hexane); mp 37 – 39 °C (hexane);  $\nu_{\max}$  (solid,  $\text{cm}^{-1}$ ) 2954 br, 2874 br, 1592 w, 1471 m, 1444 s, 1263 s, 1210 s, 961 s, 752 s, 722 s;  $^1\text{H}$  NMR ( $\text{CDCl}_3$ , 400 MHz)  $\delta_{\text{H}}$  8.07 (d,  $J$  7.7 Hz, 2 H), 7.50 (d,  $J$  8.3 Hz, 2 H), 7.37 (ddd,  $J$  8.4 Hz, 7.2 Hz, 1.4 Hz, 2 H), 7.23 (ddd,  $J$  7.9 Hz, 7.1 Hz, 0.8 Hz, 2 H), 1.25 (dd,  $J$  15.7 Hz, 7.8 Hz, 6 H), 1.00 (t,  $J$  7.8 Hz, 9 H);  $^{13}\text{C}$  NMR (101 MHz)  $\delta_{\text{C}}$  144.8, 126.3, 125.5, 120.1, 119.6, 113.2, 7.1, 5.4;  $m/z$  (TOF EI<sup>+</sup>) calculated for  $\text{C}_{18}\text{H}_{23}\text{NSi}$   $[\text{M}]^+$ ; 281.1600, found 281.1602 (PPM error 0.7).

### 9-(*tert*-Butyldimethylsilyl)-9H-carbazole [**1d**]<sup>4</sup>

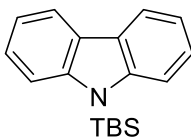

Following General Procedure 1: [From 6.01 mmol carbazole with *tert*-butyldimethylchlorosilane.] Purified by flash column chromatography (hexane), **1d** (1.64 g,

97%) was obtained as a colourless solid.  $R_f = 0.31$  (hexane); mp 116 – 118 °C (EtOH);  $\nu_{\max}$  (solid,  $\text{cm}^{-1}$ ) 2928 br, 2856 br, 1594 w, 1471 m, 1443 s, 1256 s, 1208 s, 965 s, 806 s, 751 s, 722 s;  $^1\text{H}$  NMR ( $\text{CDCl}_3$ , 400 MHz)  $\delta_{\text{H}}$  8.07 (d,  $J$  7.8 Hz, 2 H), 7.60 (d,  $J$  8.4 Hz, 2 H), 7.36 (ddd,  $J$  8.4 Hz, 7.2 Hz, 1.3 Hz, 2 H), 7.23 (ddd,  $J$  7.8 Hz, 6.9 Hz, 0.8 Hz, 2 H), 1.05 (s, 9 H), 0.75 (s, 6 H);  $^{13}\text{C}$  NMR (101 MHz)  $\delta_{\text{C}}$  145.2, 126.4, 125.3, 119.9, 119.6, 114.2, 26.7, 20.7, –1.1;  $m/z$  (TOF EI+) calculated for  $\text{C}_{18}\text{H}_{23}\text{NSi}$   $[\text{M}]^+$ ; 281.1600, found 281.1606 (PPM error 2.1).

#### 4,5-Dimethyl-9-(triisopropylsilyl)-9H-carbazole [2a]

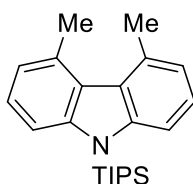

Following General Procedure 2: [From 0.78 mmol **1a**, using iodomethane as the electrophile (8 eq.).] The reaction mixture was poured into sat.  $\text{NH}_4\text{Cl}_{(\text{aq})}$  (15 mL) and extracted with  $\text{CH}_2\text{Cl}_2$  (2  $\times$  15 mL). The combined organic extracts were washed sequentially with  $\text{H}_2\text{O}$  (15 mL) and brine (15 mL), dried over sodium sulfate, filtered, and concentrated under reduced pressure to give an orange oil. The orange oil was purified by flash column chromatography (hexane) to give **2a** (103.8 mg, 38%) as a colourless solid.  $R_f = 0.19$  (hexane); mp 58 – 60 °C (hexane);  $\nu_{\max}$  (solid,  $\text{cm}^{-1}$ ) 2946 br, 2866 br, 1576 w, 1446 m, 1412 s, 1278 s, 1058 m, 983 m, 884 s, 771 s;  $^1\text{H}$  NMR ( $\text{CDCl}_3$ , 400 MHz)  $\delta_{\text{H}}$  7.58 (d,  $J$  8.4 Hz, 2 H), 7.24 (dd,  $J$  8.4 Hz, 7.3 Hz, 2 H), 7.02 (d,  $J$  7.2 Hz, 2 H), 2.98 (s, 6 H), 2.00 (hept,  $J$  7.5 Hz, 3 H), 1.17 (d,  $J$  7.5 Hz, 18 H);  $^{13}\text{C}$  NMR (101 MHz)  $\delta_{\text{C}}$  146.3, 131.7, 126.0, 124.6, 123.2, 111.8, 26.6, 18.8, 14.0;  $m/z$  (TOF ASAP+) calculated for  $\text{C}_{23}\text{H}_{34}\text{NSi}$   $[\text{M}+\text{H}]^+$ ; 352.2461, found 352.2465 (PPM error 1.2).

#### (9-(Triisopropylsilyl)-9H-carbazole-4,5-diyl)dimethanol [3a] and (9-(Triisopropylsilyl)-9H-carbazol-4-yl)methanol [22a]

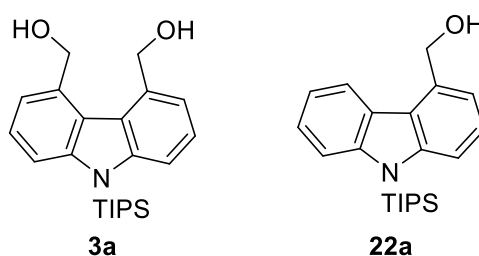

Following General Procedure 2: [From 6.46 mmol **1a**, using paraformaldehyde as the electrophile (10 eq.).] The reaction mixture was poured into sat.  $\text{NH}_4\text{Cl}_{(\text{aq})}$  (100 mL) and

extracted with EtOAc (3 × 80 mL). The combined organic extracts were washed with brine (3 × 80 mL), dried over magnesium sulfate, filtered, and concentrated under reduced pressure to give an orange oil. The orange oil was purified by flash column chromatography (hexane/EtOAc; 3:1 to 1:1) to give **22a** (524 mg, 23%) as a yellow oil followed by **3a** (1.05 g, 43%) as an off-white crystalline solid.

**Analytical data for [3a]**  $R_f$  = 0.30 (hexane:EtOAc, 1:1); mp 95 – 96 °C (hexane);  $\nu_{\max}$  (solid,  $\text{cm}^{-1}$ ) 3304 br, 2948 m, 2869 m, 1604 w, 1585 m, 1464 m, 1420 s, 1272 s, 1236 m, 1037 w, 1010 s, 982 m, 883 m, 846 m, 778 s, 728 s, 719 s, 682 s;  $^1\text{H}$  NMR ( $\text{CDCl}_3$ , 400 MHz)  $\delta_{\text{H}}$  7.74 (dd,  $J$  8.4 Hz, 0.9 Hz, 2 H), 7.34 (dd,  $J$  8.4 Hz, 7.3 Hz, 2 H), 7.24 (dd,  $J$  7.2 Hz, 0.8 Hz, 2 H), 5.22 (s, 4 H), 3.47 (br s, 2 H) 1.99 (hept,  $J$  7.5 Hz, 3 H), 1.17 (d,  $J$  7.5 Hz, 18 H);  $^{13}\text{C}$  NMR (101 MHz)  $\delta_{\text{C}}$  146.7, 134.7, 124.8, 123.8, 122.9, 114.1, 67.0, 18.6, 13.9;  $m/z$  (TOF ES+) calculated for  $\text{C}_{23}\text{H}_{33}\text{NO}_2\text{SiNa}$   $[\text{M}+\text{Na}]^+$ ; 406.2178, found 406.2190 (PPM error –3.0).

**Analytical data for [22a]**  $R_f$  = 0.31 (hexane:EtOAc, 3:1);  $\nu_{\max}$  (oil,  $\text{cm}^{-1}$ ) 3357 br, 2949 m, 2868 m, 1725 w, 1588 w, 1450 s, 1427 s, 1265 s, 1209 s, 1002 s, 881 s, 726 s, 682 m;  $^1\text{H}$  NMR ( $\text{CDCl}_3$ , 400 MHz)  $\delta_{\text{H}}$  8.24 (dd,  $J$  7.9 Hz, 0.7 Hz, 1 H), 7.76 (d,  $J$  8.5 Hz, 1 H), 7.71 (d,  $J$  8.3 Hz, 1 H), 7.42 – 7.34 (stack, 2 H), 7.30–7.25 (stack, 2 H), 5.29 (s, 2 H), 2.02 (hept,  $J$  7.5 Hz, 3 H), 1.21 (d,  $J$  7.6 Hz, 18 H);  $^{13}\text{C}$  NMR (101 MHz)  $\delta_{\text{C}}$  145.7, 145.4, 134.9, 125.8, 125.2, 125.0, 124.0, 123.0, 120.0, 119.3, 114.1, 114.0, 64.7, 18.8, 14.0;  $m/z$  (TOF MS  $\text{Cl}^+$ ) calculated for  $\text{C}_{22}\text{H}_{35}\text{N}_2\text{OSi}$   $[\text{M}+\text{NH}_4]^+$ ; 371.2519, found 371.2533 (PPM error 3.8)

#### 4-(Triisopropylsilyl)-4H-oxepino[3,4,5,6-def]carbazole-8,10-dione [4a]

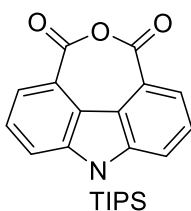

Following General Procedure 2: [From, 4.75 mmol **1a**, using carbon dioxide (dry ice) as the electrophile (>100 eq.).] The reaction mixture was poured into concentrated HCl (37 w/w%, 8 mL) at 0 °C and allowed to stir at this temperature for 1 h prior to diluting with  $\text{H}_2\text{O}$  (80 mL) and extracting with  $\text{CH}_2\text{Cl}_2$  (3 × 80 mL). The combined organic extracts were washed with brine (3 × 80 mL), dried over sodium sulfate, filtered, and concentrated under reduced pressure to give a brown solid. The brown solid was purified by trituration with hexane, to give **4a** (1.17 g, 63%) as a beige solid.  $R_f$  = 0.29 ( $\text{CH}_2\text{Cl}_2$ :MeOH, 9:1); mp 207 – 209 °C

(hexane);  $\nu_{\max}$  (solid,  $\text{cm}^{-1}$ ) 2951 br, 2869 br, 1692 s, 1421 m, 1302 s, 1263 s, 1028 w, 880 w, 754 w, 735 w;  $^1\text{H}$  NMR ( $\text{CDCl}_3$ , 400 MHz)  $\delta_{\text{H}}$  7.96 (d,  $J$  8.5 Hz, 2H), 7.77 (d,  $J$  7.3 Hz, 2 H), 7.45 (dd,  $J$  8.4 Hz, 7.6 Hz, 2 H), 2.02 (hept,  $J$  7.5 Hz, 3 H), 1.22 (d,  $J$  7.5 Hz, 18 H);  $^{13}\text{C}$  NMR (101 MHz)  $\delta_{\text{C}}$  176.6, 146.5, 127.5, 125.2, 122.2, 122.0, 118.4, 18.7, 14.1;  $m/z$  (TOF ES+) calculated for  $\text{C}_{23}\text{H}_{28}\text{NO}_3\text{Si}$   $[\text{M}+\text{H}]^+$ ; 394.1838, found 394.1839 (PPM error 0.3).

#### 8,9,10,11-Tetrafluoro-4-(triisopropylsilyl)-4H-naphtho[1,2,3,4-def]carbazole [5a]

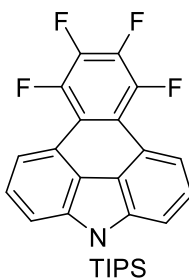

Following General Procedure 2: [From, 0.65 mmol **1a**, using hexafluorobenzene as the electrophile (8 eq).] The mixture was poured into ice/water (8 mL) and extracted with EtOAc (3  $\times$  10 mL). The combined organic extracts were washed with brine (20 mL), dried over sodium sulfate, filtered, and concentrated under reduced pressure to give an orange solid. The crude material was purified by automated flash column chromatography (hexane) to give **5a** (103.6 mg, 34%) as a white solid.  $R_f$  = 0.31 (hexane); mp 207 – 208  $^{\circ}\text{C}$  (hexane);  $\nu_{\max}$  (solid,  $\text{cm}^{-1}$ ) 2950 m, 2870 m, 1570 m, 1489 s, 1451 s, 1369 m, 1256 m, 1112 m, 952 s, 864 s, 778 s, 767 s, 718 s;  $^1\text{H}$  NMR ( $\text{CDCl}_3$ , 500 MHz)  $\delta_{\text{H}}$  8.45 (d,  $J$  7.7 Hz, 2 H), 7.88 (d,  $J$  8.0 Hz, 2 H), 7.81 (t,  $J$  7.9 Hz, 2 H), 2.12 (hept,  $J$  7.5 Hz, 3 H), 1.27 (d,  $J$  7.5 Hz, 18 H).  $^{13}\text{C}$  NMR ( $\text{CDCl}_3$ , 126 MHz)  $\delta_{\text{C}}$  147.4 (dm,  $J$  250.5 Hz), 144.0, 139.2 (dm,  $J$  253.1 Hz), 127.5, 124.0, 122.2, 117.9 (m), 117.5 (m), 112.6, 18.6, 13.8;  $^{19}\text{F}$  NMR ( $\text{CDCl}_3$ , 471 MHz)  $\delta$  -139.3 (d,  $J$  16.5 Hz), -158.1 (d,  $J$  16.4 Hz);  $m/z$  (TOF ASAP+) calculated for  $\text{C}_{27}\text{H}_{28}\text{NSiF}_4$   $[\text{M}+\text{H}]^+$ ; 470.1927, found 470.1937 (PPM error 2.1).

#### 4,5-Dichloro-9H-carbazole [6b]

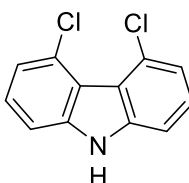

Following General Procedure 2: [From 0.64 mmol **1a**, using hexachloroethane as the electrophile (10 eq.).] The reaction mixture was poured into H<sub>2</sub>O (20 mL) and extracted with EtOAc (3 × 20 mL). The combined organic extracts were washed with 10 w/w% NaHCO<sub>3(aq)</sub> (40 mL), dried over magnesium sulfate, filtered, and concentrated under reduced pressure to give a brown oil. The brown oil was dissolved in THF (6.4 mL), treated with tetrabutylammonium fluoride solution (1.0 M in THF, 0.96 mL, 0.96 mmol), and allowed to stir for 15 min at rt. The solvent was removed under reduced pressure and the residue dissolved in EtOAc (10 mL). The mixture was sequentially washed with H<sub>2</sub>O (2 × 10 mL) and brine (2 × 10 mL), and the organic extracts dried over sodium sulfate, filtered, and concentrated under reduced pressure to give a brown oil. The brown oil was purified by automated flash column chromatography (hexane/EtOAc 95:5) to give 4-chloro-9H-carbazole<sup>5</sup> (16.4 mg, 13%) as yellow solid followed by **6b** (52.6 mg, 35%) as a beige crystalline solid. *R*<sub>f</sub> = 0.30 (hexane:EtOAc, 85:15); mp 173 – 175 °C (hexane); *v*<sub>max</sub> (solid, cm<sup>-1</sup>) 3417 s, 2957 w, 2925 w, 2855 m, 1603 m, 1561 m, 1493 w, 1476 m, 1427 s, 1380 w, 1305 s, 1148 m, 1133 m, 934 m, 845 w, 765 s, 712 s; <sup>1</sup>H NMR (CDCl<sub>3</sub>, 400 MHz) *δ*<sub>H</sub> 8.33 (br s, 1 H), 7.35 – 7.33 (m, 4 H), 7.33 – 7.29 (m, 2 H); <sup>13</sup>C NMR (101 MHz) *δ*<sub>C</sub> 141.3, 128.1, 127.0, 123.0, 119.9, 109.2; *m/z* (TOF ES+) calculated for C<sub>12</sub>H<sub>7</sub><sup>35</sup>Cl<sub>2</sub>N [M]<sup>+</sup>; 234.9956, found 234.9955 (PPM error -0.4).

#### 4-(Triisopropylsilyl)-4H-[1,2,7]oxadiborepino[3,4,5,6-def]carbazole-8,10-diol [**7a**]

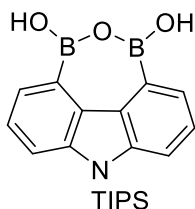

Following General Procedure 2: [From 4.67 mmol **1a**, using trimethyl borate as the electrophile (10 eq.).] The reaction mixture was poured into HCl<sub>(aq)</sub> (3 M, 80 mL) and allowed to stir for 3 h at rt. The mixture was diluted with H<sub>2</sub>O (100 mL) and extracted with EtOAc (3 × 100 mL). The combined organic extracts were washed with brine (100 mL), dried over sodium sulfate, filtered, and concentrated under reduced pressure. The crude material was purified by trituration using hexane to give **7a** (1.21 g, 66%) as a beige solid. *R*<sub>f</sub> = 0.30 (hexane:EtOAc, 7:3; visualized using curcumin dip,<sup>6</sup> appears as orange spot with heating); mp 175 – 177 °C (hexane); *v*<sub>max</sub> (solid, cm<sup>-1</sup>) 2947 br, 2867 br, 1595 w, 1294 w, 1331 w, 1258 s, 1016 w, 957 w, 919 w, 879 s, 732 s, 638 m; <sup>1</sup>H NMR (CDCl<sub>3</sub>, 400 MHz) *δ*<sub>H</sub> 7.93 (app d, *J* 7.8 Hz, 4 H), 7.49 (app t, *J* 7.8 Hz, 2 H), 4.74 (s, 2 H), 2.03 (hept, *J* 7.5 Hz, 3 H), 1.20 (d, *J* 7.5 Hz, 18 H); <sup>13</sup>C NMR (101 MHz) *δ*<sub>C</sub> 145.0, 132.2, 127.8, 125.2, 117.4, 18.7, 14.0, missing one quaternary

carbon signal;  $^{11}\text{B}$  NMR (128.37 MHz)  $\delta_{\text{B}}$  28.5;  $m/z$  (TOF ES+) calculated for  $\text{C}_{21}\text{H}_{30}^{10}\text{B}^{11}\text{BNO}_3\text{Si}$   $[\text{M}+\text{H}]^+$ ; 393.2217, found 393.2228 (PPM error 2.8).

#### 8,8-Dimethyl-4-(triisopropylsilyl)-4,8-dihydrosilolo[2,3,4,5-def]carbazole [8a]

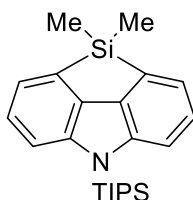

Following General Procedure 2: [From 0.31 mmol **1a**, using dichlorodimethylsilane as the electrophile (4 eq.).] The reaction mixture was poured into sat.  $\text{NaHCO}_3(\text{aq})$  (20 mL) and extracted with  $\text{CH}_2\text{Cl}_2$  (2  $\times$  10 mL). The combined organic extracts were washed with brine (20 mL), dried over sodium sulfate, filtered and concentrated under reduced pressure to give an orange oil. The orange oil was purified by flash column chromatography (hexane) to give **8a** (86.8 mg, 74%) as a colourless solid.  $R_f$  = 0.29 (hexane); mp 115 – 117 °C (EtOH);  $\nu_{\text{max}}$  (solid,  $\text{cm}^{-1}$ ) 2948 br, 2867 br, 1603 w, 1499 w, 1439 w, 1388 w, 1204 m, 1145 m, 1014 w, 870 m, 840 s, 759 s, 645 s;  $^1\text{H}$  NMR ( $\text{CDCl}_3$ , 400 MHz)  $\delta_{\text{H}}$  7.46 (dd,  $J$  7.6 Hz, 0.6 Hz, 2 H), 7.36–7.30 (stack, 4 H), 1.94 (hept,  $J$  7.6 Hz, 3 H), 1.20 (d,  $J$  7.6 Hz, 18 H), 0.63 (s, 6 H);  $^{13}\text{C}$  NMR (101 MHz)  $\delta_{\text{C}}$  141.6, 140.5, 132.9, 127.2, 123.5, 115.5, 18.5, 13.5, –1.5;  $m/z$  (TOF ASAP+) calculated for  $\text{C}_{23}\text{H}_{33}\text{NSiNa}$   $[\text{M}]^+$ ; 402.2044, found 402.2037 (PPM error 1.8).

#### 8,8-Dimethyl-4-(triisopropylsilyl)-4,8-dihydrogermololo[2,3,4,5-def]carbazole [9a]

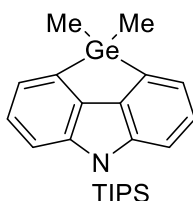

Following General Procedure 2: [From 0.77 mmol **1a**, using dimethylgermanium dichloride as the electrophile (4 eq.).] The reaction mixture was poured into sat.  $\text{NaHCO}_3(\text{aq})$  (30 mL) and extracted with  $\text{CH}_2\text{Cl}_2$  (3  $\times$  10 mL). The combined organic extracts were washed with brine (30 mL), dried over sodium sulfate, filtered, and concentrated under reduced pressure to give a red oil. The red oil was purified by flash column chromatography (hexane) to give **9a** (125.8 mg, 39%) as a colourless solid.  $R_f$  = 0.22 (hexane); mp 114 – 116 °C (hexane);  $\nu_{\text{max}}$  (solid,  $\text{cm}^{-1}$ ) 2941 br, 2865 br, 1393 w, 1220 w, 990 w, 867 w, 721 m, 648 m;  $^1\text{H}$  NMR ( $\text{CDCl}_3$ , 400

MHz)  $\delta_{\text{H}}$  7.45 (dd,  $J$  7.3 Hz, 1.2 Hz, 2 H), 7.36–7.30 (stack, 4 H), 1.94 (hept,  $J$  7.6 Hz, 3 H), 1.20 (d,  $J$  7.6 Hz, 18 H), 0.80 (s, 6 H);  $^{13}\text{C}$  NMR (101 MHz)  $\delta_{\text{C}}$  140.8, 140.7, 135.3, 127.1, 123.5, 114.7, 18.6, 13.5, –0.4;  $m/z$  (TOF ASAP<sup>+</sup>) calculated for  $\text{C}_{23}\text{H}_{32}\text{NSi}^{72}\text{Ge}$   $[\text{M}]^+$ ; 422.1703, found 422.1713 (PPM error 2.4).

### 9-(Triisopropylsilyl)-9H-[1,2]dithiino[3,4,5,6-def]carbazole **10a**

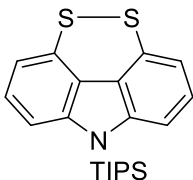

Following General Procedure 2: [From 3.1 mmol **1a**, using sulfur as the electrophile (8 eq).] The reaction mixture was poured into  $\text{NaOH}_{(\text{aq})}$  (2 M, 100 mL) and extracted with  $\text{CH}_2\text{Cl}_2$  (3  $\times$  50 mL). The combined organic extracts were washed sequentially with  $\text{H}_2\text{O}$  (50 mL) and brine (50 mL), dried over sodium sulfate, filtered, and concentrated under reduced pressure to give an orange oil. The orange oil was purified by flash column chromatography (hexane) to give **10a** (638.1 mg, 54%) as a yellow solid.

Following General Procedure 2 followed by sodium borohydride reduction of di:trisulfide mixture: [From 6.2 mmol **1a**, using sulfur as the electrophile (8 eq).] The reaction mixture was poured into  $\text{HCl}_{(\text{aq})}$  (1 M, 50 mL) and stirred rapidly, open to the air, for 20 min. The mixture was partitioned and the aqueous layer extracted with  $\text{CH}_2\text{Cl}_2$  (4  $\times$  50 mL). The combined organic extracts were washed with brine (50 mL), dried over sodium sulfate, filtered, and concentrated under reduced pressure to give an orange oil. The orange oil was partially purified by flash column chromatography (hexane) to give a mixture of **10a:11a** (1.42 g, 1:~2.2 ratio by integration of  $^1\text{H}$  NMR\*) as a yellow oil that solidified on standing. The yellow solid was dissolved in  $\text{THF:EtOH}$  (1:1, 0.1 M, 35 mL), treated with sodium borohydride (661.1 mg, 17.5 mmol) and the resulting mixture heated at 50  $^\circ\text{C}$  for 3.5 h. The mixture was cooled to rt and treated with  $\text{NaOH}_{(\text{aq})}$  (1 M, 50 mL). The mixture was partitioned and the aqueous layer extracted with  $\text{CH}_2\text{Cl}_2$  (3  $\times$  75 mL). The combined organic extracts were concentrated under reduced pressure and the residue dissolved in  $\text{CH}_2\text{Cl}_2$  (100 mL). The solution was washed sequentially with  $\text{H}_2\text{O}$  (100 mL) and brine (100 mL), dried over sodium sulfate, filtered, and concentrated under reduced pressure to give **10a** (1.05 g, 44% over 2 steps) as a yellow solid.

\*Trisulfide **11a** additionally identified by low resolution mass spectroscopy.

**Analytical data for [10a]**  $R_f$  = 0.25 (hexane); mp 141 – 143 °C (hexane);  $\nu_{\max}$  (solid,  $\text{cm}^{-1}$ ) 2946 br, 2866 br, 1610 w, 1556 w, 1464 m, 1425 s, 1253 s, 1183 m, 1151 m, 997 s, 880 s, 764 s, 719 s;  $^1\text{H}$  NMR ( $\text{CDCl}_3$ , 400 MHz)  $\delta_{\text{H}}$  7.47 (d,  $J$  8.5 Hz, 2 H), 7.28 (dd,  $J$  8.5 Hz, 7.5 Hz, 2 H), 7.00 (d,  $J$  7.4 Hz, 2 H), 1.94 (hept,  $J$  7.5 Hz, 3 H), 1.19 (d,  $J$  7.5 Hz, 18 H);  $^{13}\text{C}$  NMR (101 MHz)  $\delta_{\text{C}}$  144.2, 127.5, 124.2, 123.5, 116.9, 113.8, 18.6, 13.8;  $m/z$  (TOF ASAP+) calculated for  $\text{C}_{21}\text{H}_{28}\text{NSiS}_2$   $[\text{M}+\text{H}]^+$ ; 386.1432, found 386.1436 (PPM error 1.0).

**Peaks assignable to trisulfide [11a] in  $^1\text{H}$  NMR prior to sodium borohydride reduction**

$^1\text{H}$  NMR ( $\text{CDCl}_3$ , 400 MHz)  $\delta_{\text{H}}$  7.77 (dd,  $J$  8.2 Hz, 1.3 Hz, 2 H), 7.35 (dd,  $J$  7.5 Hz, 1.2 Hz, 2 H), 7.30 (dd,  $J$  8.2 Hz, 7.5 Hz, 2 H), 1.99 (hept,  $J$  7.4 Hz, 3 H), 2.01 (d,  $J$  7.4 Hz, 18 H).

**9-(Triisopropylsilyl)-9H-[1,2]dithiino[3,4,5,6-def]carbazole [10b]**

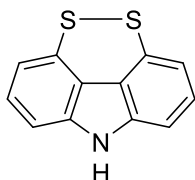

Tetrabutylammonium fluoride solution (1 M in THF, 6.48 mL, 6.48 mmol) was added to a solution of **10a** (1.00 g, 2.59 mmol) in THF (26 mL). The mixture was allowed to stir for 15 min prior to concentrating under reduced pressure. The residue was dissolved in  $\text{CH}_2\text{Cl}_2$  (50 mL) and washed sequentially with water (2  $\times$  10 mL) and brine (20 mL). The combined organic extracts were dried over magnesium sulfate, filtered, and concentrated under reduced pressure to give a red solid. The red solid was purified by flash column chromatography (hexane:EtOAc, 9:1) to give **10b** (389 mg, 66%) as a yellow solid;  $R_f$  = 0.08 (hexane:EtOAc, 9:1); mp 98 – 100 °C (EtOH);  $\nu_{\max}$  (solid,  $\text{cm}^{-1}$ ) 3388 br, 1709 m, 1594 m, 1420 m, 1317 m, 1152 m, 761 s, 709 s;  $^1\text{H}$  NMR ( $\text{CDCl}_3$ , 300 MHz)  $\delta_{\text{H}}$  8.01 (br s, 1 H), 7.33 (dd,  $J$  8.1 Hz, 7.5 Hz, 2 H), 7.22 (d,  $J$  7.8 Hz, 2 H), 6.99 (dd,  $J$  7.4 Hz, 0.4 Hz, 2 H);  $^{13}\text{C}$  NMR (101 MHz)  $\delta_{\text{C}}$  138.0, 128.1, 124.4, 120.9, 116.5, 110.2;  $m/z$  (TOF AP+) calculated for  $\text{C}_{12}\text{H}_8\text{NS}_2$   $[\text{M}]^+$ ; 230.0098, found 230.0097 (PPM error –0.4).

**9-(Triisopropylsilyl)-9H-[1,2]diselenino[3,4,5,6-def]carbazole [12a]**

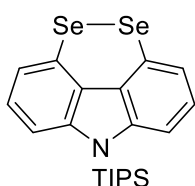

Following General Procedure 2: [From 2.5 mmol **1a**, using selenium as the electrophile (8 eq.).] The reaction mixture was poured into H<sub>2</sub>O (50 mL) and extracted with Et<sub>2</sub>O (3 × 40 mL). The combined organic extracts were dried over magnesium sulfate, filtered, and concentrated under reduced pressure. The crude material was purified by flash column chromatography (hexane) to give **12a** (512 mg, 43%) as a dark burgundy crystalline solid. *R*<sub>f</sub> = 0.43 (hexane); mp 140 – 141 °C (hexane);  $\nu_{\text{max}}$  (solid, cm<sup>-1</sup>) 2946 br, 2864 br, 1578 w, 1460 m, 1420 s, 1256 s, 1185 m, 989 s, 881 m, 765 s, 713 s, 648 s, 586s; <sup>1</sup>H NMR (CDCl<sub>3</sub>, 400 MHz)  $\delta_{\text{H}}$  7.53 (dd, *J* 8.5 Hz, 0.5 Hz, 2 H), 7.29 (dd, *J* 8.5 Hz, 7.4 Hz, 2 H), 7.16 (dd, *J* 7.4 Hz, 0.6 Hz, 2 H), 1.99 (hept, *J* 7.6 Hz, 3 H), 1.22 (d, *J* 7.5 Hz, 18 H); <sup>13</sup>C NMR (101 MHz)  $\delta_{\text{C}}$  144.8, 127.2, 125.5, 119.4, 116.6, 113.9, 18.7, 13.9; <sup>77</sup>Se NMR (76 MHz, CDCl<sub>3</sub>) 244.6; *m/z* (TOF ASAP+) calculated for C<sub>21</sub>H<sub>28</sub>NSi<sup>80</sup>Se<sub>2</sub> [M+H]<sup>+</sup>; 482.0321, found 482.0328 (PPM error 1.5).

### 9H-[1,2]diselenino[3,4,5,6-def]carbazole [**12b**]

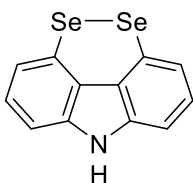

Tetrabutylammonium fluoride solution (1 M in THF, 7.51 mL, 7.51 mmol) was added to a solution of **12a** (361.0 mg, 7.50 mmol) in THF (15 mL). The mixture was allowed to stir for 2.5 h then treated with H<sub>2</sub>O (10 mL) and extracted with Et<sub>2</sub>O (2 × 20 mL). The combined organic extracts were dried over magnesium sulfate, filtered, and concentrated under reduced pressure to give **12b** (210 mg, 86%) as a red crystalline solid. *R*<sub>f</sub> = 0.43 (hexane:Et<sub>2</sub>O, 4:1); mp 143 – 144 °C (hexane);  $\nu_{\text{max}}$  (solid, cm<sup>-1</sup>) 3392 br s, 1586 s, 1427 s, 1421 s, 1378 w, 1306 s, 1275 m, 1189 w, 1169 s, 1134 w, 888 m, 865 m, 757 s, 710 s; <sup>1</sup>H NMR (CDCl<sub>3</sub>, 400 MHz)  $\delta_{\text{H}}$  8.04 (br s, 1 H), 7.32 (dd, *J* 8.1 Hz, 7.4 Hz, 2 H), 7.23 (dd, *J* 8.1 Hz, 0.7 Hz, 2 H), 7.13 (dd, *J* 7.4 Hz, 0.7 Hz, 2 H); <sup>13</sup>C NMR (101 MHz)  $\delta_{\text{C}}$  138.6, 128.0, 122.9, 118.7, 116.8, 110.3; <sup>77</sup>Se NMR (76 MHz, CDCl<sub>3</sub>) 265.6; *m/z* (TOF EI<sup>+</sup>) calculated for C<sub>12</sub>H<sub>8</sub>N<sup>76</sup>Se<sup>78</sup>Se [M+H]<sup>+</sup>; 319.9022, found 319.9031 (PPM error 2.8).

**1,7-Diiodo-8,8-dimethyl-4-(triisopropylsilyl)-4,8-dihydrosilolo[2,3,4,5-def]carbazole**  
**[13a]**

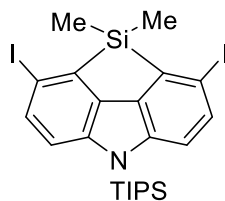

*N*-Iodosuccinimide (130.1 mg, 0.58 mmol) was added to a solution of **8a** (100.4 mg, 0.26 mmol) in acetic acid (2.6 mL) and the resultant mixture allowed to stir for 22 h. Water (10 mL) was added to the mixture and extracted with CH<sub>2</sub>Cl<sub>2</sub> (3 × 10 mL). The combined organic extracts were washed with brine (10 mL), dried over sodium sulfate, filtered, and concentrated under reduced pressure to give a beige solid. The beige solid was purified by automated flash column chromatography (hexane) to give **13a** (117.7 mg, 70%) as a colourless solid. *R*<sub>f</sub> = 0.61 (hexane); mp 162 – 164 °C (hexane);  $\nu_{\text{max}}$  (solid, cm<sup>-1</sup>) 2946 br, 2865 br, 1597 w, 1482 w, 1459 w, 1436 m, 1421 m, 1391 m, 1286 w, 1241 m, 1214 m, 1189 s, 1151 m, 1070 w, 1013 s, 991 m, 882 m, 841 s, 800 s, 841 s, 783 s, 748 s, 701 s, 674 s; <sup>1</sup>H NMR (CDCl<sub>3</sub>, 400 MHz)  $\delta_{\text{H}}$  7.53 (d, *J* 8.3 Hz, 2 H), 7.19 (d, *J* 8.3 Hz, 2 H), 1.85 (hept, *J* 7.5 Hz, 3 H), 1.17 (d, *J* 7.5 Hz, 18 H), 0.68 (s, 6H); <sup>13</sup>C NMR (101 MHz)  $\delta_{\text{C}}$  142.7, 141.4, 140.1, 135.7, 118.1, 87.5, 18.4, 13.3, –4.3; *m/z* (TOF ASAP+) calculated for C<sub>23</sub>H<sub>32</sub>NSi<sub>2</sub>I<sub>2</sub> [M+H]<sup>+</sup>; 632.0163, found 632.0168 (PPM error 0.8).

**1,7-Dibromo-8,8-dimethyl-4-(triisopropylsilyl)-4,8-dihydrosilolo[2,3,4,5-def]carbazole**  
**[14a]**

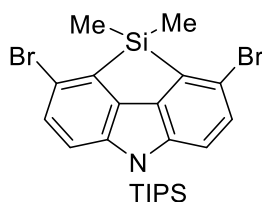

*N*-Bromosuccinimide (104.7 mg, 0.59 mmol) was added to a solution of **8a** (100.8 mg, 0.27 mmol) in acetic acid (2.7 mL) and the resultant mixture allowed to stir for 22 h. Water (15 mL) was added to the mixture and extracted with CH<sub>2</sub>Cl<sub>2</sub> (3 × 10 mL). The combined organic extracts were washed with brine (20 mL), dried over sodium sulfate, filtered, and concentrated under reduced pressure to give a colourless solid. The solid was purified by automated flash column chromatography (hexane) to give **14a** (129.9 mg, 91%) as a colourless solid. *R*<sub>f</sub> = 0.57 (hexane); mp 174 – 176 °C (hexane);  $\nu_{\text{max}}$  (solid, cm<sup>-1</sup>) 2948 br, 2866 br, 1600 w, 1488 w,

1459 w, 1440 m, 1425 m, 1391 m, 1366 w, 1288 w, 1247 m, 1214 m, 1190 s, 1152 m, 1071 w, 1032 m, 1014 m, 992 m, 924 w, 881 s, 842 s, 801 m, 784 s, 752 s, 704 m, 677 m, 654 s;  $^1\text{H}$  NMR ( $\text{CDCl}_3$ , 400 MHz)  $\delta_{\text{H}}$  7.34 (d,  $J$  8.5 Hz, 2 H), 7.29 (d,  $J$  8.4 Hz, 2 H), 1.86 (hept,  $J$  7.5 Hz, 3 H), 1.17 (d,  $J$  7.5 Hz, 18 H), 0.72 (s, 6H);  $^{13}\text{C}$  NMR (101 MHz)  $\delta_{\text{C}}$  142.2, 139.8, 134.6, 130.3, 118.0, 117.3, 18.4, 13.3,  $-4.3$ ;  $m/z$  (TOF ASAP+) calculated for  $\text{C}_{23}\text{H}_{32}\text{NSi}_2\text{Br}_2$   $[\text{M}+\text{H}]^+$ ; 536.0440, found 536.0446 (PPM error 1.1).

**1,7-Dichloro-8,8-dimethyl-4-(triisopropylsilyl)-4,8-dihydrosilolo[2,3,4,5-def]carbazole [15a]**

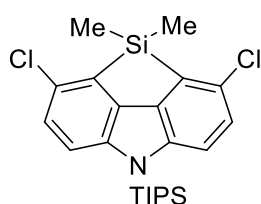

*N*-Chlorosuccinimide (82.0 mg, 0.61 mmol) was added to a solution of **8a** (99.4 mg, 0.26 mmol) in acetic acid (2.6 mL) and the resultant mixture heated at 50 °C for 24 h. Water (15 mL) was added to the mixture and extracted with  $\text{CH}_2\text{Cl}_2$  ( $3 \times 10$  mL). The combined organic extracts were washed with brine (10 mL), dried over sodium sulfate, filtered, and concentrated under reduced pressure. The crude material was purified by automated flash column chromatography (hexane) to give **15a** (103.5 mg, 88%) as a colourless solid.  $R_f$  = 0.45 (hexane); mp 149 – 151 °C (hexane);  $\nu_{\text{max}}$  (solid,  $\text{cm}^{-1}$ ) 2951 br, 2868 br, 1605 w, 1494 w, 1391 m, 1447 m, 1430 m, 1391 w, 1369 w, 1244 m, 1214 m, 1191 s, 1151 w, 1071 w, 1050 s, 1012 m, 878 s, 837 s, 787 s, 758 s, 708 s;  $^1\text{H}$  NMR ( $\text{CDCl}_3$ , 400 MHz)  $\delta_{\text{H}}$  7.43 (d,  $J$  8.4 Hz, 2 H), 7.20 (d,  $J$  8.4 Hz, 2 H), 1.86 (hept,  $J$  7.5 Hz, 3 H), 1.17 (d,  $J$  7.5 Hz, 18 H), 0.74 (s, 6H);  $^{13}\text{C}$  NMR (101 MHz)  $\delta_{\text{C}}$  141.9, 139.6, 131.0, 129.7, 127.7, 117.6, 18.4, 13.4,  $-2.9$ ;  $m/z$  (TOF ASAP+) calculated for  $\text{C}_{23}\text{H}_{32}\text{NSi}_2\text{Cl}_2$   $[\text{M}+\text{H}]^+$ ; 448.1457, found 448.1450 (PPM error 1.6).

**1,1'-(8,8-Dimethyl-4-(triisopropylsilyl)-4,8-dihydrosilolo[2,3,4,5-def]carbazole-1,7-diyl)bis(ethan-1-one) [16a]**

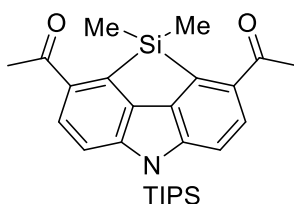

8,8-Dimethyl-4-(triisopropylsilyl)-4,8-dihydrosilolo[2,3,4,5-def]carbazole **8a** (101.0 mg, 0.27 mmol) was added to a suspension of aluminium chloride (108.8 mg, 0.82 mmol) in acetyl chloride (0.04 mL, 0.56 mmol) and CH<sub>2</sub>Cl<sub>2</sub> (1.3 mL), and the resultant mixture allowed to stir for 30 min. The reaction mixture was treated with HCl<sub>(aq)</sub> (1 M, 10 mL) and extracted with CH<sub>2</sub>Cl<sub>2</sub> (3 × 10 mL). The combined organic extracts were washed with brine (10 mL), dried over sodium sulfate, filtered, and concentrated under reduced pressure to give a beige solid. The beige solid was purified by automated flash column chromatography (hexane:EtOAc, 9:1) to give **16a** (61.2 mg, 50%) as a colourless solid. *R*<sub>f</sub> = 0.26 (hexane:EtOAc, 9:1); mp 205 – 207 °C (hexane); *v*<sub>max</sub> (solid, cm<sup>-1</sup>) 2948 br, 2867 br, 1665 m, 1603 m, 1530 w, 1489 m, 1461 m, 1423 m, 1384 m, 1353 m, 1253 m, 1199 s, 1152 m, 1071 w, 1015 m, 961 w, 880 s, 842 s, 802 s, 787 s, 748 s, 704 s, 674 s, 652 s; <sup>1</sup>H NMR (CDCl<sub>3</sub>, 400 MHz) *δ*<sub>H</sub> 7.98 (d, *J* 8.4 Hz, 2 H), 7.50 (d, *J* 8.4 Hz, 2 H), 2.69 (s, 6 H), 1.95 (hept, *J* 7.6 Hz, 3 H), 1.22 (d, *J* 7.5 Hz, 18 H), 0.77 (s, 6 H); <sup>13</sup>C NMR (101 MHz) *δ*<sub>C</sub> 198.0, 144.0, 142.0, 136.1, 135.2, 129.6, 115.0, 27.0, 18.4, 13.4, -4.2; *m/z* (TOF ASAP+) calculated for C<sub>27</sub>H<sub>38</sub>NO<sub>2</sub>Si<sub>2</sub> [M+H]<sup>+</sup>; 464.2441, found 464.2450 (PPM error 1.9).

#### 9-(Triisopropylsilyl)-9H-carbazol-4-ol [**17a**]

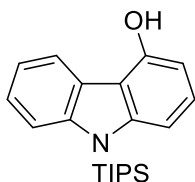

Potassium fluoride dihydrate (173.6 mg, 1.84 mmol) and potassium hydrogen carbonate (183.3 mg, 1.83 mmol) were added to a solution of **8a** (169.4 mg, 0.45 mmol) in THF:MeOH (1:1, 2 mL) at 0 °C. To this mixture was added hydrogen peroxide solution (30%, 1.37 mL, 13.4 mmol), after 10 min the cooling bath was removed, and the mixture allowed to stir for 21 h. Sat. Na<sub>2</sub>S<sub>2</sub>O<sub>3(aq)</sub> (25 mL) was added dropwise and the resultant mixture extracted with EtOAc (3 × 25 mL). The combined organic extracts were washed sequentially with H<sub>2</sub>O (25 mL) and brine (25 mL), dried over sodium sulfate, filtered, and concentrated under reduced pressure to give an orange oil. The orange oil was purified by automated flash column chromatography (hexane to hexane:EtOAc, 9:1) to give **17a** (87.6 mg, 58%) as a colourless oil. *R*<sub>f</sub> = 0.29 (hexane:EtOAc, 9:1); *v*<sub>max</sub> (oil, cm<sup>-1</sup>) 3516 br, 2948 br, 2867 br, 1630 w, 1580 w, 1437 s, 1242 m, 1047 s, 880 m, 785 m, 754 s, 717 s, 645 m; <sup>1</sup>H NMR (CDCl<sub>3</sub>, 400 MHz) *δ*<sub>H</sub> 8.36 (ddd, *J* 7.7 Hz, 1.5 Hz, 0.9 Hz, 1 H), 7.68 (d, *J* 8.4 Hz, 1 H), 7.34 (ddd, *J* 8.4 Hz, 7.2 Hz, 1.5 Hz, 1 H), 7.29 (d, *J* 8.4 Hz, 1 H), 7.24 (ddd, *J* 7.9 Hz, 7.0 Hz, 0.9 Hz, 1 H), 7.18 (dd, *J* 8.4 Hz, 7.8 Hz, 1 H), 6.58 (d, *J* 7.5 Hz, 1 H), 5.24 (s, 1 H), 1.99 (hept, *J* 7.6 Hz, 3 H), 1.20 (d, *J*

7.6 Hz, 18 H);  $^{13}\text{C}$  NMR (101 MHz)  $\delta_{\text{C}}$  151.8, 147.2, 144.6, 133.7, 125.7, 124.6, 122.8, 119.8, 114.9, 113.6, 107.2, 105.4, 18.7, 14.0;  $m/z$  (TOF ASAP+) calculated for  $\text{C}_{21}\text{H}_{30}\text{NOSi}$   $[\text{M}+\text{H}]^+$ ; 340.2097, found 340.2101 (PPM error 1.2).

### 9H-Carbazol-4-ol [17b]<sup>7</sup>

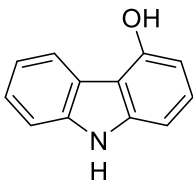

Tetrabutylammonium fluoride solution (1 M in THF, 0.27 mL, 0.27 mmol) was added to a solution of **17a** (61.4 mg, 0.18 mmol) in THF (0.9 mL). The mixture was allowed to stir for 2.5 h then treated with saturated  $\text{NH}_4\text{Cl}_{(\text{aq})}$  (10 mL) and extracted with EtOAc (3  $\times$  10 mL). The combined organic extracts were washed sequentially with  $\text{H}_2\text{O}$  (10 mL) and brine (10 mL), dried over sodium sulfate, filtered, and concentrated under reduced pressure to give a yellow oil. The yellow oil was purified by automated flash column chromatography ( $\text{CH}_2\text{Cl}_2$  to  $\text{CH}_2\text{Cl}_2$ :MeOH, 9:1) to give **17b** (30.4 mg, 92%) as a colourless solid.  $R_f$  = 0.52 ( $\text{CH}_2\text{Cl}_2$ ); mp 171 – 172  $^\circ\text{C}$  ( $\text{CH}_2\text{Cl}_2$ );  $\nu_{\text{max}}$  (solid,  $\text{cm}^{-1}$ ) 3395 br, 3211 br, 1637 w, 1608 m, 1586 m, 1505 m, 1446 s, 1330 m, 1306 m, 1268 m, 1205 m, 1043 s, 999 m, 930 m, 783 m, 751 s, 718 s;  $^1\text{H}$  NMR ( $\text{CDCl}_3$ , 400 MHz)  $\delta_{\text{H}}$  8.28 (dd,  $J$  7.8 Hz, 0.7 Hz, 1 H), 8.06 (br s, 1 H), 7.42 – 7.40 (stack, 2 H), 7.28 – 7.22 (stack, 2 H), 7.02 (dd,  $J$  8.1 Hz, 0.6 Hz, 1 H), 6.59 (dd,  $J$  7.8 Hz, 0.5 Hz, 1 H), 5.39 (s, 1 H);  $^{13}\text{C}$  NMR (101 MHz)  $\delta_{\text{C}}$  152.0, 141.5, 139.0, 126.7, 125.3, 122.9, 122.5, 119.9, 111.9, 110.2, 106.3, 103.5;  $m/z$  (TOF ASAP+) calculated for  $\text{C}_{12}\text{H}_{10}\text{NO}$   $[\text{M}+\text{H}]^+$ ; 184.0762, found 184.0757 (PPM error –2.7).

### 9-(triisopropylsilyl)-9H-carbazole-4,5-diol [18a]

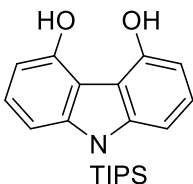

*N*-Methylmorpholine *N*-oxide (207 mg, 1.768 mmol) was added to a suspension of **7a** (139.1 mg, 0.353 mmol) in anhydrous acetonitrile (2.7 mL) and the mixture heated to reflux for 3 h. The reaction was monitored by TLC, using curcumin dip<sup>6</sup> with heating to visualize disappearance of the boronic anhydride **7a**. The mixture was then concentrated under reduced

pressure and the resulting residue purified by automated flash column chromatography (hexane to hexane:EtOAc, 9:1) to give **18a** (15.8 mg, 13%) as a colourless oil followed by **17a** 39.1 mg (31%) as a beige solid.

**Analytical data for [18a]**  $R_f$  = 0.30 (hexane:EtOAc, 85:15); mp 156 – 158 °C (hexane);  $\nu_{\max}$  (solid,  $\text{cm}^{-1}$ ) 3212 br, 2950 m, 2869 m, 1610 m, 1585 m, 1446 s, 1393 w, 1271 w, 1237 m, 1092 m, 1062 m, 1036 w, 900 w, 770 m, 718 s;  $^1\text{H}$  NMR ( $\text{CDCl}_3$ , 400 MHz)  $\delta_{\text{H}}$  8.26 (s, 2 H), 7.28 (dd,  $J$  8.4 Hz, 0.5 Hz, 2 H), 7.21 (dd,  $J$  8.4 Hz, 7.7 Hz, 2 H), 6.70 (dd,  $J$  7.6 Hz, 0.5 Hz, 2 H), 1.98 (hept,  $J$  7.5 Hz, 3 H), 1.19 (d,  $J$  7.5 Hz, 18 H);  $^{13}\text{C}$  NMR (101 MHz)  $\delta_{\text{C}}$  149.2, 146.8, 126.1, 113.5, 107.0, 105.9, 18.8, 14.0;  $m/z$  (TOF ES $^-$ ) calculated for  $\text{C}_{21}\text{H}_{28}\text{NO}_2\text{Si}$   $[\text{M}-\text{H}]^-$ ; 354.1889, found 354.1891 (PPM error 0.6).

**9-Amino-4-(triisopropylsilyl)azepino[3,4,5,6-def]carbazole-8,10(4H,9H)-dione [19a]**

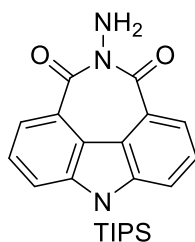

Hydrazine monohydrate (0.02 mL, 0.411 mmol) was added to a solution of **4a** (115.2 mg, 0.292 mmol) in methanol (9 mL) and the mixture heated at reflux for 24 h. The mixture was allowed to cool and the resulting precipitate was filtered, washed with methanol and dried under reduced pressure to give **19a** (35.7 mg, 30%) as a white powder which required no further purification.  $R_f$  = 0.31 ( $\text{CH}_2\text{Cl}_2/\text{EtOAc}$ , 2:8); mp 169 – 170 °C (MeOH);  $\nu_{\max}$  (solid,  $\text{cm}^{-1}$ ) 3624 w br, 3356 w, 3269 w, 2949 m, 2866 m, 1695 m, 1574 m, 1464 w, 1421 w, 1381 w, 1263 s, 1031 s, 990 m, 878 m, 842 m, 807 s, 756 s;  $^1\text{H}$  NMR ( $\text{DMSO}-d_6$ , 500 MHz)  $\delta_{\text{H}}$  7.80 (d,  $J$  8.0 Hz, 2 H), 7.48 (d,  $J$  6.8 Hz, 2 H), 7.37 (app t,  $J$  7.3 Hz, 2 H), 9 – 6.5 (br, 2 H), 2.05 (hept,  $J$  6.9 Hz, 3 H), 1.16 (d,  $J$  6.7 Hz, 18 H);  $^{13}\text{C}$  NMR (126 MHz)  $\delta_{\text{C}}$  172.4, 145.4, 134.13, 124.4, 122.7, 120.1, 115.0, 18.4, 13.2;  $m/z$  (TOF ASAP+) calculated for  $\text{C}_{23}\text{H}_{30}\text{N}_3\text{O}_2\text{Si}$   $[\text{M}+\text{H}]^+$ ; 408.2107, found 408.2097 (PPM error –2.4 ).

#### 4-(Triisopropylsilyl)-8,10-dihydro-4H-oxepino[3,4,5,6-def]carbazole [20a]

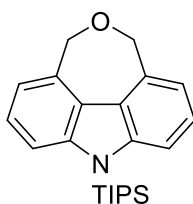

Diol **3a** (131.0 g, 0.34 mol) was suspended in 50%  $\text{H}_3\text{PO}_{4(\text{aq})}$  (2 mL) and heated at 90 °C for 11 h. The mixture was cooled to rt, diluted with  $\text{H}_2\text{O}$  (20 mL) and extracted by EtOAc (3 × 20 mL). The combined organic extracts were washed with sat.  $\text{NaHCO}_{3(\text{aq})}$  (20 mL), and dried over sodium sulfate, filtered and the solvent removed under reduced pressure to afford an off-white solid, which was purified by automated flash column chromatography (hexane:EtOAc, 95:5) to give **20a** (69.2 mg, 56%) as an off-white crystalline solid.  $R_f = 0.31$  (hexane:EtOAc, 95:5); mp 133 – 134 °C (hexane),  $\nu_{\text{max}}$  (solid,  $\text{cm}^{-1}$ ) 2946 m, 2866 m, 1610 w, 1583 w, 1464 m, 1433 s, 1375 m, 1308 m, 1287 m, 1262 s, 1244 s, 1112 m, 1069 m, 1016 m, 879 s, 768 s, 729 s, 676 s, 668 s;  $^1\text{H}$  NMR ( $\text{CDCl}_3$ , 400 MHz)  $\delta_{\text{H}}$  7.59 (dd,  $J$  8.5 Hz, 2 H), 7.27 (dd,  $J$  8.4 Hz, 7.3 Hz, 2H), 6.94 (dd,  $J$  7.2 Hz, 0.5 Hz, 2 H), 5.31 (s, 4H), 2.01 (hept,  $J$  7.5 Hz, 3 H), 1.20 (d,  $J$  7.5 Hz, 18 H);  $^{13}\text{C}$  NMR (101 MHz)  $\delta_{\text{C}}$  145.2, 136.2, 125.1, 124.2, 116.1, 112.9, 77.6, 18.7, 14.0;  $m/z$  (TOF MS) calculated for  $\text{C}_{23}\text{H}_{32}\text{NOSi}$   $[\text{M}+\text{H}]^+$ ; 366.2253, found 366.2264 (PPM error 3.0).

#### Iron hexacarbonyl complex [21a]

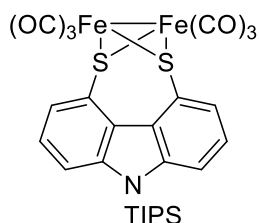

Triiron dodecacarbonyl (132.0 mg, 0.26 mmol) was added to a solution of **10a** (100.0 mg, 0.26 mmol) in toluene (10 mL), and the mixture heated to reflux for 1 h. The reaction mixture was then concentrated under reduced pressure to give a red solid. The red solid was purified by flash column chromatography (hexane) to give **21a** (113 mg, 66%) as a red solid.  $R_f = 0.25$  (hexane); mp 164 °C dec. (hexane);  $\nu_{\text{max}}$  (solid,  $\text{cm}^{-1}$ ) 2952 w, 2871 w, 2071 s, 2028 s, 2008 s, 1978 s, 1972 s, 1597 m, 1571 m, 1461 m, 1412 m, 1348 m, 1270 m, 1246 m, 994 m, 880 m, 773 s;  $^1\text{H}$  NMR ( $\text{CDCl}_3$ , 400 MHz)  $\delta_{\text{H}}$  8.03 (d,  $J$  7.6 Hz, 2 H), 7.85 (d,  $J$  8.2 Hz, 2 H), 7.31 (dd,  $J$  8.2 Hz, 7.8 Hz, 2 H), 2.00 (hept,  $J$  7.5 Hz, 3 H), 1.14 (d,  $J$  7.5 Hz, 18 H);  $^{13}\text{C}$  NMR (101

MHz)  $\delta_c$  207.5, 146.9, 136.4, 130.3, 124.4, 123.4, 115.1, 18.6, 14.1; m/z (TOF ASAP+) calculated for  $C_{27}H_{28}NO_6SiS_2^{54}Fe^{56}Fe$  [M+H]<sup>+</sup>; 663.9873, found 663.9868 (PPM error –0.8).

## Electrophile and substrate screen

### Electrophile screen

In an initial screen, the following electrophiles reacted poorly (<10% 4,5-disubstitution):

DMF;<sup>8</sup> 9% lactone (from trapping and concomitant Cannizzaro reaction<sup>9</sup>), 22% mono aldehyde

Cl(CO)CO<sub>2</sub>Et;<sup>10</sup> 4% diketone

Br<sub>2</sub>CHCHBr<sub>2</sub>;<sup>11</sup> 2% dibromide with concomitant desilylation

I<sub>2</sub>;<sup>12</sup> 2% diiodide with concomitant desilylation

Tellurium;<sup>13</sup> provides trace ditelluride.

Carbon disulfide;<sup>14</sup> provides <5% mixture of **10a:11a**.

Formaldehyde (0.5 M) in THF;<sup>15</sup> 5% **3a**, 10% **29a** and 29% **1a**.

In an initial screen, the following electrophiles underwent no appreciable reaction and starting material was evident in the <sup>1</sup>H NMR of the crude reaction mixture:

SiCl<sub>4</sub>,<sup>16</sup> MeSiHCl<sub>2</sub>,<sup>17</sup> (C<sub>3</sub>H<sub>6</sub>)SiCl<sub>2</sub>,<sup>18</sup> PhPCl<sub>2</sub>,<sup>19</sup> MgCl<sub>2</sub>•LiCl with PhP(O)Cl<sub>2</sub>,<sup>20</sup> Me<sub>2</sub>SnCl<sub>2</sub>,<sup>21</sup> *N*-fluorobenzenesulfonimide (NSFI),<sup>22-23</sup> allyl bromide, ZnCl<sub>2</sub> and Br<sub>2</sub>,<sup>23</sup> ZnCl<sub>2</sub> and CuCN•2LiCl with allyl bromide,<sup>23</sup> CuCN•2LiCl with allyl bromide, *p*-toluenesulfonyl azide,<sup>24</sup> benzyl bromide, PhS(O)<sub>2</sub>SPh,<sup>25</sup> benzophenone,<sup>26</sup> oxalyl chloride,<sup>10</sup> diethyl oxalate,<sup>10</sup> *N,N*-dimethylcarbonyl chloride.<sup>27</sup>

## Substrate screen

The *n*BuLi-TMEDA-directed metalation conditions were also investigated on methoxy-substituted *N*-TIPS carbazoles (Scheme S1). 3-Methoxycarbazole **23a** and 3,6-dimethoxycarbazole **24a** were converted into the corresponding silafluorenes **25a** and **26a** respectively, albeit in lower yield than for unsubstituted silafluorene **8a**. The 2-methoxycarbazole **27a** did not give any silafluorene. Subsequent investigation into the feasibility of the 4,5-dilithiation of **27a** using D<sub>2</sub>O as a trap gave two compounds, with no evidence of deuterium incorporation. The aromatic silane **28** presumably arises from a retro [1,3]-aza-Brook rearrangement of a 1-lithiocarbazole, where the inherent preference of carbazoles for C1-lithiation coupled with the directing effect of the 2-OMe group is presumably sufficient to overcome the bulk of the TIPS group.<sup>28</sup> Demethylation of **27a** to phenol **29** was also a significant pathway.

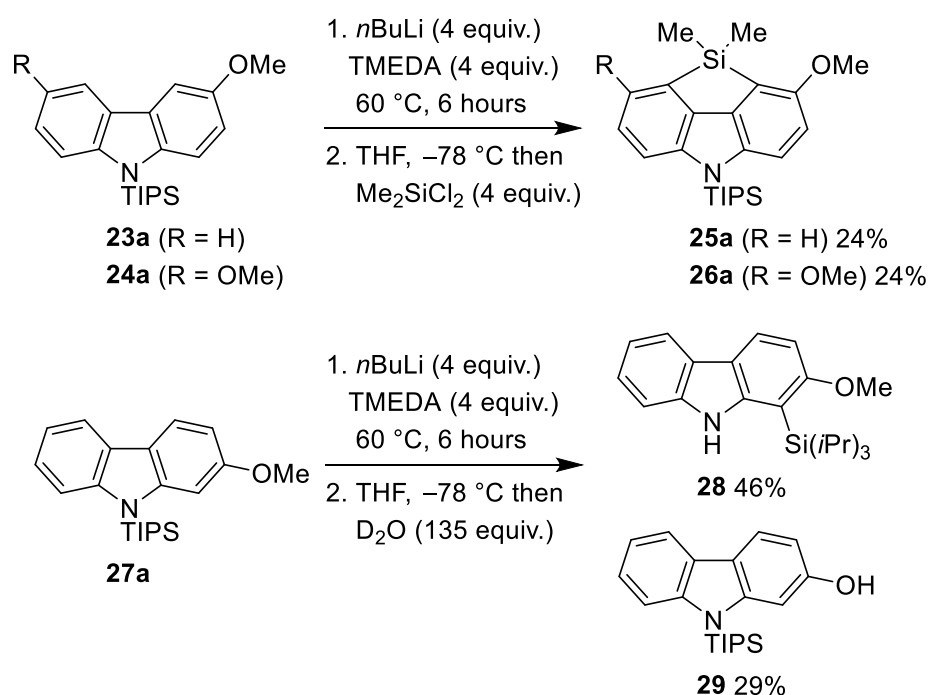

**Scheme S1** Reactions of methoxy-substituted *N*-TIPS carbazoles.

Experimental procedures and analytical data for **23-29** are reported below.

### 3-Methoxy-9-(triisopropylsilyl)-9H-carbazole [23a]

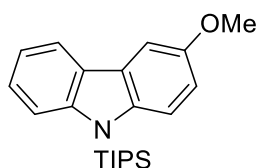

Following General Procedure 1: [From 17.3 mmol 3-methoxycarbazole with chlorotriisopropylsilane.] Purified by automated flash column chromatography (hexane:CH<sub>2</sub>Cl<sub>2</sub>, 9:1), **23a** (4.03 g, 66%) was obtained as a colourless oil that solidified on standing. *R*<sub>f</sub> = 0.09 (hexane:CH<sub>2</sub>Cl<sub>2</sub>, 9:1); mp 73 – 75 °C (hex); *v*<sub>max</sub> (solid, cm<sup>-1</sup>) 2947 br, 2866 br, 1627 w, 1595 w, 1481 s, 1449 s, 1439 s, 1391 w, 1301 w, 1263 m, 1239 s, 1198 s, 1176 s, 1119 w, 1070 w, 1039 s, 957 s, 921 w, 880 s, 851 s, 800 s, 747 s, 724 m, 686 s; <sup>1</sup>H NMR (CDCl<sub>3</sub>, 400 MHz)  $\delta$ <sub>H</sub> 8.02 (dd, *J* 7.8 Hz, 0.9 Hz, 1 H), 7.67 (d, *J* 8.5 Hz, 1 H), 7.59 (d, *J* 9.0 Hz, 1 H), 7.53 (d, *J* 2.7 Hz, 1 H), 7.34 (ddd, *J* 8.5 Hz, 7.1 Hz, 1.4 Hz, 1 H), 7.20 (ddd, *J* 7.8 Hz, 6.9 Hz, 0.7 Hz, 1 H), 6.99 (dd, *J* 9.1 Hz, 2.7 Hz, 1 H), 3.93 (s, 3 H), 1.97 (hept, *J* 7.5 Hz, 3 H), 1.19 (d, *J* 7.5 Hz, 18 H); <sup>13</sup>C NMR (101 MHz)  $\delta$ <sub>C</sub> 153.8, 145.9, 139.8, 127.2, 126.6, 125.4, 119.8, 119.2, 114.9, 114.3, 114.2, 102.4, 56.0, 18.7, 14.0; *m/z* (TOF ASAP+) calculated for C<sub>22</sub>H<sub>32</sub>NOSi [M+H]<sup>+</sup>; 354.2253, found 354.2260 (PPM error 2.0).

### 3,6-Dimethoxy-9-(triisopropylsilyl)-9H-carbazole [24a]

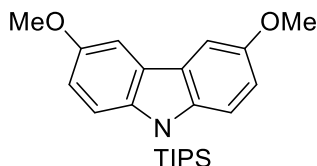

Following General Procedure 1: [From 9.01 mmol 3,6-dimethoxycarbazole with chlorotriisopropylsilane.] Purified by automated flash column chromatography (hexane:CH<sub>2</sub>Cl<sub>2</sub>, 9:1), **24a** (3.03 g, 88%) was obtained as a colourless solid. *R*<sub>f</sub> = 0.44 (Hex:EtOAc, 9:1); mp 97 – 99 °C (hex); *v*<sub>max</sub> (solid, cm<sup>-1</sup>) 2947 br, 2867 br, 1607 w, 1576 w, 1485 s, 1458 s, 1431 s, 1392 w, 1341 w, 1296 m, 1254 m, 1228 s, 1194 s, 1162 s, 1034 s, 1019 s, 960 s, 908 s, 885 s, 842 s, 800 s, 785 s; <sup>1</sup>H NMR (CDCl<sub>3</sub>, 400 MHz)  $\delta$ <sub>H</sub> 7.56 (d, *J* 9.1 Hz, 2 H), 7.47 (d, *J* 2.7 Hz, 2 H), 6.96 (dd, *J* 9.1 Hz, 2.7 Hz, 2 H), 3.93 (s, 6 H), 1.94 (hept, *J* 7.5 Hz, 3 H), 1.18 (d, *J* 7.6 Hz, 18 H); <sup>13</sup>C NMR (101 MHz)  $\delta$ <sub>C</sub> 153.6, 140.6, 127.1, 115.1, 114.5, 102.2, 56.0, 18.7, 14.0; *m/z* (TOF ASAP+) calculated for C<sub>23</sub>H<sub>34</sub>NO<sub>2</sub>Si [M+H]<sup>+</sup>; 384.2359, found 384.2362 (PPM error 0.8).

**1-Methoxy-8,8-dimethyl-4-(triisopropylsilyl)-4,8-dihydrosilolo[2,3,4,5-def]carbazole**  
**[25a]**

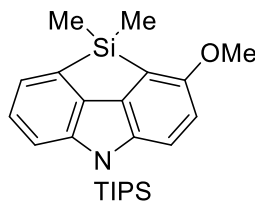

Following General Procedure 2: [From 0.70 mmol **23a**, using dichlorodimethylsilane as the electrophile (4 eq.).] The reaction mixture was poured into sat.  $\text{NaHCO}_3(\text{aq})$  (15 mL) and extracted with  $\text{CH}_2\text{Cl}_2$  (3  $\times$  15 mL). The combined organic extracts were washed with brine (15 mL), dried over sodium sulfate, filtered, and concentrated under reduced pressure. The crude material was purified by automated flash column chromatography (hexane: $\text{CH}_2\text{Cl}_2$ , 9:1) to give **25a** 68.2 mg (24%) as a yellow oil.  $R_f$  = 0.08 (hexane: $\text{CH}_2\text{Cl}_2$ , 9:1);  $\nu_{\text{max}}$  (oil,  $\text{cm}^{-1}$ ) 2947 br, 2867 br, 1606 w, 1502 w, 1470 s, 1447 s, 1423 m, 1382 m, 1331 w, 1230 s, 1171 m, 1072 m, 1042 m, 1014 m, 957 w, 881 m, 861 m, 838 s, 799 s, 756 s, 685 s;  $^1\text{H}$  NMR ( $\text{CDCl}_3$ , 400 MHz)  $\delta_{\text{H}}$  7.45 – 7.41 (m, 1 H), 7.38 (d,  $J$  8.5 Hz, 1 H), 7.31 (brs, 1 H), 7.30 (d,  $J$  1.6 Hz, 1 H), 6.85 (d,  $J$  8.6 Hz, 1 H), 3.93 (s, 6 H), 1.90 (hept,  $J$  7.6 Hz, 3 H), 1.18 (d,  $J$  7.6 Hz, 18 H), 0.69 (s, 6 H);  $^{13}\text{C}$  NMR (101 MHz)  $\delta_{\text{C}}$  158.2, 141.9, 141.3, 141.0, 135.3, 132.1, 127.2, 122.8, 117.7, 116.1, 115.5, 112.5, 56.5, 18.5, 13.5, 0.2;  $m/z$  (TOF ASAP+) calculated for  $\text{C}_{24}\text{H}_{36}\text{NOSi}_2$   $[\text{M}+\text{H}]^+$ ; 410.2335, found 410.2343 (PPM error 2.0).

**1,7-Dimethoxy-8,8-dimethyl-4-(triisopropylsilyl)-4,8-dihydrosilolo[2,3,4,5-def]carbazole**  
**[26a]**

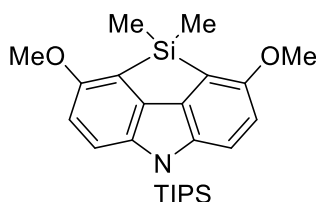

Following General Procedure 2: [From 0.31 mmol **24a** with 1.87 mmol TMEDA, using dichlorodimethylsilane as the electrophile (4 eq.).] The reaction mixture was poured into sat.  $\text{NaHCO}_3(\text{aq})$  (15 mL) and extracted with  $\text{CH}_2\text{Cl}_2$  (3  $\times$  15 mL). The combined organic extracts were washed with brine (15 mL), dried over sodium sulfate, filtered, and concentrated under reduced pressure. The crude material was purified by automated flash column chromatography (hexane: $\text{CH}_2\text{Cl}_2$ , 1:1) to give **26a** 32.1 mg (24%) as a colourless solid.  $R_f$  = 0.43 (hexane: $\text{CH}_2\text{Cl}_2$ , 1:1); mp 103 – 105  $^{\circ}\text{C}$  (hexane);  $\nu_{\text{max}}$  (solid,  $\text{cm}^{-1}$ ) 2948 br, 2865 br,

1592 w, 1542 w, 1474 m, 1451 s, 1426 m, 1371 w, 1331 w, 1300 w, 1224 s, 1207 s, 1178 m, 1140 w, 1059 m, 1013 m, 990 w, 948 w, 883 m, 836 m, 769 s, 705 m;  $^1\text{H}$  NMR ( $\text{CDCl}_3$ , 400 MHz)  $\delta_{\text{H}}$  7.36 (d,  $J$  8.6 Hz, 2 H), 6.85 (d,  $J$  8.6 Hz, 2 H), 3.93 (s, 6 H), 1.87 (hept,  $J$  7.5 Hz, 3 H), 1.18 (d,  $J$  7.5 Hz, 18 H), 0.77 (s, 6 H);  $^{13}\text{C}$  NMR (101 MHz)  $\delta_{\text{C}}$  157.6, 141.6, 136.0, 117.5, 115.5, 112.7, 56.7, 18.5, 13.5, 1.5;  $m/z$  (TOF ASAP+) calculated for  $\text{C}_{25}\text{H}_{38}\text{NO}_2\text{Si}_2$   $[\text{M}+\text{H}]^+$ ; 440.2441, found 440.2448 (PPM error 1.6).

## 2-Methoxy-9-(triisopropylsilyl)-9H-carbazole [27a]

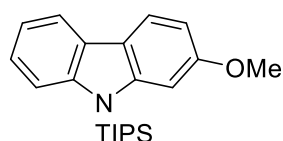

Following General Procedure 1: [From 2.53 mmol 2-methoxycarbazole with chlorotriisopropylsilane.] Purified by automated flash column chromatography (hexane: $\text{CH}_2\text{Cl}_2$ , 9:1), **27a** (843.5 mg, 94%) was obtained as a colourless oil that solidified on standing.  $R_f$  = 0.65 (hexane:EtOAc, 9:1); mp 75 – 77 °C (hex);  $\nu_{\text{max}}$  (solid,  $\text{cm}^{-1}$ ) 2951 br, 2865 br, 1627 w, 1597 w, 1573 w, 1494 w, 1457 s, 1422 w, 1350 w, 1329 w, 1268 m, 1187 s, 1150 s, 1128 s, 1044 m, 1011 m, 963 s, 914 m, 882 s, 839 m, 795 m, 759 s, 732 m, 648 s, 680 s;  $^1\text{H}$  NMR ( $\text{CDCl}_3$ , 400 MHz)  $\delta_{\text{H}}$  7.96 (dd,  $J$  7.6 Hz, 0.9 Hz, 1 H), 7.93 (d,  $J$  8.5 Hz, 1 H), 7.64 (d,  $J$  8.4 Hz, 1 H), 7.28 (ddd,  $J$  8.5 Hz, 7.1 Hz, 1.4 Hz, 1 H), 7.22 (d,  $J$  2.3 Hz, 1 H), 7.20 (ddd,  $J$  8.5 Hz, 7.1 Hz, 0.7 Hz, 1 H), 6.87 (dd,  $J$  8.5 Hz, 2.1 Hz, 1 H), 3.90 (s, 3 H), 1.99 (hept,  $J$  7.5 Hz, 3 H), 1.21 (d,  $J$  7.5 Hz, 18 H);  $^{13}\text{C}$  NMR (101 MHz)  $\delta_{\text{C}}$  158.5, 146.5, 145.2, 126.7, 124.2, 120.7, 120.1, 119.7, 119.0, 114.0, 107.4, 99.5, 55.8, 18.8, 13.9;  $m/z$  (TOF ES+) calculated for  $\text{C}_{22}\text{H}_{31}\text{NOSi}$   $[\text{M}+\text{H}]^+$ ; 354.253, found 354.2263 (PPM error 2.8).

## 2-Methoxy-1-(triisopropylsilyl)-9H-carbazole [28] and 9-(Triisopropylsilyl)-9H-carbazol-2-ol [29]

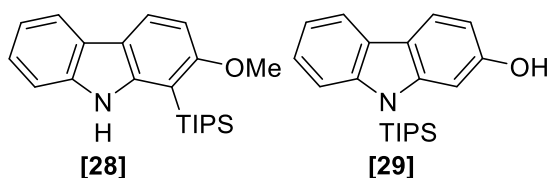

Following General Procedure 2: [From 0.42 mmol **27a** with 2.26 mmol TMEDA, using  $\text{D}_2\text{O}$  as the electrophile (89 eq.).] The reaction mixture was poured into sat.  $\text{NH}_4\text{Cl}_{(\text{aq})}$  (20 mL) and extracted with  $\text{CH}_2\text{Cl}_2$  (4  $\times$  15 mL). The combined organic extracts were washed with brine

(20 mL), dried over sodium sulfate, filtered, and concentrated under reduced pressure. The crude material was purified by automated flash column chromatography (hexane:CH<sub>2</sub>Cl<sub>2</sub>, 1:0 to 1:1) to give **28** (67.9 mg, 46%) as a colourless solid followed by **29** (41.3 mg, 29%) as a tan solid.

**Analytical data for [28]**  $R_f$  = 0.71 (hexane:CH<sub>2</sub>Cl<sub>2</sub>, 1:1); mp 87 – 89 °C (hexane);  $\nu_{\max}$  (solid, cm<sup>-1</sup>) 3488 m, 2945 br, 2867 br, 1601 m, 1563 m, 1459 m, 1395 s, 1313 m, 1267 m, 1214 s, 1171 s, 1143 m, 1070 m, 1014 m, 883 s, 802 m, 780 m, 771 m, 745 s, 733 s, 685 m; <sup>1</sup>H NMR (CDCl<sub>3</sub>, 400 MHz)  $\delta_H$  8.25 (br s, 1 H), 8.05 (d,  $J$  8.6 Hz, 1 H), 7.98 (d,  $J$  7.7 Hz, 1 H), 7.35 – 7.40 (m, 1 H), 7.32 – 7.36 (m, 1 H), 7.20 (ddd,  $J$  8.6 Hz, 7.7 Hz, 0.9 Hz, 1 H), 6.85 (d,  $J$  8.6 Hz, 1 H), 3.87 (s, 3 H), 1.60 (hept,  $J$  7.4 Hz, 3 H), 1.16 (d,  $J$  7.4 Hz, 18 H); <sup>13</sup>C NMR (101 MHz)  $\delta_C$  164.4, 146.4, 139.5, 124.6, 123.2, 122.3, 119.4, 119.3, 117.7, 110.2, 103.2, 103.1, 55.2, 19.3, 13.5;  $m/z$  (TOF ASAP+) calculated for C<sub>22</sub>H<sub>32</sub>NOSi [M+H]<sup>+</sup>; 354.2253, found 354.2259 (PPM error 1.7).

**Analytical data for [29]**  $R_f$  = 0.11 (hexane:CH<sub>2</sub>Cl<sub>2</sub>, 1:1); mp 148 – 150 °C (hexane);  $\nu_{\max}$  (solid, cm<sup>-1</sup>) 3273 br, 2949 br, 2867 m, 1631 m, 1599 m, 1579 m, 1470 m, 1456 s, 1435 s, 1365 m, 1274 s, 1145 s, 1125 s, 1071 m, 1017 m, 927 s, 882 s, 834 s, 803 m, 762 m, 747 s, 726 s, 680; <sup>1</sup>H NMR (CDCl<sub>3</sub>, 400 MHz)  $\delta_H$  7.94 (dd,  $J$  1.0 Hz, 7.6 Hz, 1 H), 7.88 (d,  $J$  8.4 Hz, 1 H), 7.63 (d,  $J$  8.5 Hz, 1 H), 7.28 (ddd,  $J$  8.4 Hz, 7.2 Hz, 1.4 Hz, 1 H), 7.19 (dd,  $J$  7.6 Hz, 7.4 Hz, 1 H), 7.16 (d,  $J$  1.7 Hz, 1 H), 6.74 (dd,  $J$  8.3 Hz, 2.1 Hz, 1 H), 4.75 (s, 1 H), 1.98 (hept,  $J$  7.5 Hz, 3 H), 1.20 (d,  $J$  7.5 Hz, 18 H); <sup>13</sup>C NMR (101 MHz)  $\delta_C$  154.6, 147.0, 145.7, 127.1, 124.7, 121.3, 120.7, 120.2, 119.4, 114.5, 109.0, 101.2, 19.2, 14.4;  $m/z$  (TOF ASAP+) calculated for C<sub>21</sub>H<sub>29</sub>NOSi [M]<sup>+</sup>; 339.2018, found 339.2027 (PPM error 2.7).

## X-ray crystallography

CCDC 2079909 – CCDC 2079912 (**1a**, **8a**, **10b** and **12b** respectively) and CCDC 2080733-2080736 (**3a**, **5a**, **6b** and **20a** respectively) contain the supplementary crystallographic data for this paper. These data can be obtained free of charge from The Cambridge Crystallographic Data Centre via [www.ccdc.cam.ac.uk/data\\_request/cif](http://www.ccdc.cam.ac.uk/data_request/cif).

The datasets for **1a**, **3a**, **5a**, **6b**, **8a**, **10b**, **12b** and **20a** were measured on an Agilent SuperNova diffractometer using an Atlas detector. The data collections were driven and processed and absorption corrections were applied using CrysAlisPro.<sup>29</sup> The structures were solved using ShelXT.<sup>30</sup> All structures were refined by a full-matrix least-squares procedure on  $F^2$  in ShelXL.<sup>31</sup> Figures and reports were produced using OLEX2.<sup>32</sup> All non-hydrogen atoms were refined with anisotropic displacement parameters. In **10b** the hydrogen atoms bonded to N(1) and N(101), and in **6b** and **12b** the hydrogen atom bonded to N(1), were located in the electron density and freely refined. All remaining hydrogen atoms in all structures were fixed as riding models and the isotropic thermal parameters ( $U_{iso}$ ) were based on the  $U_{eq}$  of the parent atoms.

Crystal data for **1a**: C<sub>21</sub>H<sub>29</sub>NSi (*M* = 323.54 g/mol): monoclinic, space group P2<sub>1</sub>/c (no. 14), *a* = 9.3498(4) Å, *b* = 7.3678(3) Å, *c* = 27.1186(10) Å,  $\beta$  = 98.469(4)°, *V* = 1847.76(12) Å<sup>3</sup>, *Z* = 4, *T* = 100.01(10) K,  $\mu(\text{CuK}\alpha)$  = 1.093 mm<sup>-1</sup>, *D*<sub>calc</sub> = 1.163 g/cm<sup>3</sup>, 6721 reflections measured (9.564° ≤ 2 $\theta$  ≤ 140.102°), 3490 unique (*R*<sub>int</sub> = 0.0354, *R*<sub>sigma</sub> = 0.0476) which were used in all calculations. The final *R*<sub>1</sub> was 0.0581 (*I* > 2 $\sigma$ (*I*)) and *wR*<sub>2</sub> was 0.1522 (all data).

Crystals were obtained by slow evaporation from Et<sub>2</sub>O.

The methyl group C(22) / C(22') is disordered over two positions at a refined percentage occupancy ratio of 84 (2) : 16 (2).

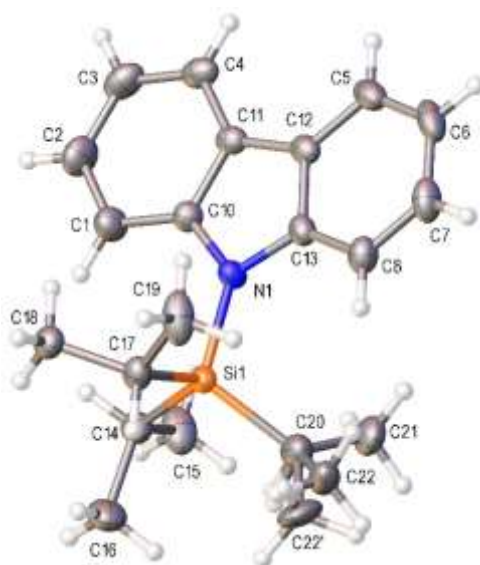

**Figure S1** Crystal structure of **1a** with ellipsoids drawn at the 50 % probability level. The methyl group C(22) / C(22') is disordered over two positions at a refined percentage occupancy ratio of 84 (2) : 16 (2).

Crystal data for **3a**:  $C_{23}H_{33}NO_2Si$  ( $M = 383.59$  g/mol): hexagonal, space group  $P6_1$  (no. 169),  $a = 19.2612(6)$  Å,  $c = 9.9892(5)$  Å,  $V = 3209.4(3)$  Å<sup>3</sup>,  $Z = 6$ ,  $T = 100.00(10)$  K,  $\mu(\text{Cu K}\alpha) = 1.092$  mm<sup>-1</sup>,  $D_{\text{calc}} = 1.191$  g/cm<sup>3</sup>, 18641 reflections measured ( $9.182^\circ \leq 2\theta \leq 140.086^\circ$ ), 3827 unique ( $R_{\text{int}} = 0.0319$ ,  $R_{\text{sigma}} = 0.0270$ ) which were used in all calculations. The final  $R_1$  was 0.0611 ( $I > 2\sigma(I)$ ) and  $wR_2$  was 0.1764 (all data).

Crystals were obtained by slow evaporation from ethanol

The  $\text{CH}_2\text{-OH}$  group  $\text{C}(13)\text{-O}(1)$  /  $\text{C}(13\text{A})\text{-O}(1\text{A})$  is disordered over two positions, at a refined percentage occupancy ratio of 59 (2) : 49 (2).

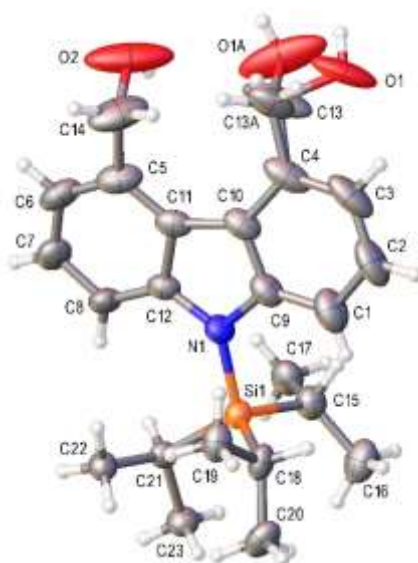

**Figure S2** Crystal structure of **3a** with ellipsoids drawn at the 50 % probability level. The  $\text{CH}_2\text{-OH}$  group  $\text{C}(13)\text{-O}(1)$  /  $\text{C}(13\text{A})\text{-O}(1\text{A})$  is disordered over two positions, at a refined percentage occupancy ratio of 59 (2) : 49 (2).

Crystal data for **5a**: C<sub>27</sub>H<sub>27</sub>F<sub>4</sub>NSi (*M* = 469.58 g/mol): monoclinic, space group P2<sub>1</sub>/n (no. 14), *a* = 8.2725(4) Å, *b* = 19.9141(9) Å, *c* = 13.8083(7) Å,  $\beta$  = 101.265(5)°, *V* = 2230.95(19) Å<sup>3</sup>, *Z* = 4, *T* = 100.01(10) K,  $\mu$ (Cu K $\alpha$ ) = 1.359 mm<sup>-1</sup>, *D*<sub>calc</sub> = 1.398 g/cm<sup>3</sup>, 8851 reflections measured (7.896° ≤ 2 $\theta$  ≤ 146.254°), 4330 unique (*R*<sub>int</sub> = 0.0280, *R*<sub>sigma</sub> = 0.0344) which were used in all calculations. The final *R*<sub>1</sub> was 0.0377 (*I* > 2 $\sigma$ (*I*)) and *wR*<sub>2</sub> was 0.1036 (all data).

Crystals were obtained by slow evaporation from chloroform.

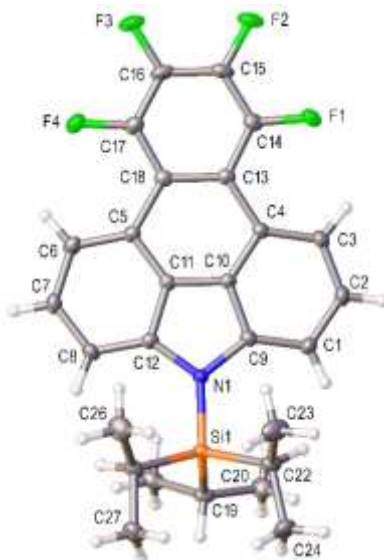

**Figure S3** Crystal structure of **5a** with ellipsoids drawn at the 50 % probability level.

Crystal data for **6b**: C<sub>12</sub>H<sub>7</sub>Cl<sub>2</sub>N (*M* = 236.09 g/mol): orthorhombic, space group P2<sub>1</sub>2<sub>1</sub>2<sub>1</sub> (no. 19), *a* = 3.8267(2) Å, *b* = 14.2898(6) Å, *c* = 17.5522(7) Å, *V* = 959.80(7) Å<sup>3</sup>, *Z* = 4, *T* = 100.00(10) K,  $\mu(\text{Cu K}\alpha)$  = 5.725 mm<sup>-1</sup>, *D*<sub>calc</sub> = 1.634 g/cm<sup>3</sup>, 9168 reflections measured (7.978° ≤ 2 $\theta$  ≤ 145.682°), 1895 unique (*R*<sub>int</sub> = 0.0352, *R*<sub>sigma</sub> = 0.0257) which were used in all calculations. The final *R*<sub>1</sub> was 0.0270 (*I* > 2 $\sigma$ (*I*)) and *wR*<sub>2</sub> was 0.0683 (all data).

Crystals were obtained by slow evaporation from CH<sub>2</sub>Cl<sub>2</sub>

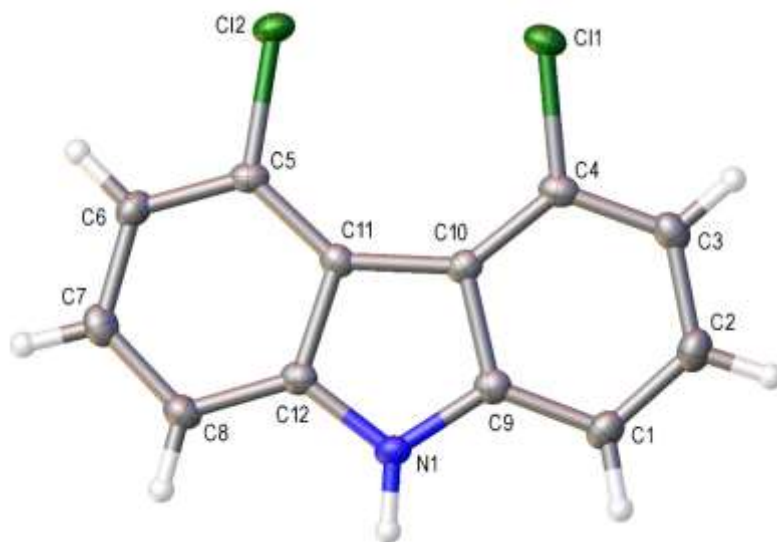

**Figure S4** Crystal structure of **6b** with ellipsoids drawn at the 50 % probability level.

Crystal data for **8a**: C<sub>23</sub>H<sub>33</sub>NSi<sub>2</sub> (*M* = 379.68 g/mol): monoclinic, space group P2<sub>1</sub>/c (no. 14), *a* = 13.1260(5) Å, *b* = 15.4832(4) Å, *c* = 12.3174(5) Å,  $\beta$  = 117.891(5)°, *V* = 2212.51(16) Å<sup>3</sup>, *Z* = 4, *T* = 100.01(10) K,  $\mu$ (CuK $\alpha$ ) = 1.483 mm<sup>-1</sup>, *D*<sub>calc</sub> = 1.140 g/cm<sup>3</sup>, 8569 reflections measured (9.526° ≤ 2 $\theta$  ≤ 138.262°), 4107 unique (*R*<sub>int</sub> = 0.0250, *R*<sub>sigma</sub> = 0.0323) which were used in all calculations. The final *R*<sub>1</sub> was 0.0361 (*I* > 2 $\sigma$ (*I*)) and *wR*<sub>2</sub> was 0.1018 (all data).

Crystals obtained by recrystallisation of pure material from hot ethanol.

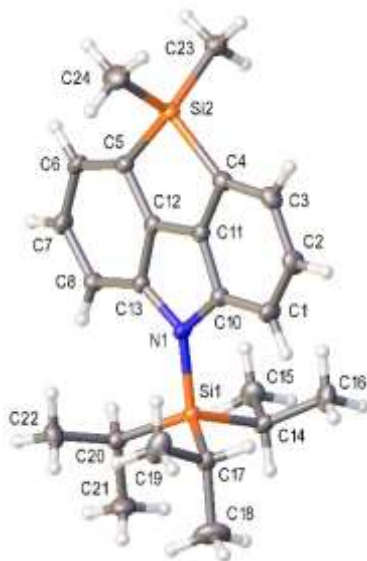

**Figure S5** Crystal structure of **8a** with ellipsoids drawn at the 50 % probability level.

Crystal data for **10b**: C<sub>12</sub>H<sub>7</sub>NS<sub>2</sub> (*M* = 229.31 g/mol): triclinic, space group P-1 (no. 2), *a* = 9.3372(6) Å, *b* = 10.5025(6) Å, *c* = 10.6156(6) Å,  $\alpha$  = 92.683(4)°,  $\beta$  = 108.926(5)°,  $\gamma$  = 91.966(5)°, *V* = 982.30(10) Å<sup>3</sup>, *Z* = 4, *T* = 100.00(10) K,  $\mu$ (CuK $\alpha$ ) = 4.559 mm<sup>-1</sup>, *D*<sub>calc</sub> = 1.551 g/cm<sup>3</sup>, 6804 reflections measured (8.44° ≤ 2 $\theta$  ≤ 149.248°), 3862 unique (*R*<sub>int</sub> = 0.0234, *R*<sub>sigma</sub> = 0.0301) which were used in all calculations. The final *R*<sub>1</sub> was 0.0292 (*I* > 2 $\sigma$ (*I*)) and *wR*<sub>2</sub> was 0.0776 (all data).

Crystals were obtained by slow evaporation from Et<sub>2</sub>O.

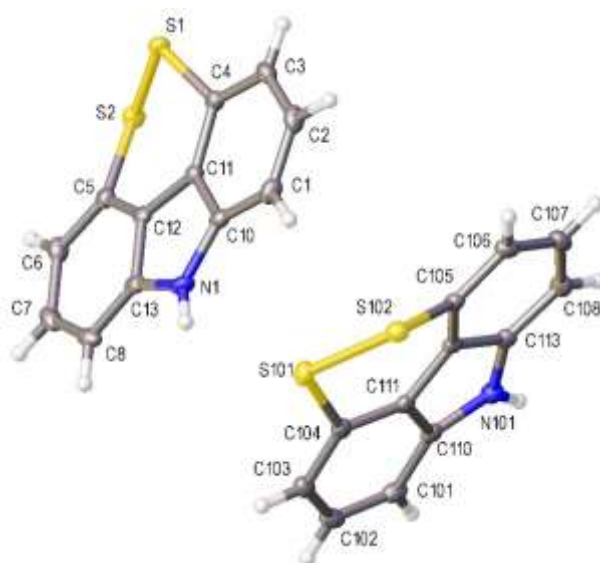

**Figure S6** Crystal structure of **10b** with ellipsoids drawn at the 50 % probability level. The structure contains two crystallographically-independent molecules.

Crystal data for **12b**: C<sub>12</sub>H<sub>7</sub>NSe<sub>2</sub> (*M* = 323.11 g/mol): monoclinic, space group P2<sub>1</sub>/n (no. 14), *a* = 9.9907(4) Å, *b* = 6.7480(3) Å, *c* = 14.9843(6) Å,  $\beta$  = 95.086(4)°, *V* = 1006.22(7) Å<sup>3</sup>, *Z* = 4, *T* = 100.00(10) K,  $\mu$ (CuK $\alpha$ ) = 8.847 mm<sup>-1</sup>, *D*<sub>calc</sub> = 2.133 g/cm<sup>3</sup>, 3677 reflections measured (10.238° ≤ 2 $\theta$  ≤ 148.818°), 1999 unique (*R*<sub>int</sub> = 0.0172, *R*<sub>sigma</sub> = 0.0207) which were used in all calculations. The final *R*<sub>1</sub> was 0.0215 (*I* > 2 $\sigma$ (*I*)) and *wR*<sub>2</sub> was 0.0561 (all data).

Crystals were obtained by slow evaporation for CH<sub>2</sub>Cl<sub>2</sub>

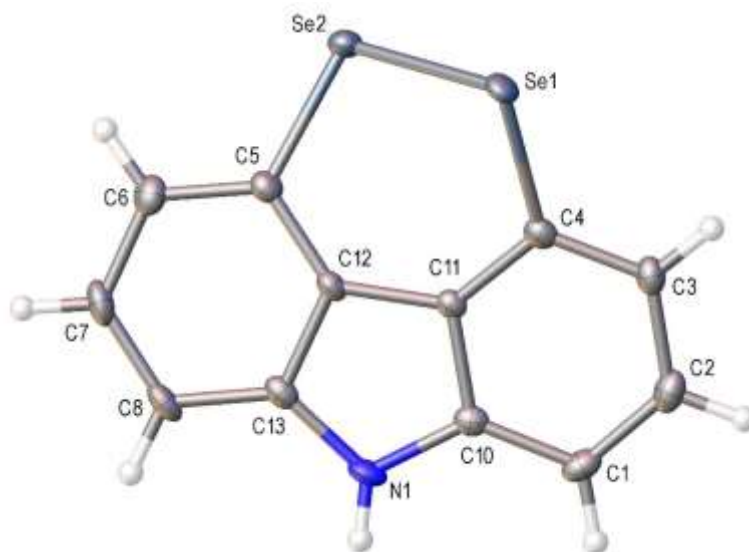

**Figure S7** Crystal structure of **12b** with ellipsoids drawn at the 50 % probability level.

Crystal data for **20a**: C<sub>23</sub>H<sub>31</sub>NOSi (*M* = 365.58 g/mol): orthorhombic, space group Pbca (no. 61), *a* = 9.0996(3) Å, *b* = 14.8381(5) Å, *c* = 29.5722(8) Å, *V* = 3992.9(2) Å<sup>3</sup>, *Z* = 8, *T* = 100.01(10) K,  $\mu(\text{Cu K}\alpha)$  = 1.109 mm<sup>-1</sup>, *D*<sub>calc</sub> = 1.216 g/cm<sup>3</sup>, 9832 reflections measured (11.418° ≤ 2 $\theta$  ≤ 146.074°), 3879 unique (*R*<sub>int</sub> = 0.0278, *R*<sub>sigma</sub> = 0.0285) which were used in all calculations. The final *R*<sub>1</sub> was 0.0409 (*I* > 2 $\sigma$ (*I*)) and *wR*<sub>2</sub> was 0.1159 (all data).

Crystals were obtained by slow evaporation from EtOAc.

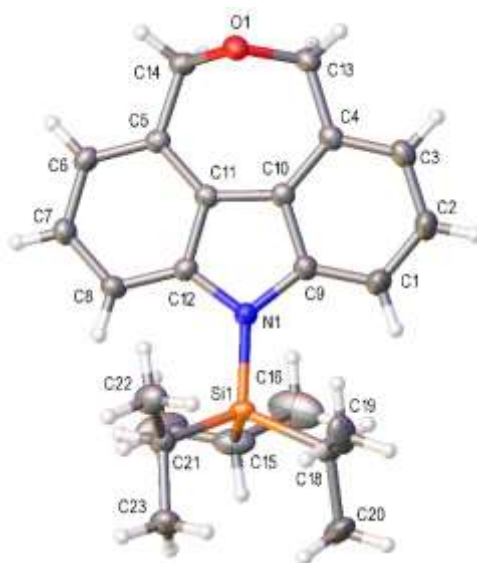

**Figure S8** Crystal structure of **20a** with ellipsoids drawn at the 50 % probability level.

## Copies of NMR spectra

### Deuteration study (Table 1, Entry 2)

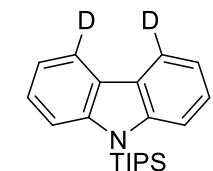

**1a-D**

(83% deuteration)

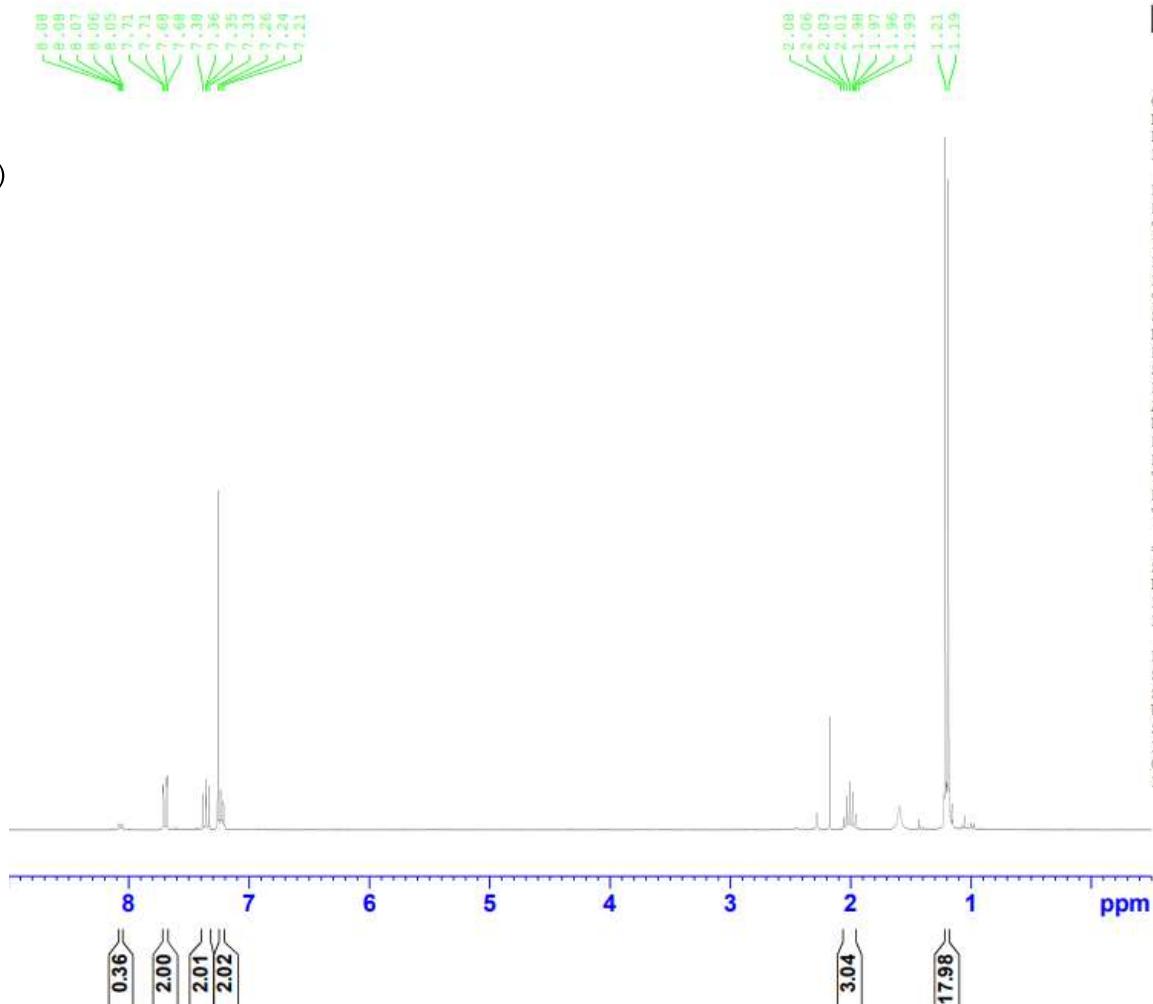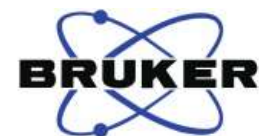

Current Data Parameters  
NAME  
EXPNO 10  
PROCNO 1

F2 - Acquisition Parameters  
Date\_ 20181119  
Time 21.05  
INSTRUM spect  
PROBHD 5 mm PABBO BB-  
PULPROG zg30  
TD 32768  
SOLVENT CDCl<sub>3</sub>  
NS 32  
DS 2  
SWH 6009.615 Hz  
FIDRES 0.183399 Hz  
AQ 2.7262976 sec  
RG 645  
DW 83.200 usec  
DE 13.27 usec  
TE 296.7 K  
D1 1.00000000 sec  
TD0 1

===== CHANNEL f1 =====  
SFO1 300.0718531 MHz  
NUC1 1H  
P1 10.95 usec  
PLW1 15.00000000 W

F2 - Processing parameters  
SI 32768  
SF 300.0700073 MHz  
WDW EM  
SSB 0  
LB 0.30 Hz  
GB 0  
PC 1.00

**<sup>2</sup>H NMR from (Table 1, Entry 2)**

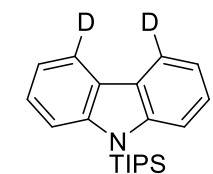

**1a-D**

(83% deuteration)

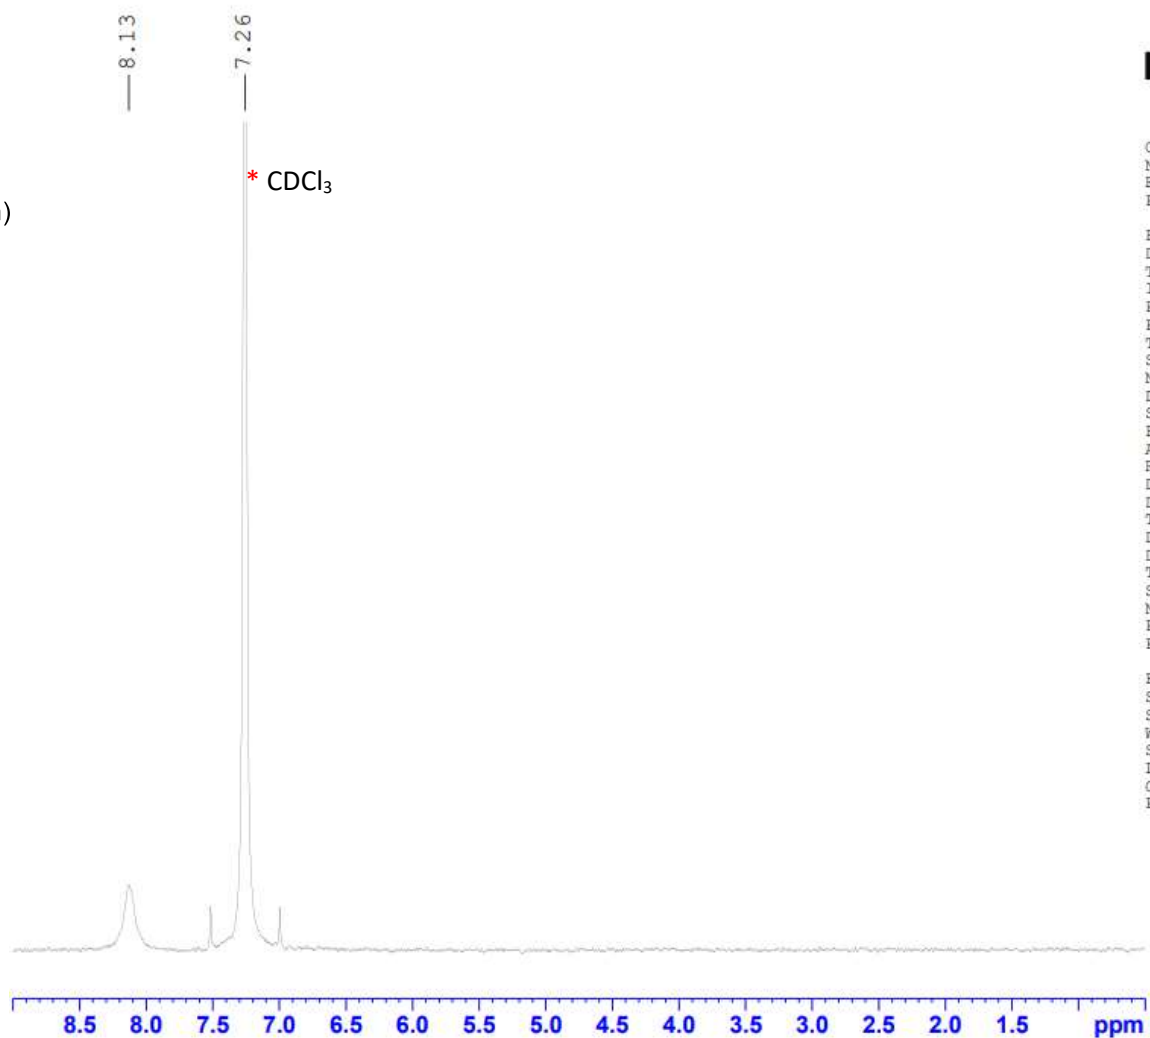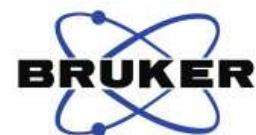

Current Data Parameters

NAME  
EXPNO 3  
PROCNO 1

F2 - Acquisition Parameters

Date\_ 20201215  
Time 14.27 h  
INSTRUM AV Neo 400, Puma  
PROBHD Z116098 0631 (  
PULPROG zg2h  
TD 16384  
SOLVENT D2O  
NS 500  
DS 0  
SWH 1562.500 Hz  
FIDRES 0.190735 Hz  
AQ 5.2428799 sec  
RG 101  
DW 320.000 usec  
DE 10.00 usec  
TE 298.0 K  
D1 1.00000000 sec  
D11 0.03000000 sec  
TD0 1  
SFO1 61.4139485 MHz  
NUC1 2H  
P1 355.00 usec  
PLW1 3.50000000 W

F2 - Processing parameters

SI 16384  
SF 61.4134792 MHz  
WDW EM  
SSB 0  
LB 0.30 Hz  
GB 0  
PC 1.00

# 9-(Triisopropylsilyl)-9H-carbazole [1a]

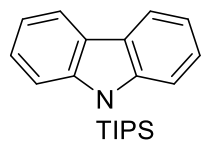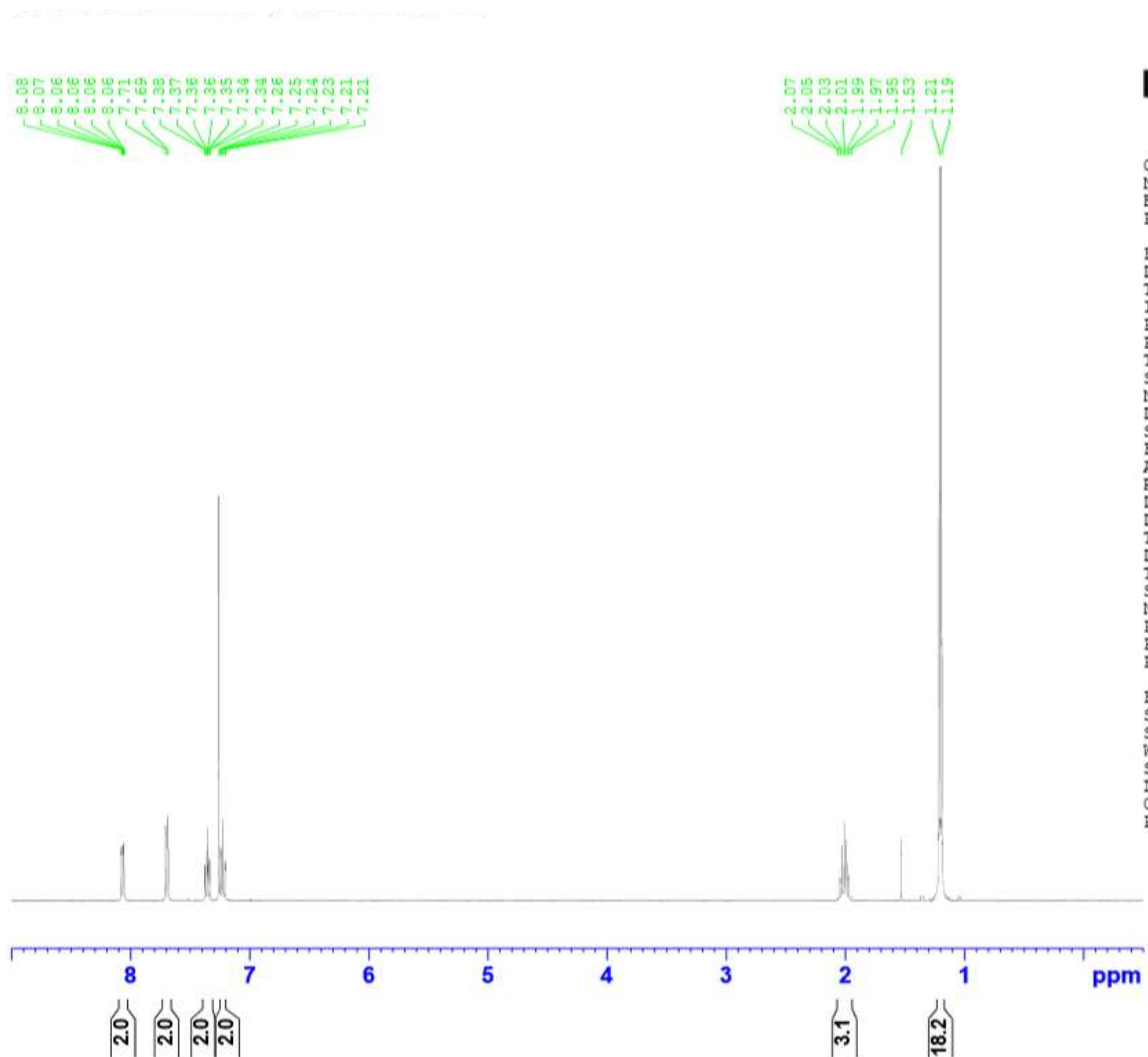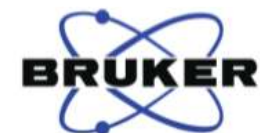

Current Data Parameters  
 NAME 9-(triisopropylsilyl  
 EXPNO 10  
 PROCNO 1

F2 - Acquisition Parameters  
 Date\_ 20210218  
 Time 17.14 h  
 INSTRUM AvanceNeo  
 PROBHD Z116098\_0793 (   
 PULPROG zg30  
 TD 65536  
 SOLVENT CDCl3  
 NS 4  
 DS 0  
 SWH 7142.857 Hz  
 FIDRES 0.217983 Hz  
 AQ 4.5875201 sec  
 RG 101  
 DW 70.000 usec  
 DE 14.80 usec  
 TE 298.0 K  
 D1 2.00000000 sec  
 TDO 1  
 SFO1 400.1324008 MHz  
 NUC1 1H  
 P0 3.13 usec  
 P1 9.40 usec  
 PLW1 18.69700050 W

F2 - Processing parameters  
 SI 131072  
 SF 400.1300101 MHz  
 WDW EM  
 SSB 0  
 LB 0.10 Hz  
 GB 0  
 PC 1.00

# 9-(Triisopropylsilyl)-9H-carbazole [1a]

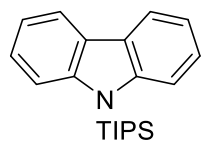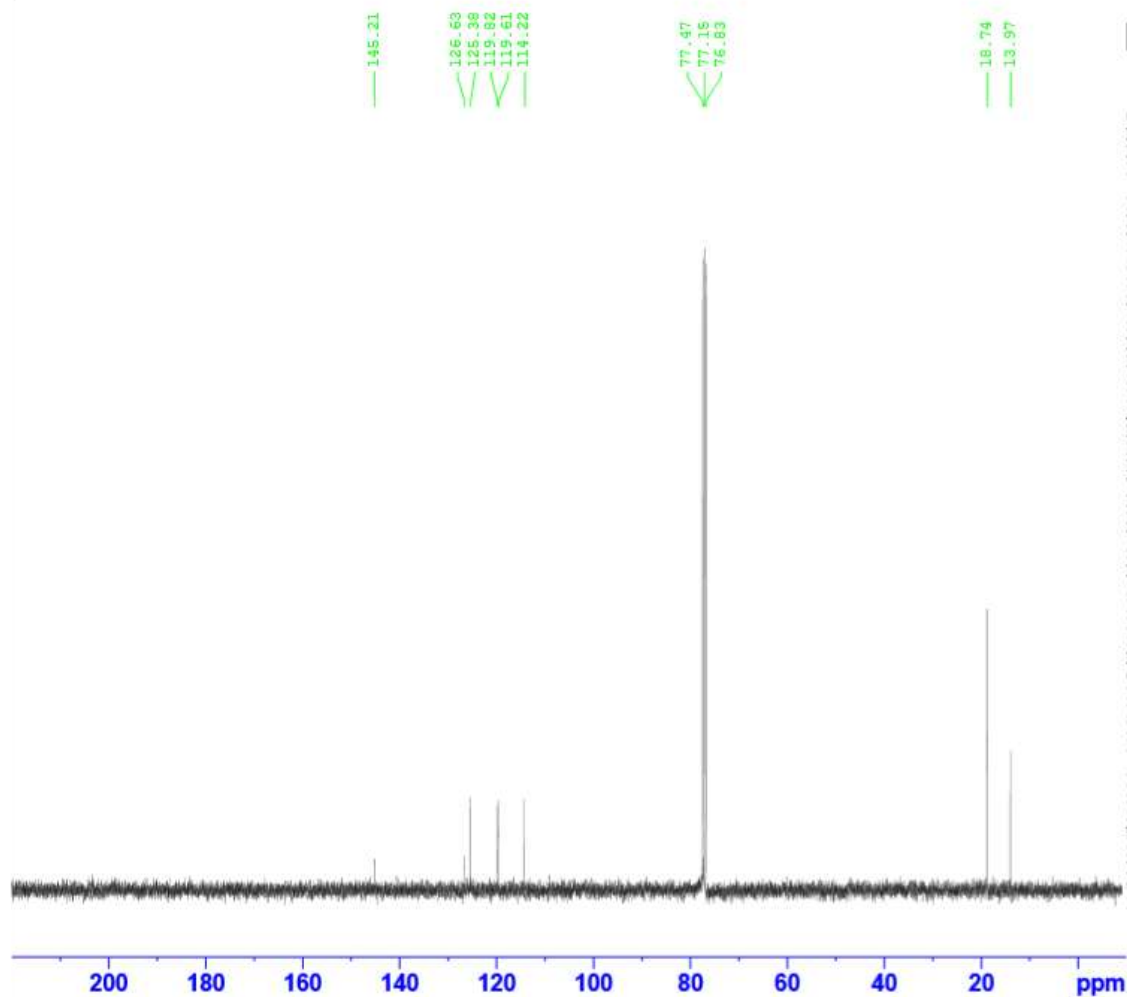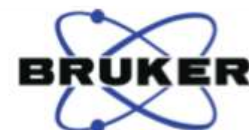

Current Data Parameters  
NAME 9-(triisopropylsilyl)  
EXPNO 11  
PROCNO 1

F2 - Acquisition Parameters  
Date\_ 20210219  
Time\_ 0.40 h  
INSTRUM AvanceNeo  
PROBHD Z116098\_0793 (   
PULPROG zgpg30  
TD 119044  
SOLVENT CDCl3  
NS 512  
DS 0  
SWH 25000.000 Hz  
FIDRES 0.420013 Hz  
AQ 2.3808801 sec  
RG 9.375  
DW 20.000 usec  
DE 7.12 usec  
TE 298.0 K  
D1 1.00000000 sec  
D11 0.03000000 sec  
TD0 1  
SFO1 100.6243390 MHz  
NUC1 13C  
P0 3.33 usec  
P1 10.00 usec  
PLW1 83.92700195 W  
SFO2 400.1318006 MHz  
NUC2 1H  
CPDPRG2 waltz64  
PCPD2 90.00 usec  
PLW2 18.69700050 W  
PLW12 0.20396000 W  
PLW13 0.10259000 W

F2 - Processing parameters  
SI 131072  
SF 100.6127556 MHz  
WDW EM  
SSB 0  
LB 1.00 Hz  
GB 0  
PC 1.40

# 9-(Triethylsilyl)-9H-carbazole [1c]

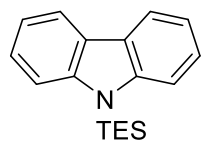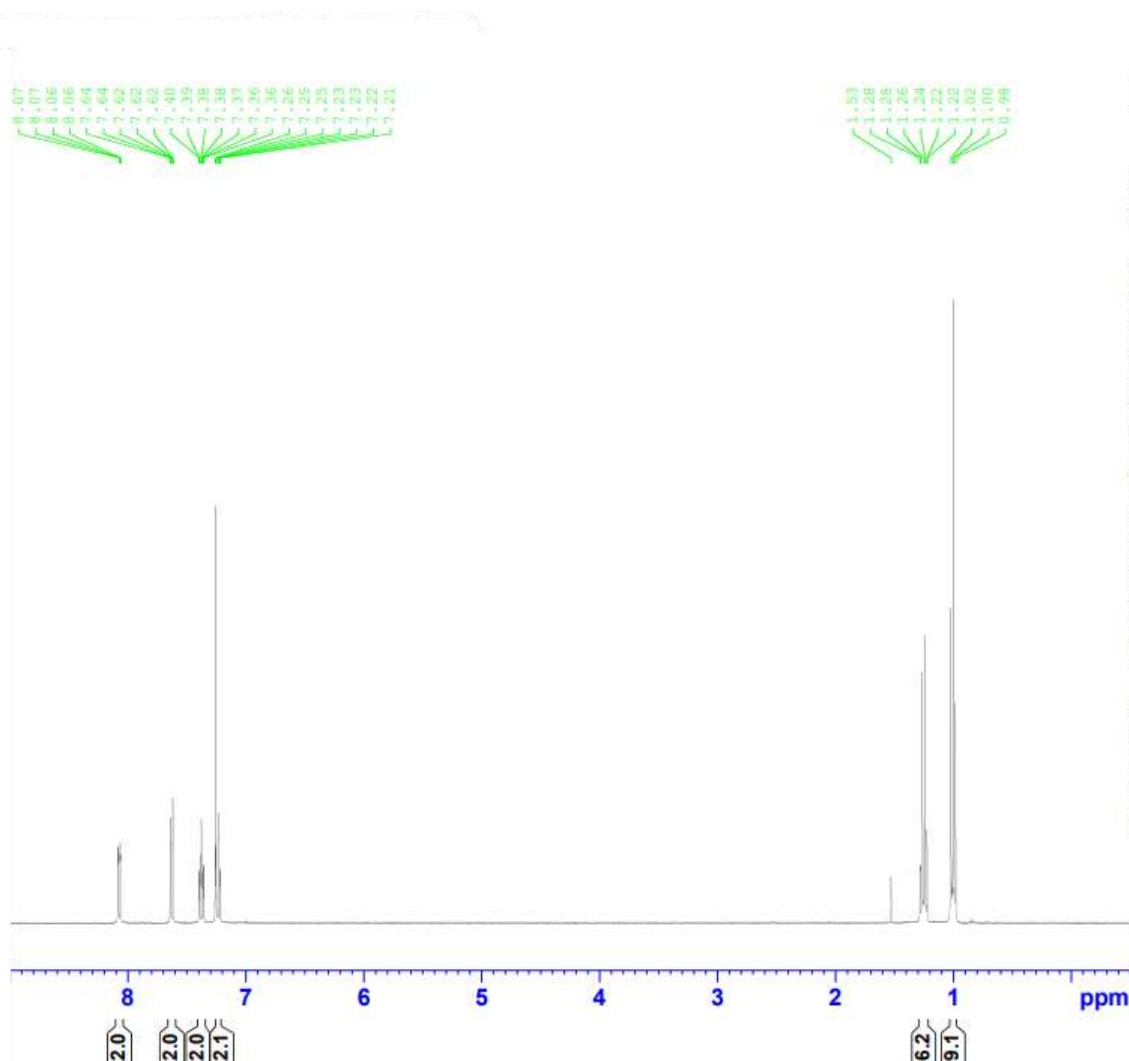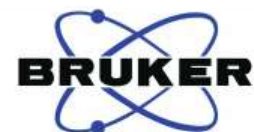

Current Data Parameters  
NAME 9-(triethylsilyl)-  
EXPNO 10  
PROCNO 1

F2 - Acquisition Parameters  
Date\_ 20210218  
Time\_ 17.22 h  
INSTRUM AvanceNeo  
PROBHD Z116098\_0793 (   
PULPROG zg30  
TD 65536  
SOLVENT CDC13  
NS 4  
DS 0  
SWH 7142.857 Hz  
FIDRES 0.217983 Hz  
AQ 4.5875201 sec  
RG 101  
DW 70.000 usec  
DE 14.80 usec  
TE 298.0 K  
D1 2.00000000 sec  
TD0 1  
SFO1 400.1324008 MHz  
NUC1 1H  
P0 3.13 usec  
P1 9.40 usec  
PLW1 18.69700050 W

F2 - Processing parameters  
SI 131072  
SF 400.1300099 MHz  
WDW EM  
SSB 0  
LB 0.10 Hz  
GB 0  
PC 1.00

# 9-(Triethylsilyl)-9H-carbazole [1c]

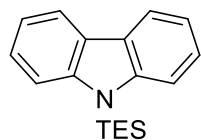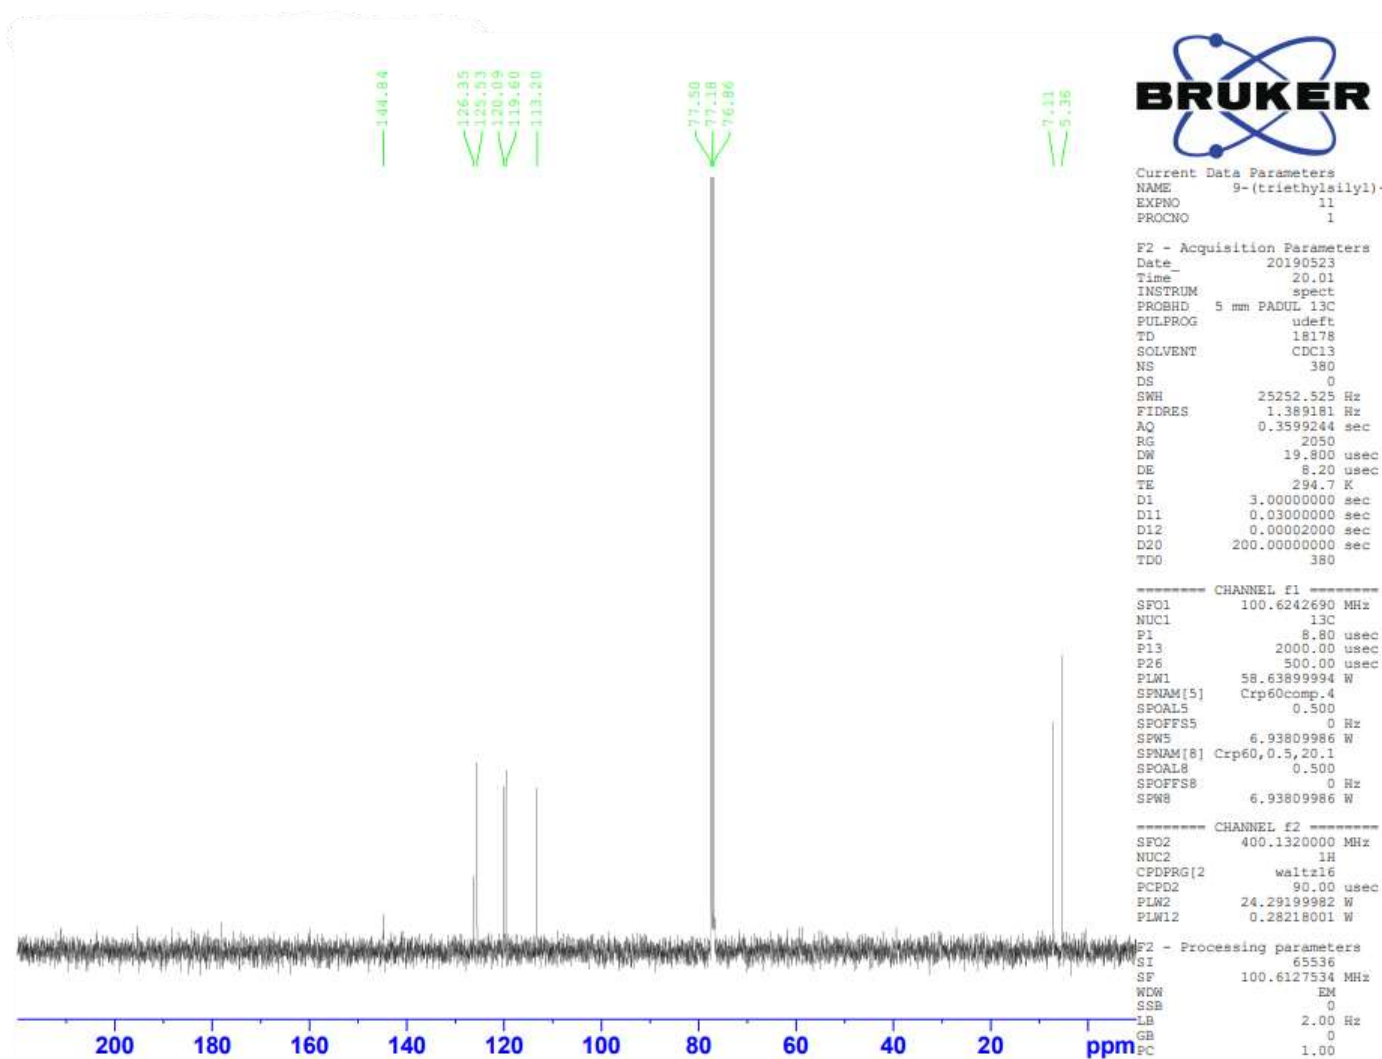

9-(*tert*-Butyldimethylsilyl)-9H-carbazole [1d]

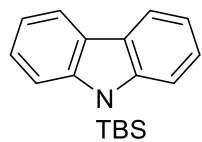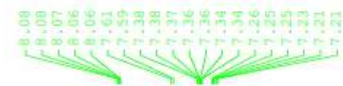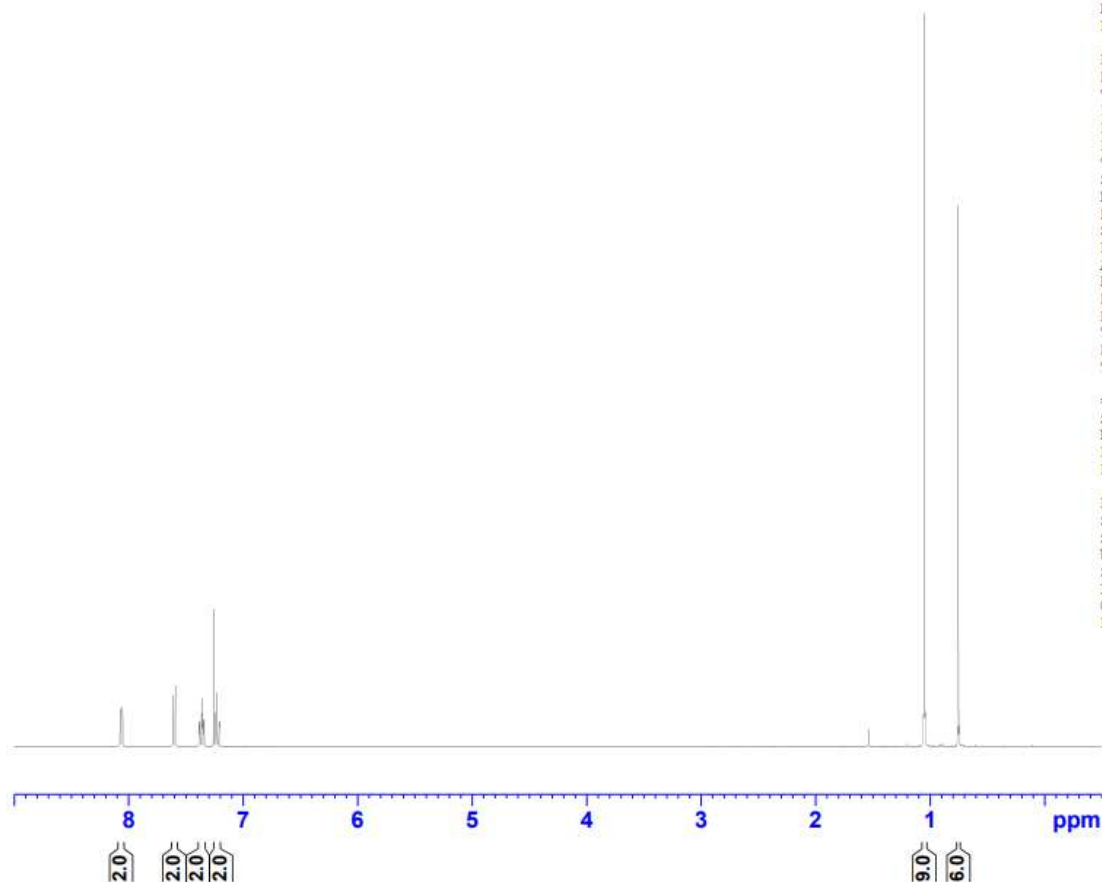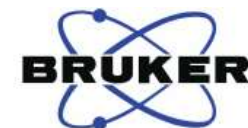

Current Data Parameters

NAME  
EXPNO 11  
PROCNO 1

F2 - Acquisition Parameters

Date\_ 20210430  
Time 3.42  
INSTRUM spect  
PROBHD 5 mm PADUL 13C  
PULPROG zg  
TD 32768  
SOLVENT CDCl3  
NS 64  
DS 2  
SWH 8223.685 Hz  
FIDRES 0.250967 Hz  
AQ 1.9922944 sec  
RG 203  
DW 60.800 usec  
DE 11.93 usec  
TE 294.5 K  
D1 15.00000000 sec  
TD0 1

===== CHANNEL f1 =====  
SFO1 400.1324008 MHz  
NUC1 1H  
P1 11.06 usec  
PLW1 24.29199982 W

F2 - Processing parameters

SI 32768  
SF 400.1300100 MHz  
WDW EM  
SSB 0  
LB 0.30 Hz  
GB 0  
PC 1.00

9-(*tert*-Butyldimethylsilyl)-9H-carbazole [1d]

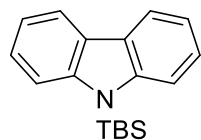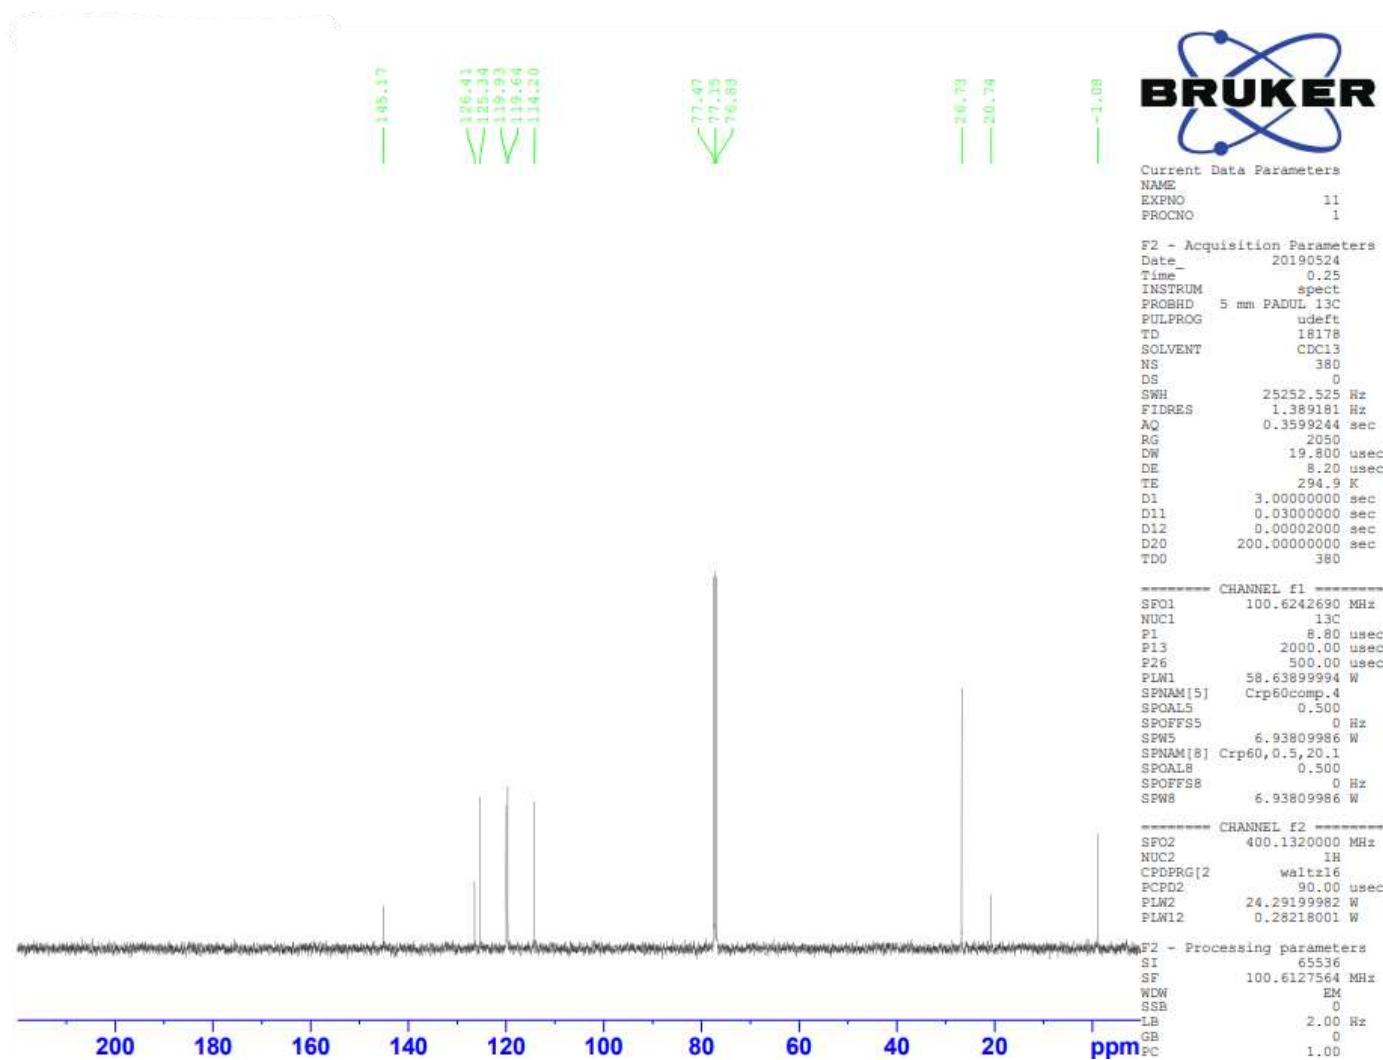

# 4,5-Dimethyl-9-(triisopropylsilyl)-9H-carbazole [2a]

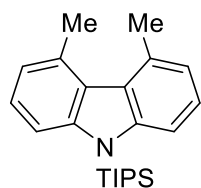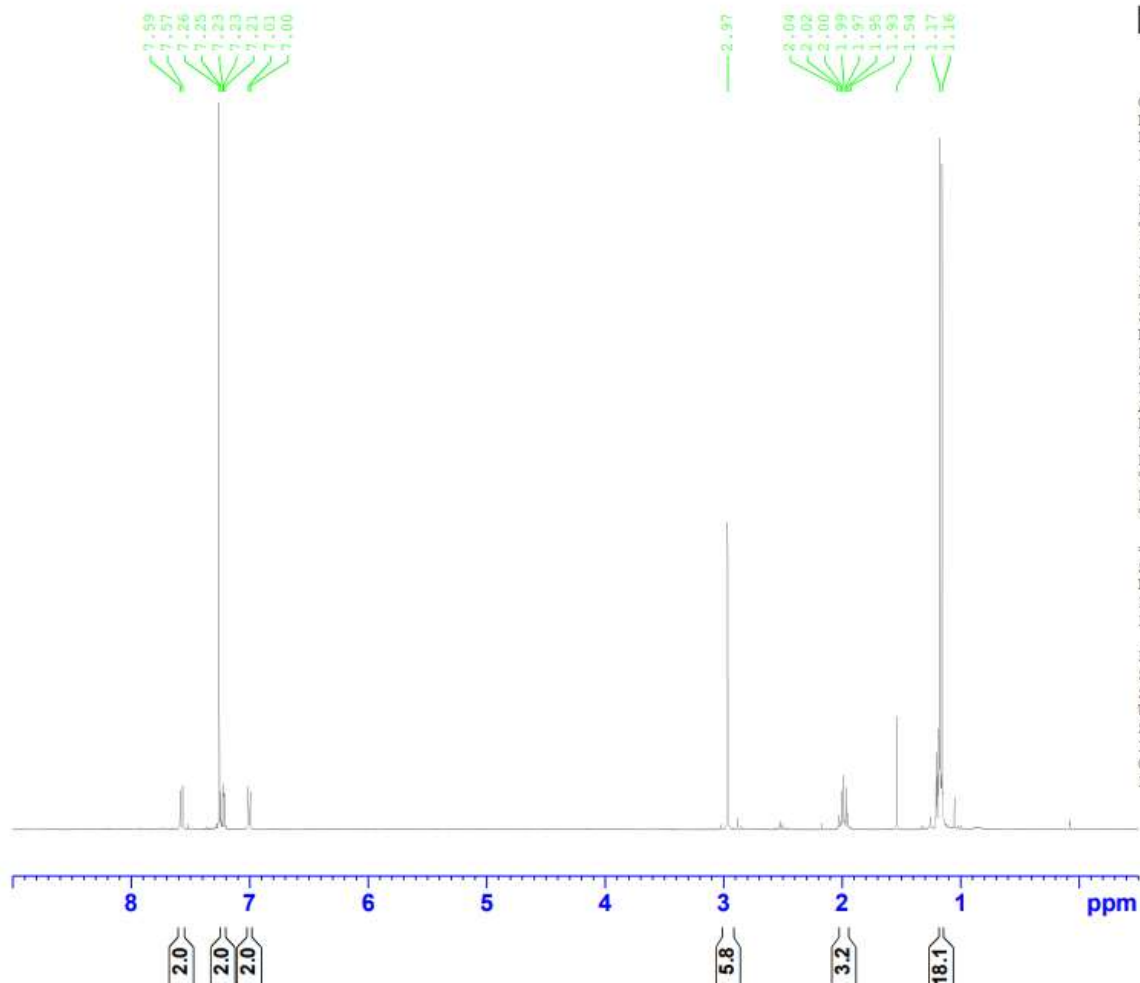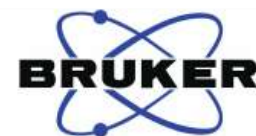

Current Data Parameters  
NAME  
EXPNO 101  
PROCNO 1

F2 - Acquisition Parameters  
Date 20210326  
Time 18.23  
INSTRUM spect  
PROBHD 5 mm PADUL 13C  
PULPROG zg30  
TD 32768  
SOLVENT CDCl3  
NS 32  
DS 2  
SWH 8223.685 Hz  
FIDRES 0.250967 Hz  
AQ 1.9922944 sec  
RG 912  
DW 60.800 usec  
DE 16.65 usec  
TE 294.7 K  
D1 1.50000000 sec  
TD0 1

===== CHANNEL f1 =====  
SFO1 400.1324008 MHz  
NUC1 1H  
P1 11.06 usec  
PLW1 24.29199982 W

F2 - Processing parameters  
SI 32768  
SF 400.1300105 MHz  
WDW EM  
SSB 0  
LB 0.30 Hz  
GB 0  
PC 1.00

# 4,5-Dimethyl-9-(triisopropylsilyl)-9H-carbazole [2a]

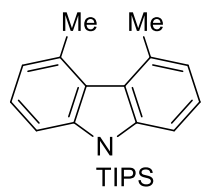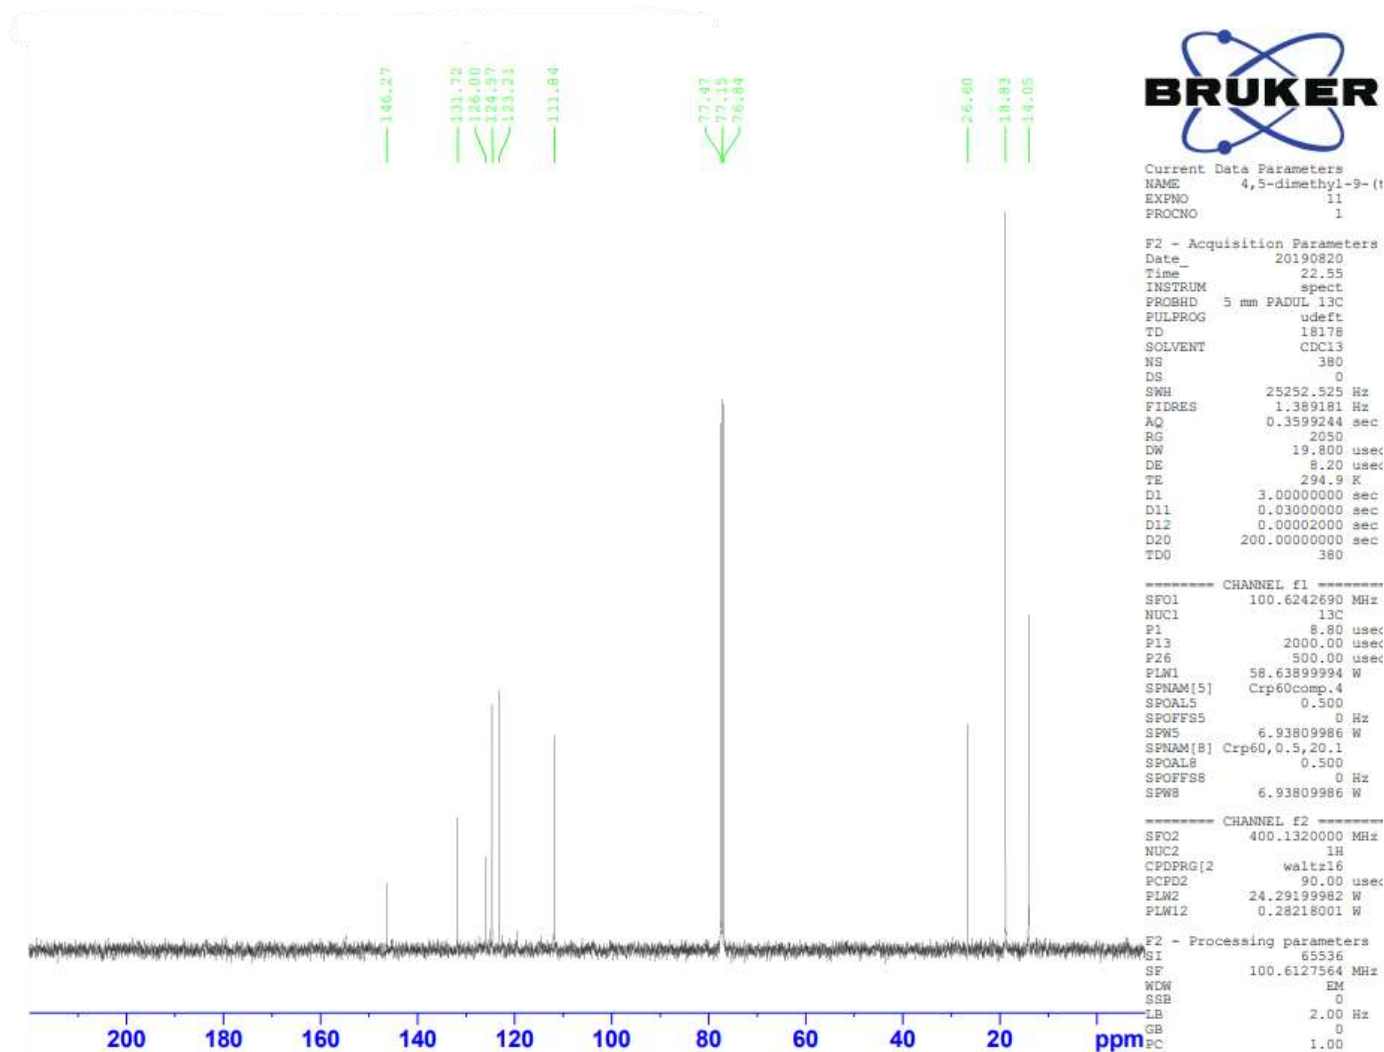

**(9-(Triisopropylsilyl)-9H-carbazole-4,5-diyl)dimethanol [3a]**

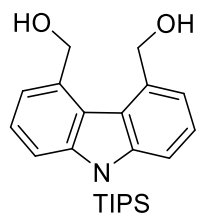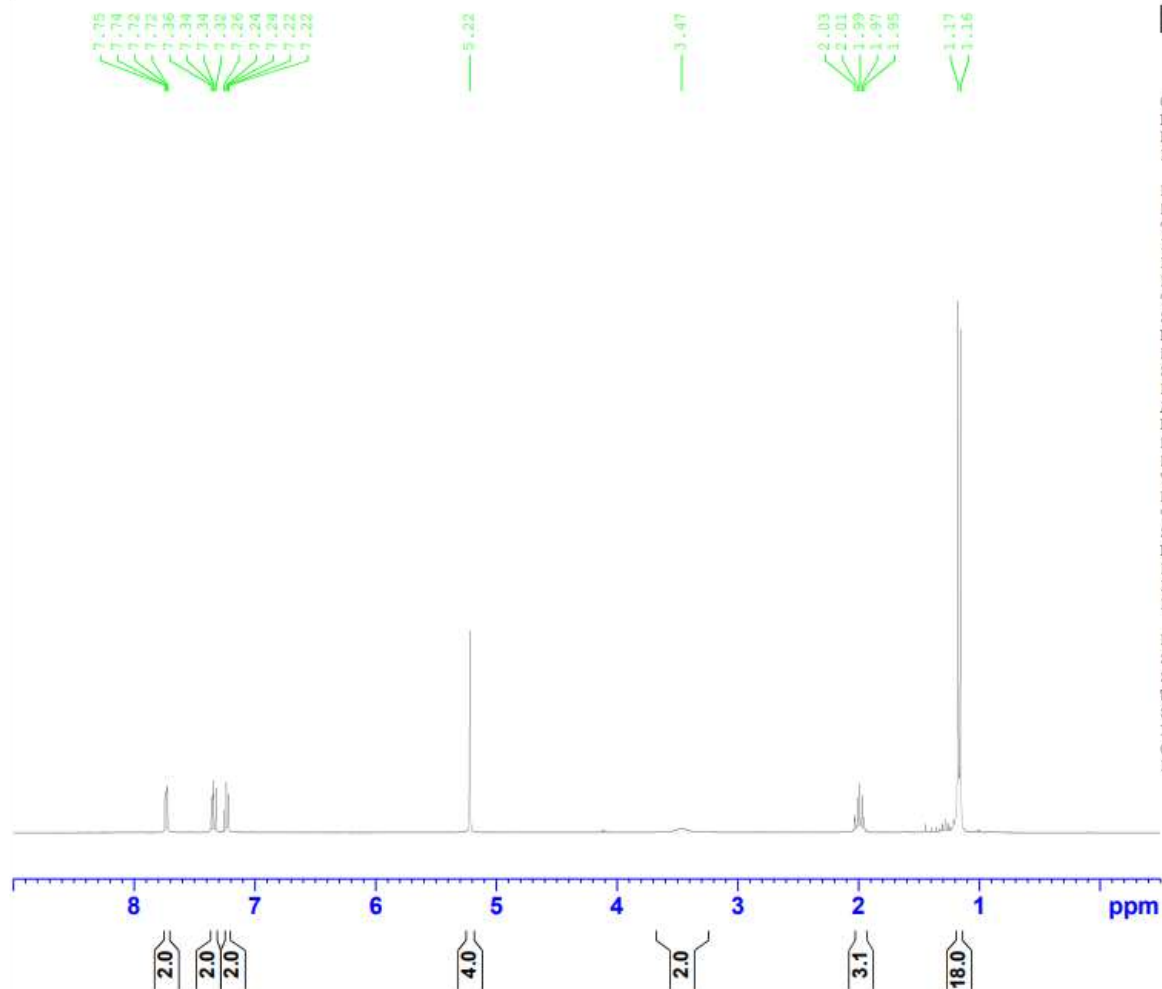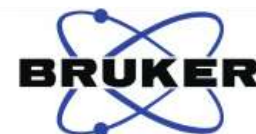

Current Data Parameters  
NAME  
EXPNO 10  
PROCNO 1

F2 - Acquisition Parameters  
Date\_ 20200115  
Time 12.14 h  
INSTRUM AvanceNeo  
PROBHD Z116098\_0793 (   
PULPROG zg30  
TD 65536  
SOLVENT CDCl3  
NS 4  
DS 0  
SWH 7142.857 Hz  
FIDRES 0.217983 Hz  
AQ 4.5875201 sec  
RG 32  
DW 70.000 usec  
DE 14.80 usec  
TE 298.0 K  
D1 2.00000000 sec  
TD0 1  
SFO1 400.1324008 MHz  
NUC1 1H  
P0 3.13 usec  
P1 9.40 usec  
PLW1 18.69700050 W

F2 - Processing parameters  
SI 131072  
SF 400.1300100 MHz  
WDW EM  
SSB 0  
LB 0.10 Hz  
GB 0  
PC 1.00

**(9-(Triisopropylsilyl)-9H-carbazole-4,5-diyl)dimethanol [3a]**

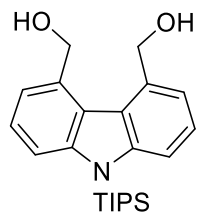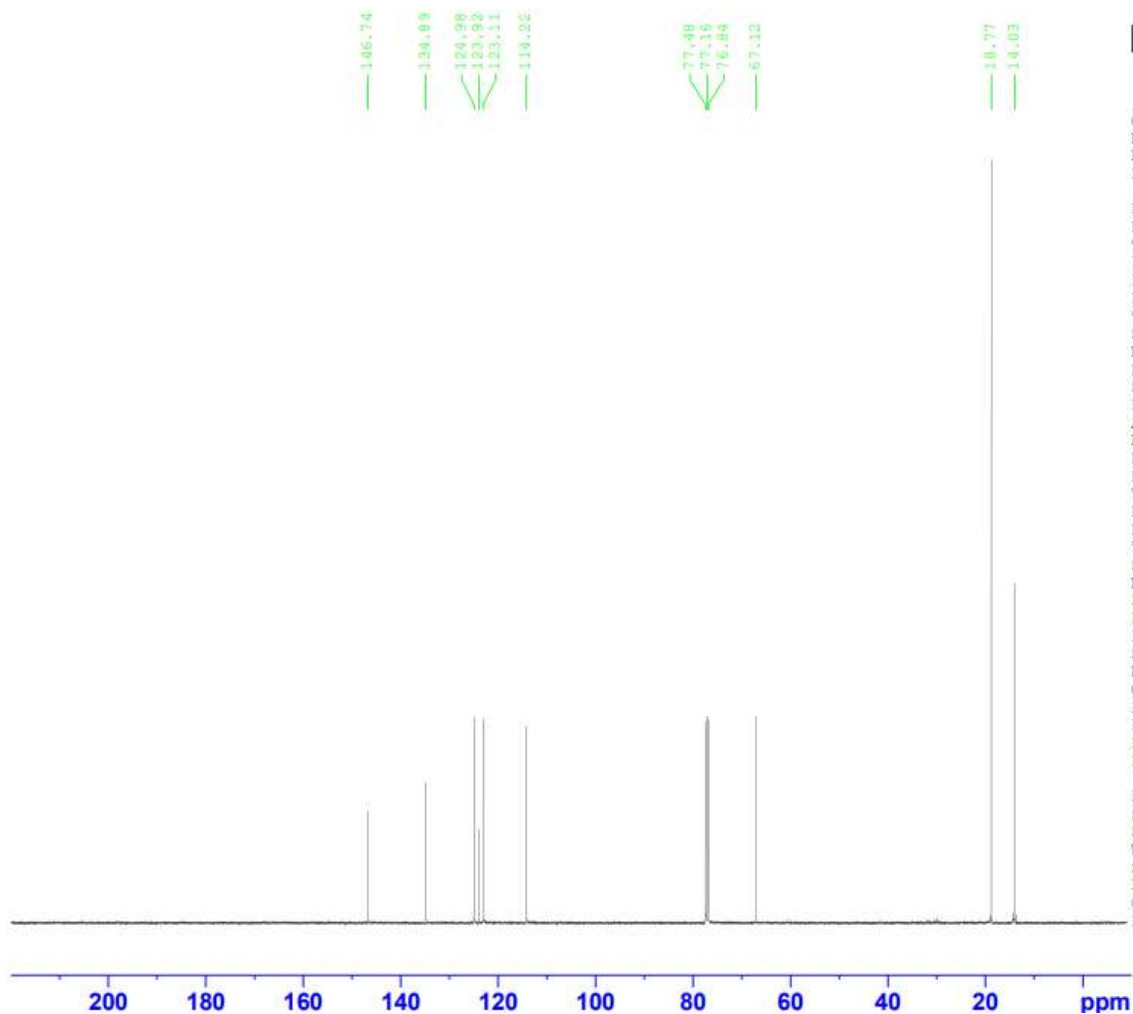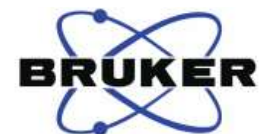

Current Data Parameters  
NAME  
EXPNO 11  
PROCNO 1

F2 - Acquisition Parameters  
Date 20200115  
Time 18.10 h  
INSTRUM AvanceNeo  
PROBHD Z116098\_0793 (   
PULPROG zgpg30  
TD 119044  
SOLVENT CDCl3  
NS 512  
DS 0  
SWH 25000.000 Hz  
FIDRES 0.420013 Hz  
AQ 2.3808801 sec  
RG 31.9602  
DW 20.000 usec  
DE 7.12 usec  
TE 298.0 K  
D1 1.00000000 sec  
D11 0.03000000 sec  
TD0 1  
SFO1 100.6243390 MHz  
NUC1 13C  
P0 3.33 usec  
P1 10.00 usec  
PLW1 83.92700195 W  
SFO2 400.1318006 MHz  
NUC2 1H  
CPDPRG[2] waltz64  
PCPD2 90.00 usec  
PLW2 18.69700050 W  
PLW12 0.20396000 W  
PLW13 0.10259000 W

F2 - Processing parameters  
SI 131072  
SF 100.6127598 MHz  
WDW EM  
SSB 0  
LB 1.00 Hz  
GB 0  
PC 1.40

4-(Triisopropylsilyl)-4H-oxepino[3,4,5,6-def]carbazole-8,10-dione [4a]

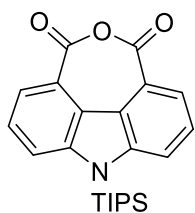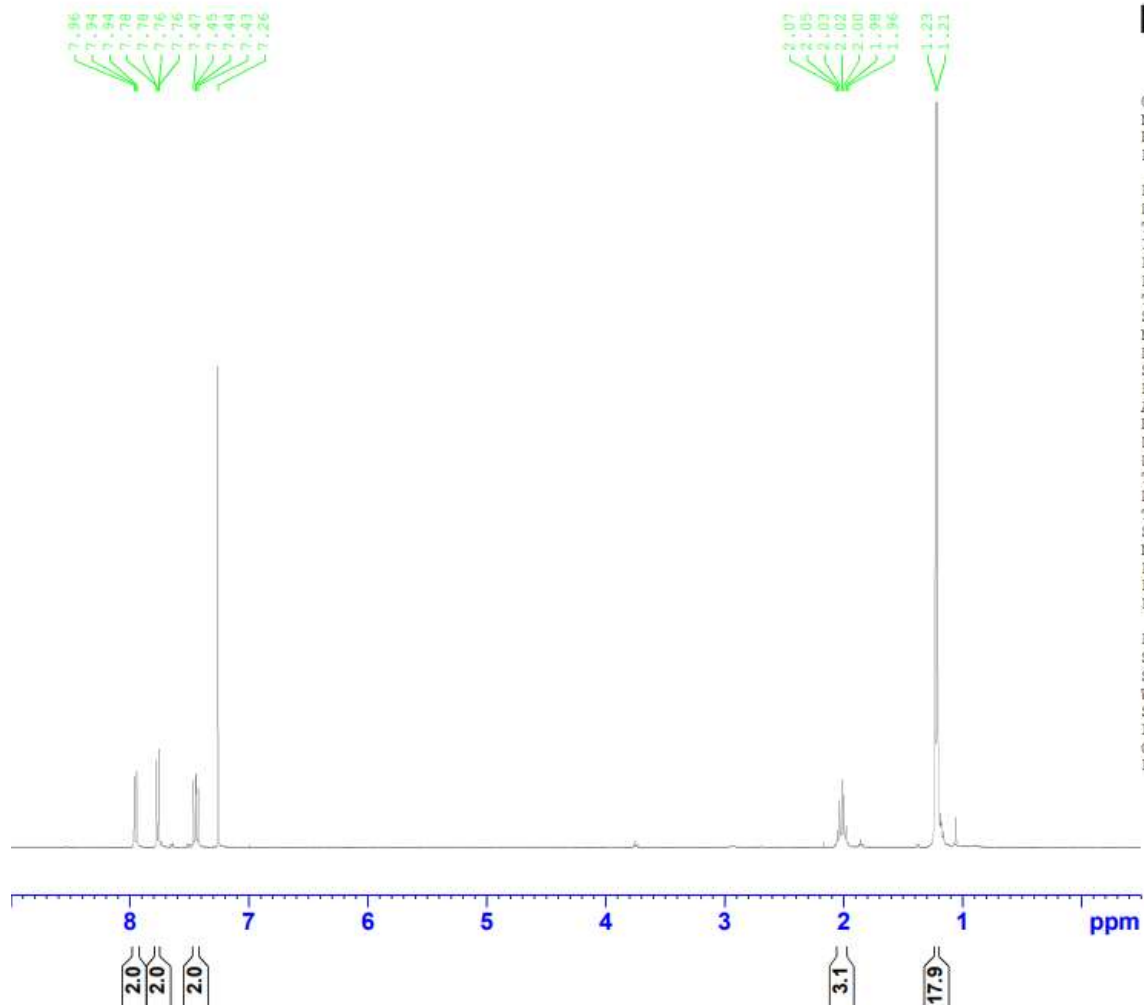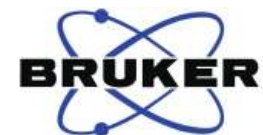

Current Data Parameters

NAME  
EXPNO 10  
PROCNO 1

F2 - Acquisition Parameters

Date\_ 20000114  
Time\_ 21.24 h  
INSTRUM AvanceNeo  
PROBHD Z116098\_0793 (   
PULPROG zg30  
TD 65536  
SOLVENT CDCl3  
NS 4  
DS 0  
SWH 7142.857 Hz  
FIDRES 0.217983 Hz  
AQ 4.5875201 sec  
RG 101  
DW 70.000 usec  
DE 14.80 usec  
TE 298.0 K  
D1 2.00000000 sec  
TD0 1  
SFO1 400.1324008 MHz  
NUC1 1H  
P0 3.13 usec  
P1 9.40 usec  
PLW1 18.69700050 W

F2 - Processing parameters

SI 131072  
SF 400.1300096 MHz  
WDW EM  
SSB 0  
LB 0.10 Hz  
GB 0  
PC 1.00

# 4-(Triisopropylsilyl)-4H-oxepino[3,4,5,6-def]carbazole-8,10-dione [4a]

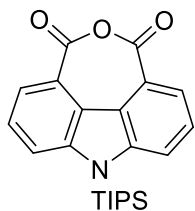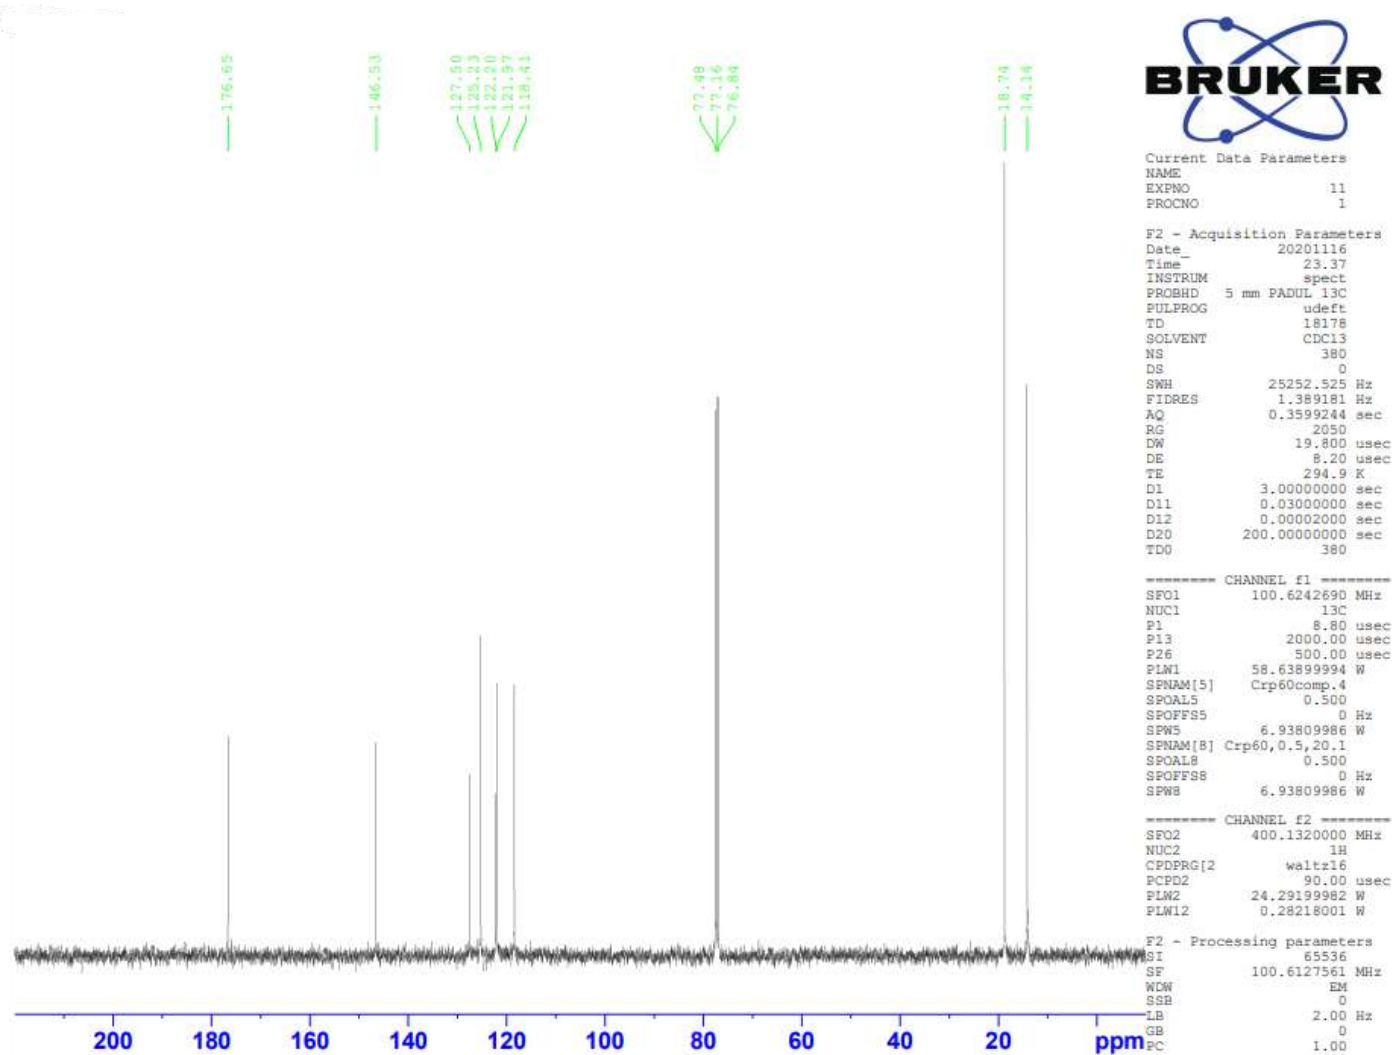

**8,9,10,11-Tetrafluoro-4-(triisopropylsilyl)-4H-naphtho[1,2,3,4-def]carbazole [5a]**

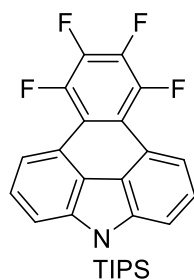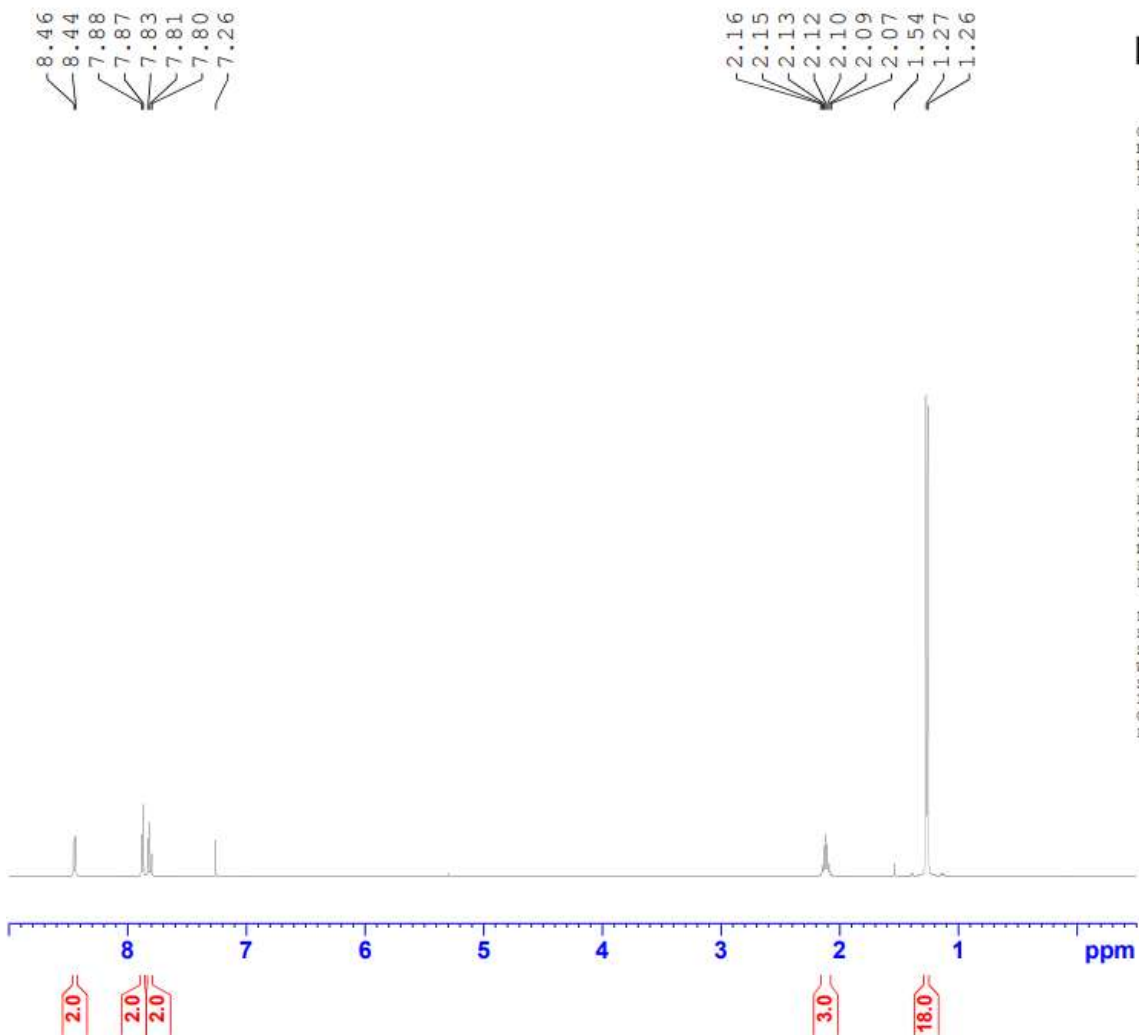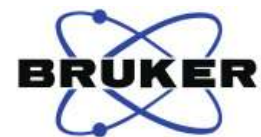

Current Data Parameters

NAME  
EXPNO 10  
PROCNO 1

F2 - Acquisition Parameters

Date\_ 20210315  
Time 17.38 h  
INSTRUM CAB AV4 500 MHZ BASIC  
PROBHD Z150364\_0007 (   
PULPROG zg  
TD 66560  
SOLVENT CDCl3  
NS 16  
DS 0  
SWH 10416.667 Hz  
FIDRES 0.313001 Hz  
AQ 3.1948800 sec  
RG 76.9231  
DW 48.000 usec  
DE 34.36 usec  
TE 298.0 K  
D1 10.00000000 sec  
TD0 1  
SFO1 500.0760004 MHz  
NUC1 1H  
P1 12.00 usec  
PLW1 14.55099964 W

F2 - Processing parameters

SI 131072  
SF 500.0730123 MHz  
WDW EM  
SSB 0  
LB 0.10 Hz  
GB 0  
PC 1.00

**8,9,10,11-Tetrafluoro-4-(triisopropylsilyl)-4H-naphtho[1,2,3,4-def]carbazole [5a]**

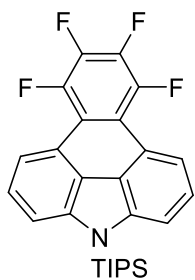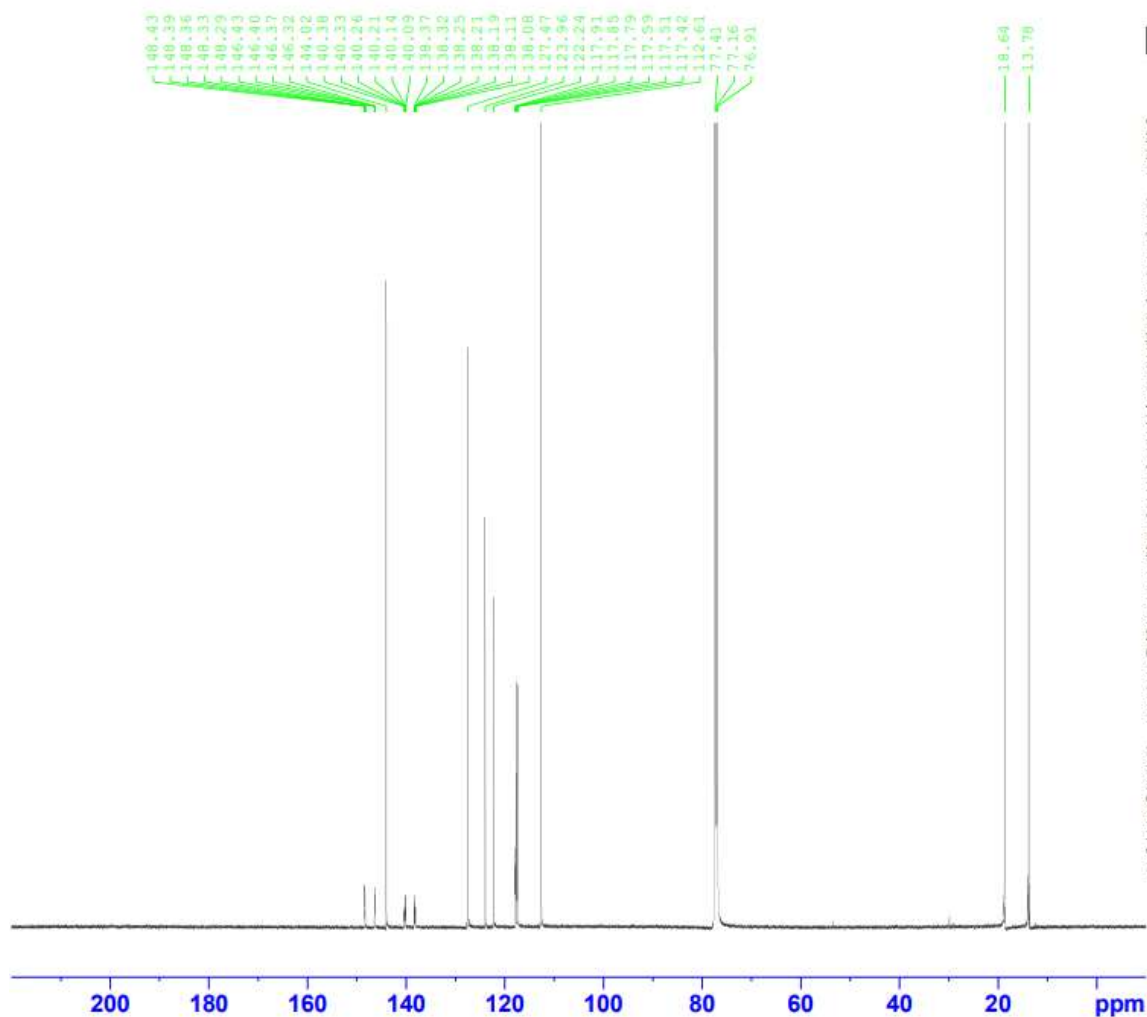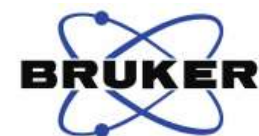

**Current Data Parameters**

```

NAME
EXPNO 11
PROCNO 1

F2 - Acquisition Parameters
Date_ 20210317
Time 7.24 h
INSTRUM CAB AV4 500 MHZ BASIC
PROBHD Z150364_0007 (
PULPROG zgpg30
TD 119044
SOLVENT CDCl3
NS 4000
DS 0
SWH 31250.000 Hz
FIDRES 0.525016 Hz
AQ 1.9047040 sec
RG 101
DW 16.000 usec
DE 18.29 usec
TE 298.0 K
D1 32.00000000 sec
D11 0.03000000 sec
TD0 1
SFO1 125.7572860 MHz
NUC1 13C
P0 3.33 usec
P1 10.00 usec
PLW1 61.18099976 W
SFO2 500.0750003 MHz
NUC2 1H
CPDPRG2 waltz64
PCPD2 80.00 usec
PLW2 14.55099964 W
PLW12 0.32740000 W
PLW13 0.16468000 W

F2 - Processing parameters
SI 131072
SF 125.7434386 MHz
WDW EM
SSB 0
LB 1.00 Hz
GB 0
PC 1.40
    
```

**8,9,10,11-Tetrafluoro-4-(triisopropylsilyl)-4H-naphtho[1,2,3,4-def]carbazole [5a]**

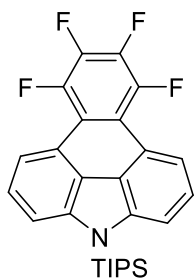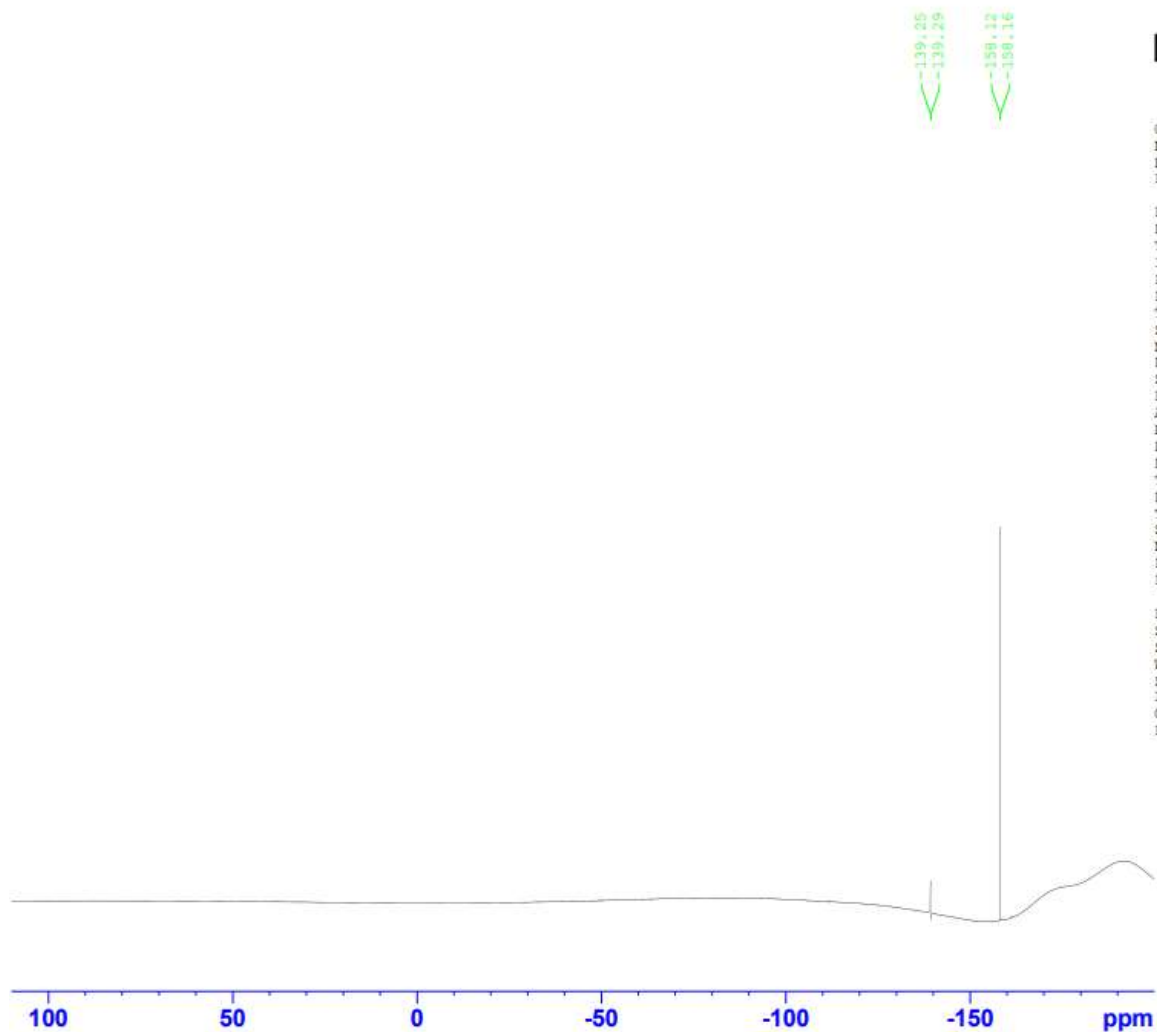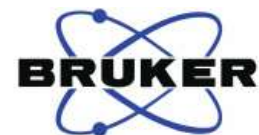

Current Data Parameters

NAME  
EXPNO 13  
PROCNO 1

F2 - Acquisition Parameters

Date 20210317  
Time 8.47 h  
INSTRUM CAB AV4 500 MHZ BASIC  
PROBHD Z150364\_0007 (   
PULPROG zg  
TD 134144  
SOLVENT CDCl3  
NS 32  
DS 0  
SWH 200000.000 Hz  
FIDRES 2.981870 Hz  
AQ 0.3353600 sec  
RG 40.6901  
DW 2.500 usec  
DE 18.00 usec  
TE 298.0 K  
D1 3.00000000 sec  
TD0 1  
SFO1 470.5387436 MHz  
NUC1 19F  
P1 15.00 usec  
PLW1 9.63220024 W

F2 - Processing parameters

SI 131072  
SF 470.5387436 MHz  
WDW EM  
SSB 0  
LB 2.00 Hz  
GB 0  
PC 1.00

# 4,5-Dichloro-9H-carbazole [6b]

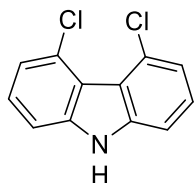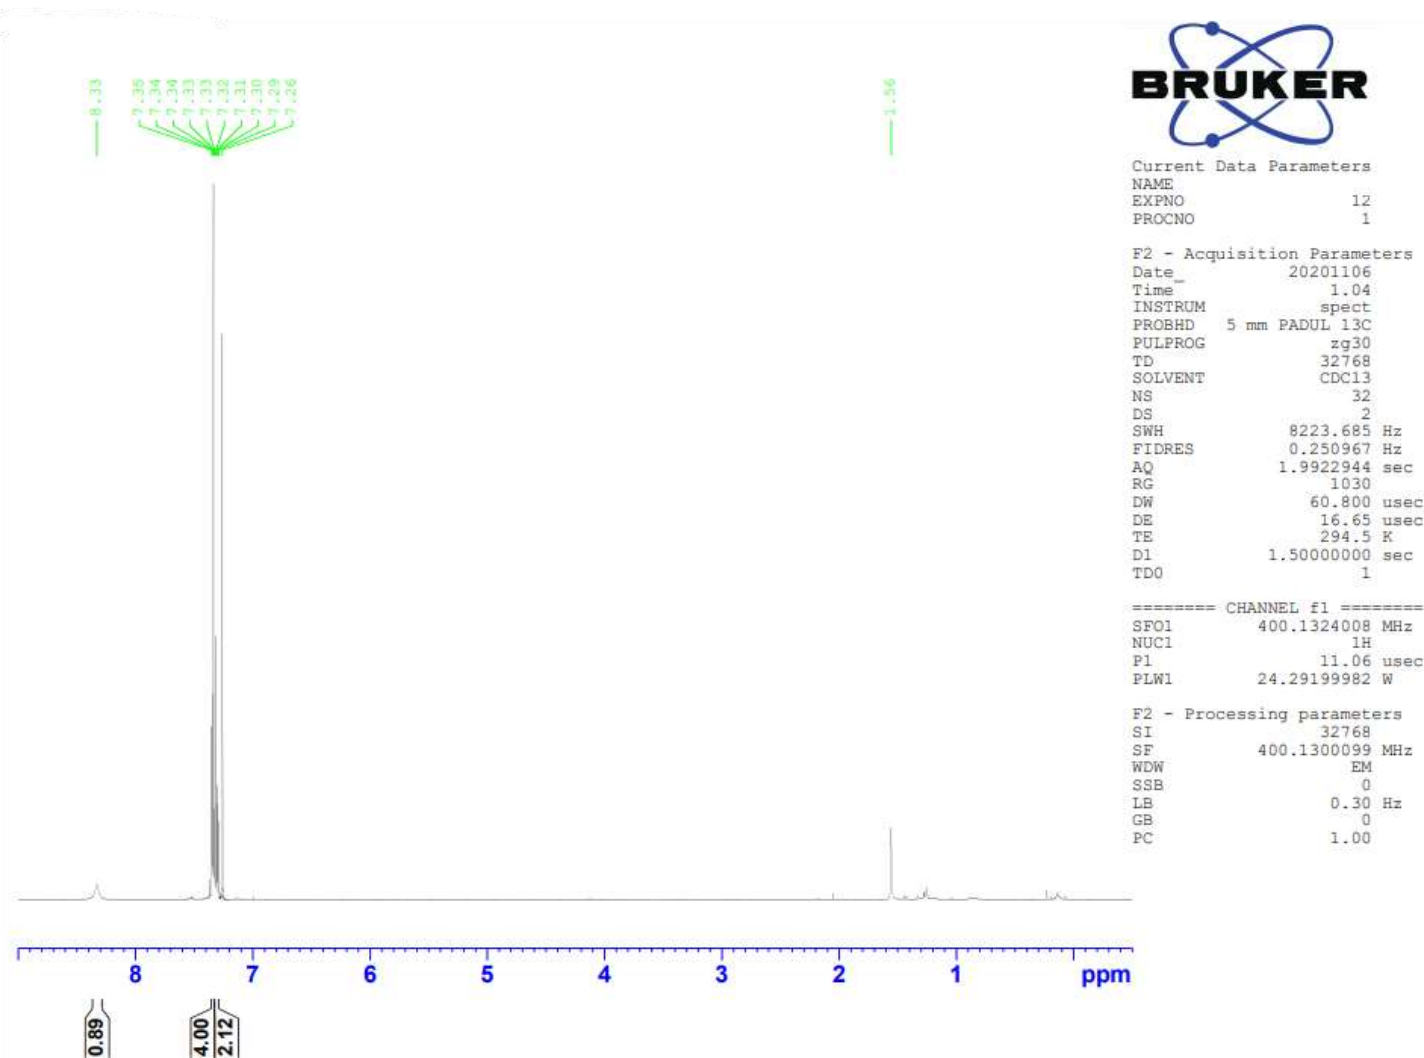

# 4,5-Dichloro-9H-carbazole [6b]

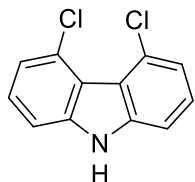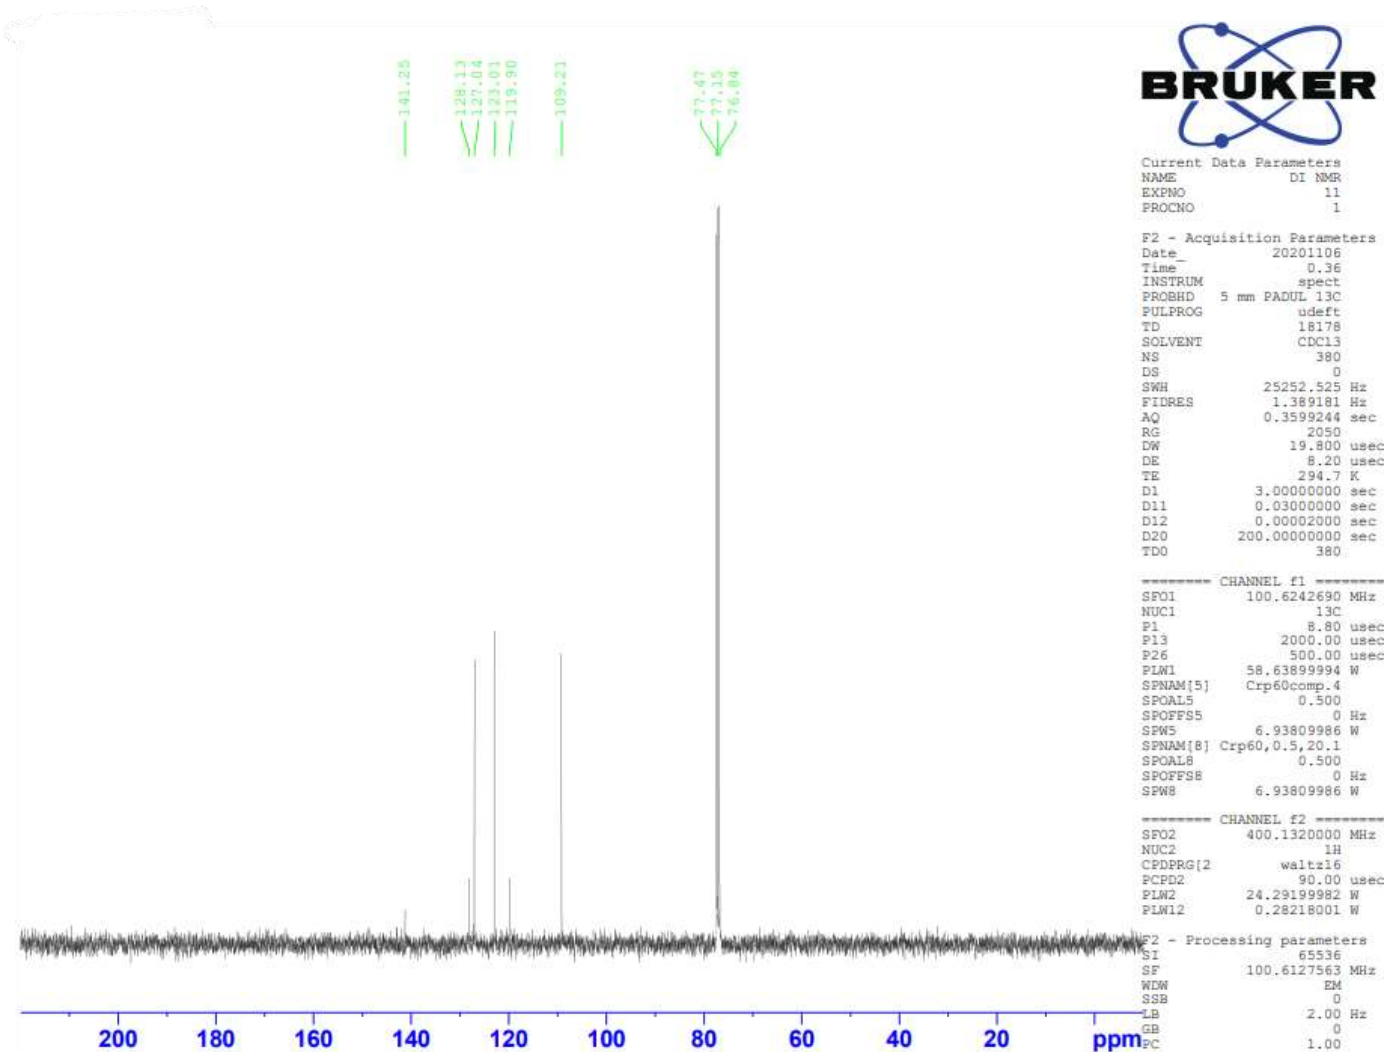

4-(Triisopropylsilyl)-4H-[1,2,7]oxadiborepino[3,4,5,6-def]carbazole-8,10-diol [7a]

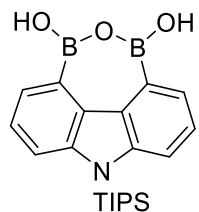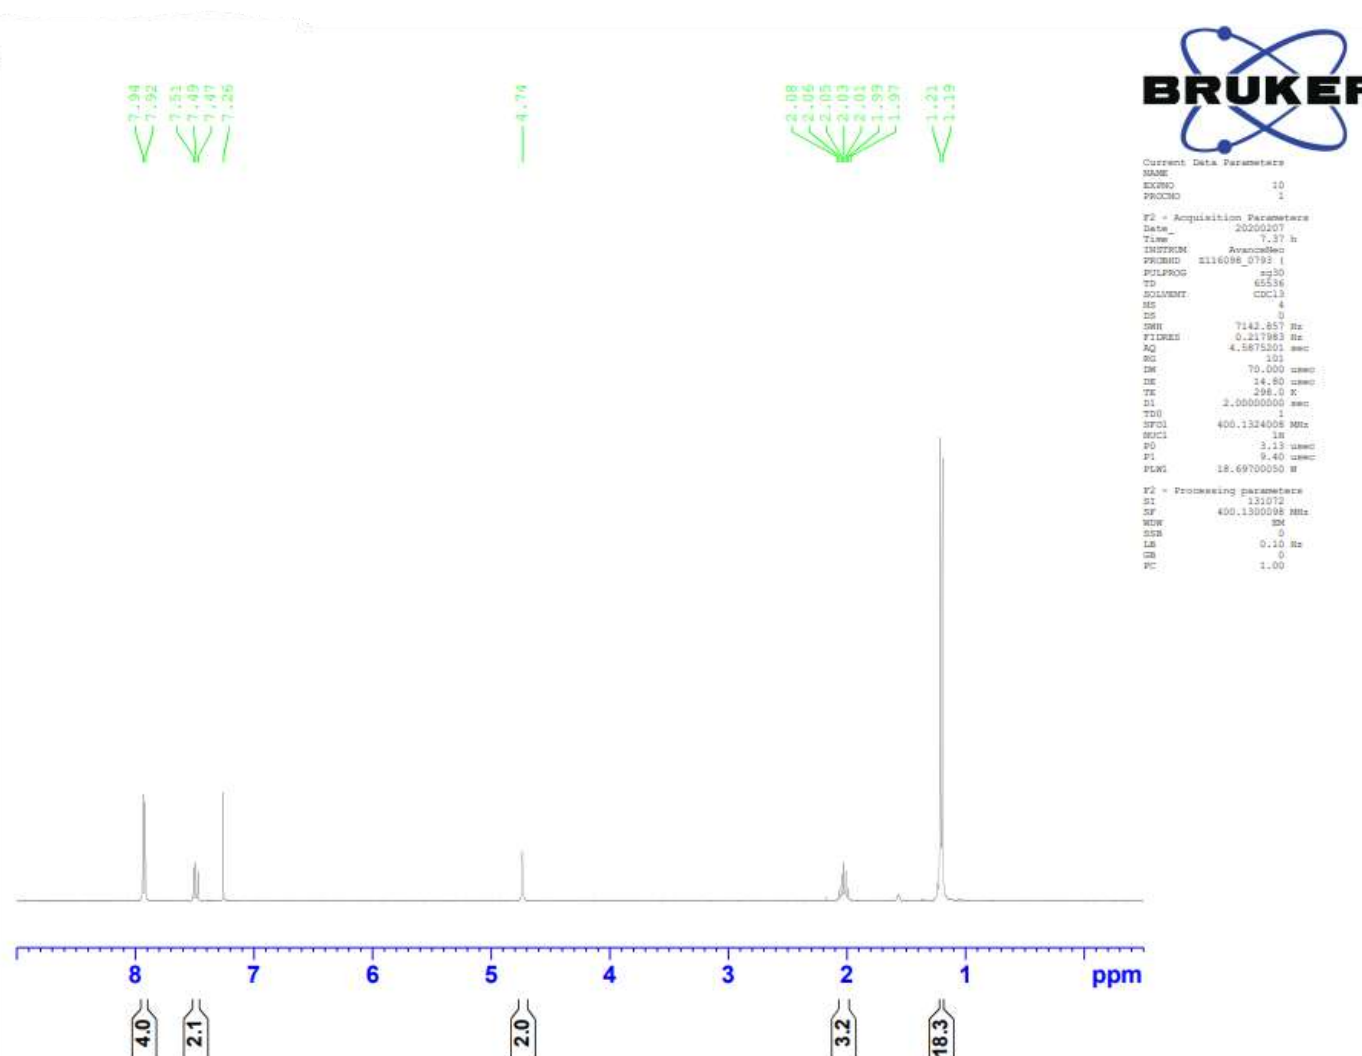

4-(Triisopropylsilyl)-4H-[1,2,7]oxadiborepino[3,4,5,6-def]carbazole-8,10-diol [7a]

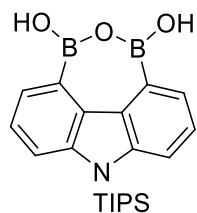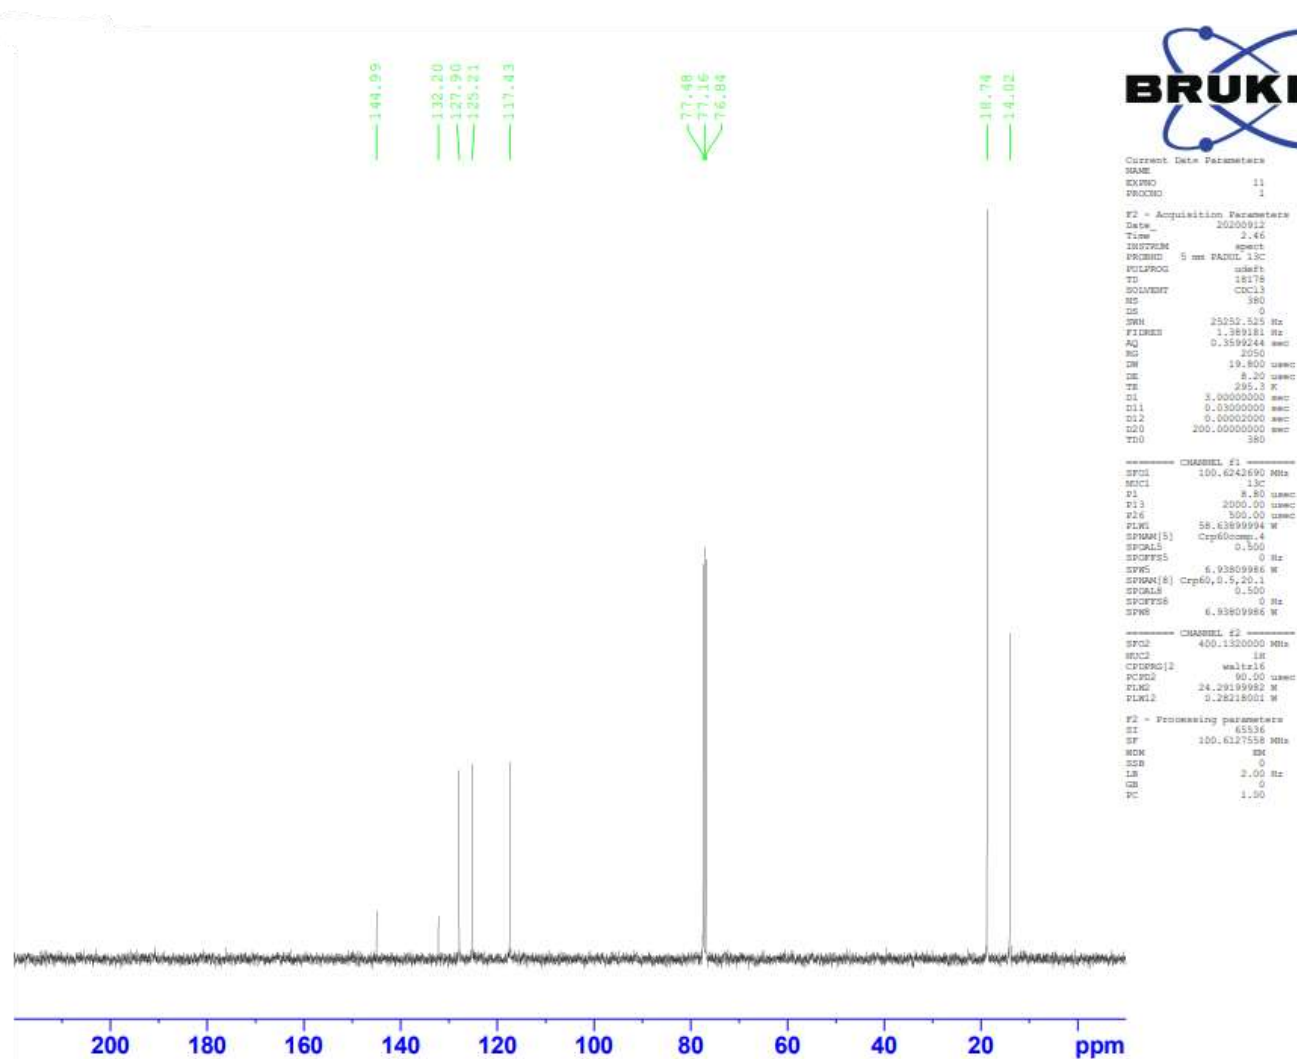

4-(Triisopropylsilyl)-4H-[1,2,7]oxadiborepino[3,4,5,6-def]carbazole-8,10-diol [7a]

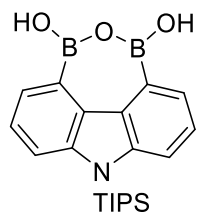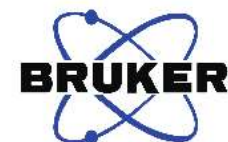

Current Data Parameters  
NAME AM70048-3  
EXPNO 13  
PROCNO 1

F2 - Acquisition Parameters  
Date\_ 20191026  
Time 3.27 h  
INSTRUM AvanceNeo  
PROBHD Z116098\_0793 (   
PULPROG zg30  
TD 65536  
SOLVENT CDCl3  
NS 400  
DS 0  
SWH 25006.736 Hz  
FIDRES 0.790611 Hz  
AQ 1.2648448 sec  
RG 101  
DW 19.300 usec  
DE 6.50 usec  
TE 298.0 K  
D1 1.00000000 sec  
TD0 1  
SF01 128.3776052 MHz  
NUC1 11B  
P0 2.97 usec  
P1 8.90 usec  
PLW1 80.00000000 W

F2 - Processing parameters  
SI 65536  
SF 128.3776052 MHz  
WDW EM  
SSB 0  
LB 1.00 Hz  
GB 0  
PC 1.40

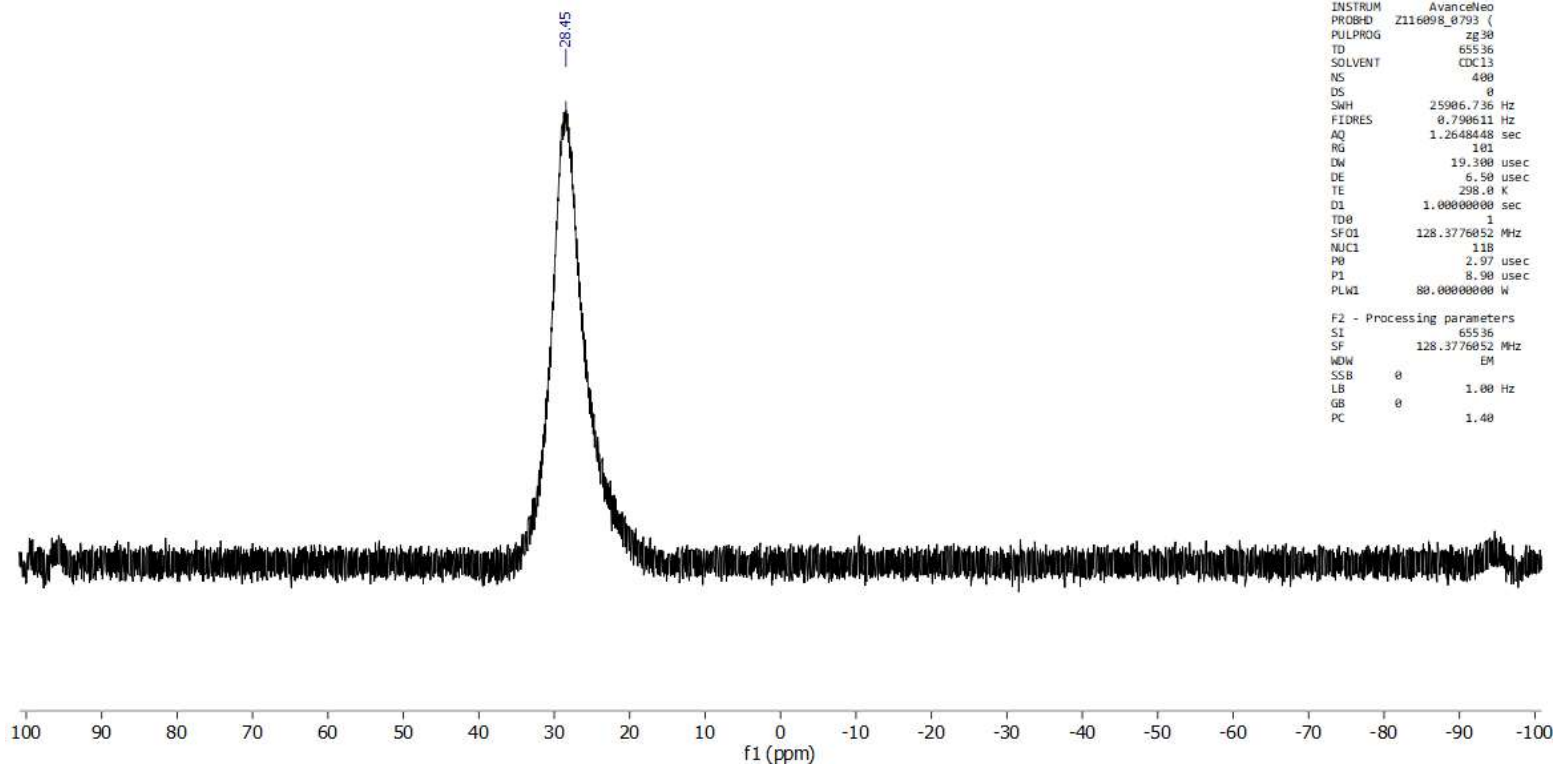

**8,8-Dimethyl-4-(triisopropylsilyl)-4,8-dihydrosilolo[2,3,4,5-def]carbazole [8a]**

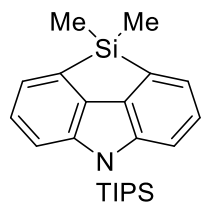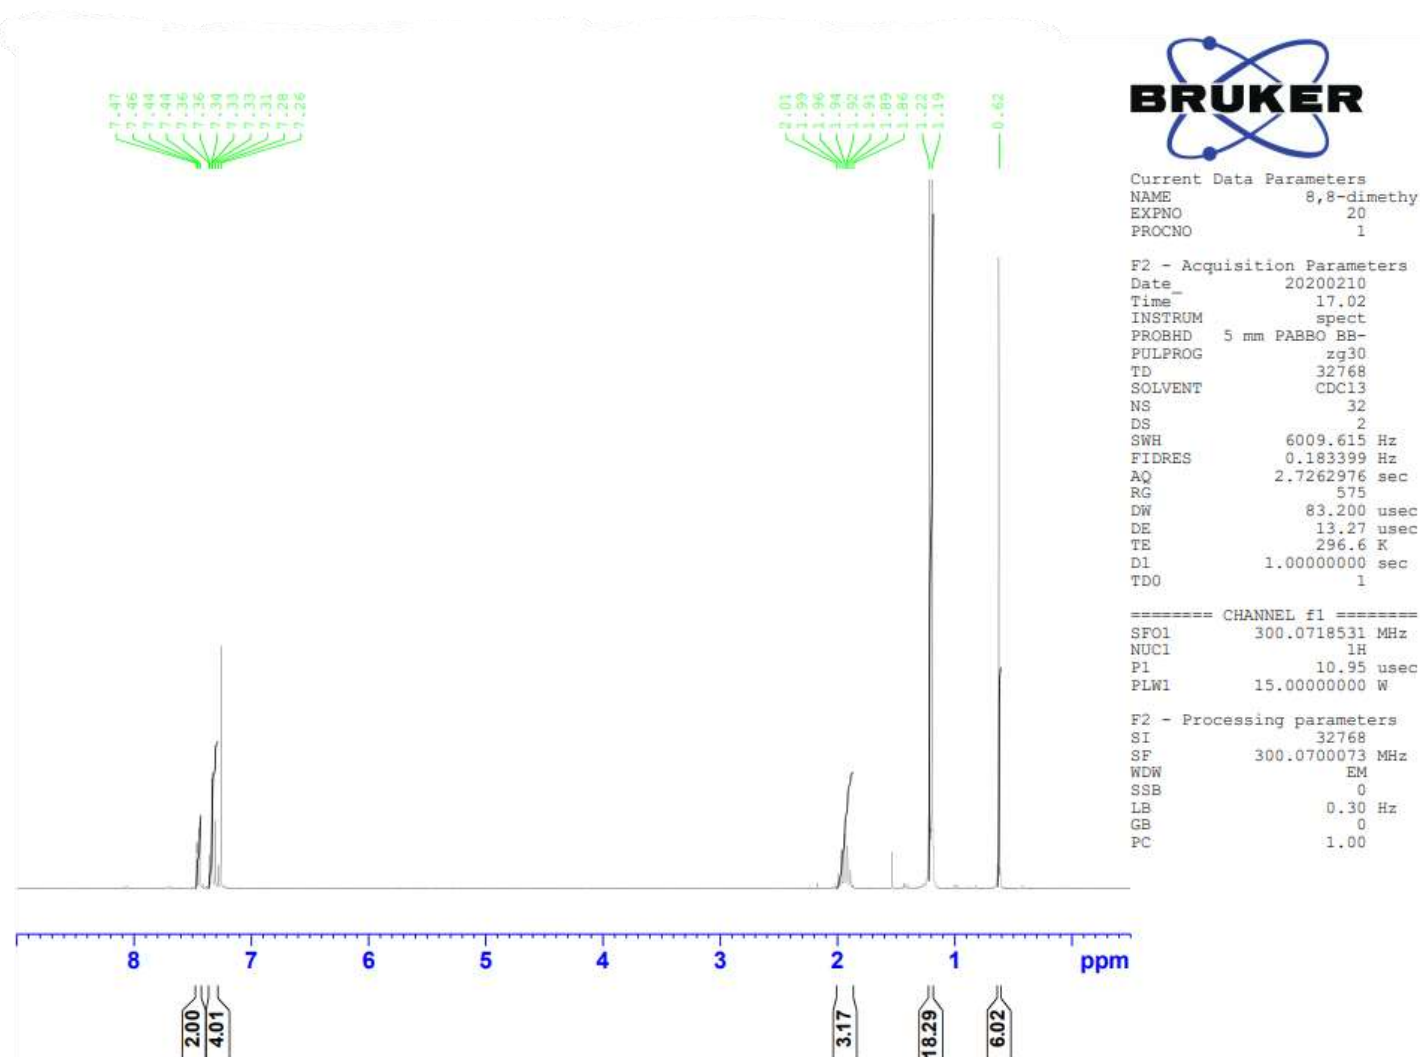

# 8,8-Dimethyl-4-(triisopropylsilyl)-4,8-dihydrosilolo[2,3,4,5-def]carbazole [8a]

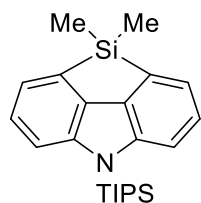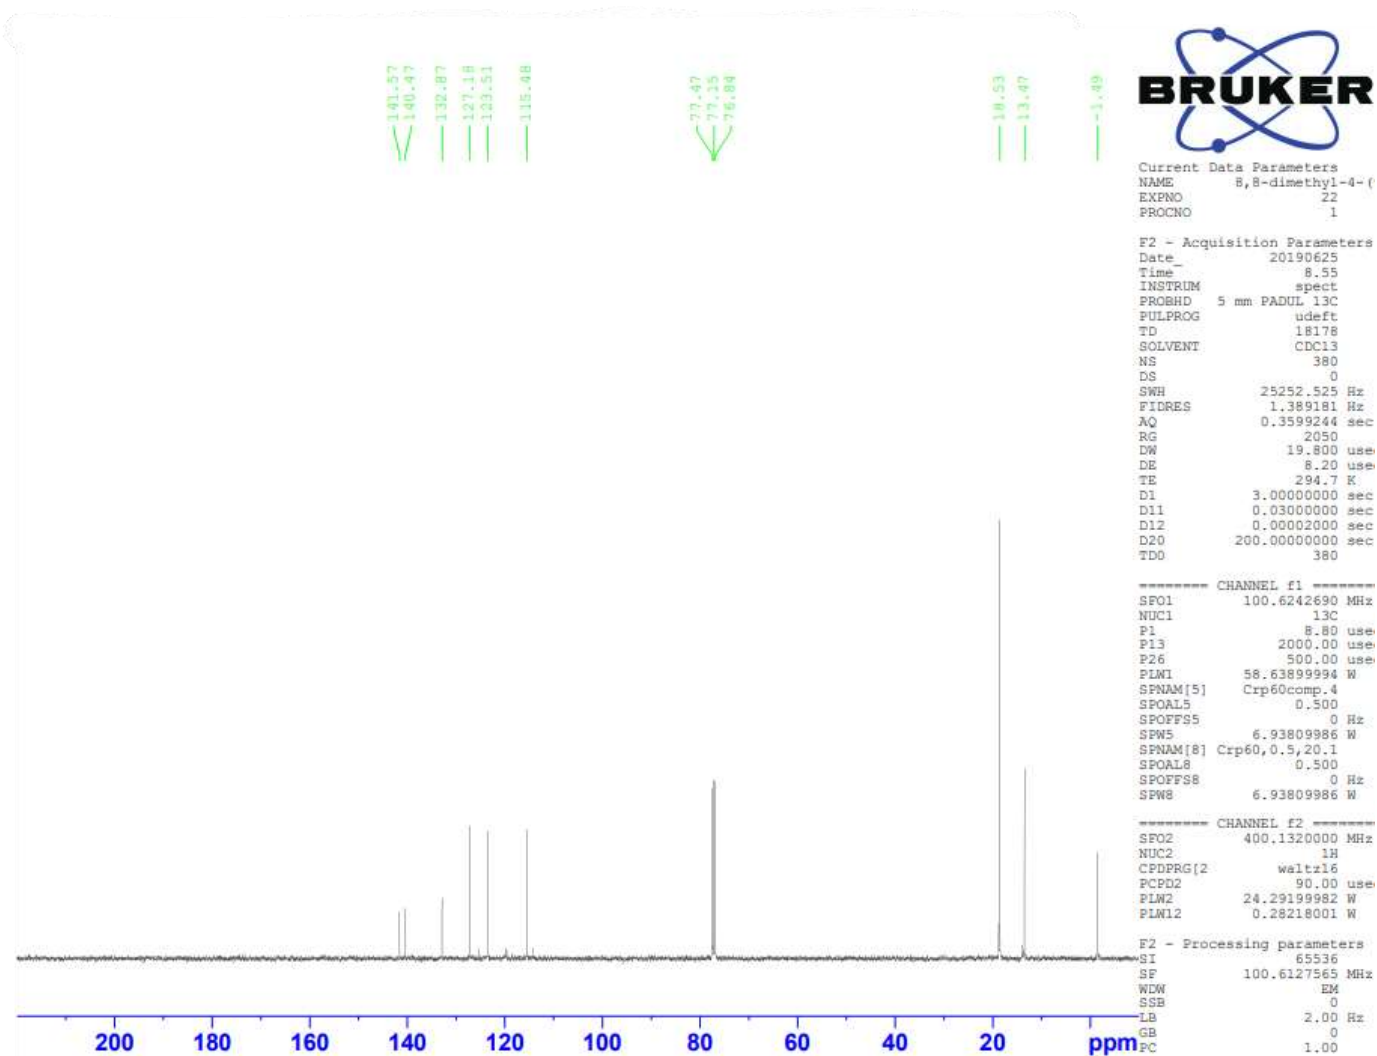

# 8,8-Dimethyl-4-(triisopropylsilyl)-4,8-dihydrogermolo[2,3,4,5-def]carbazole [9a]

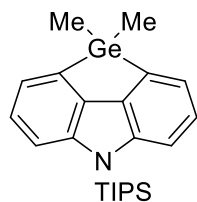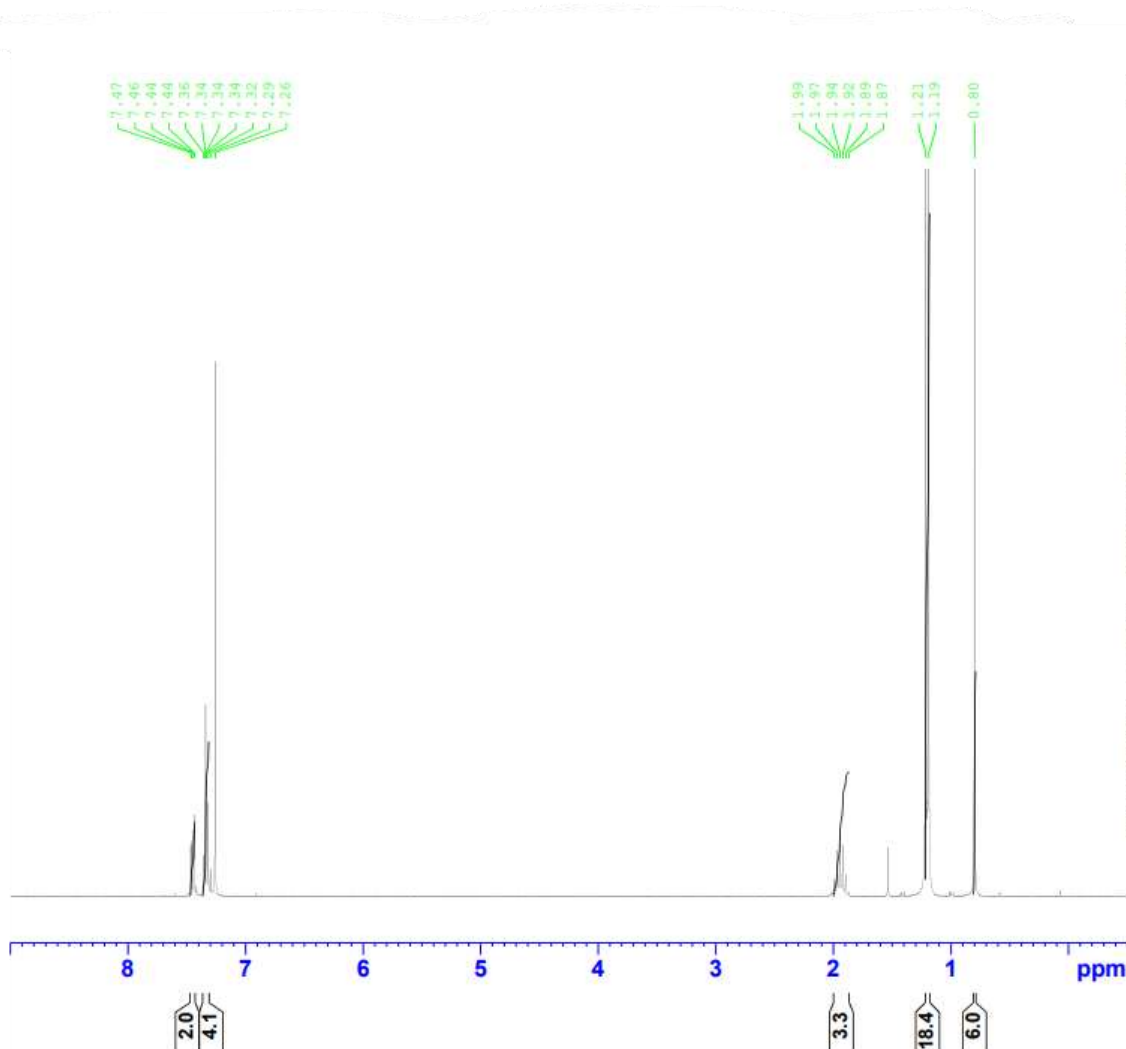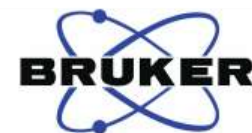

Current Data Parameters  
NAME 8,8-dimethyl  
EXPNO 30  
PROCNO 1

F2 - Acquisition Parameters  
Date\_ 20200129  
Time 17.07  
INSTRUM spect  
PROBHD 5 mm PABBO BB-  
PULPROG zg30  
TD 32768  
SOLVENT CDCl3  
NS 32  
DS 2  
SWH 6009.615 Hz  
FIDRES 0.183399 Hz  
AQ 2.7262976 sec  
RG 1030  
DW 83.200 usec  
DE 13.27 usec  
TE 296.2 K  
D1 1.00000000 sec  
TD0 1

===== CHANNEL f1 =====  
SFO1 300.0718531 MHz  
NUC1 1H  
P1 10.95 usec  
PLW1 15.00000000 W

F2 - Processing parameters  
SI 32768  
SF 300.0700074 MHz  
WDW EM  
SSB 0  
LB 0.30 Hz  
GB 0  
PC 1.00

# 8,8-Dimethyl-4-(triisopropylsilyl)-4,8-dihydrogermolo[2,3,4,5-def]carbazole [9a]

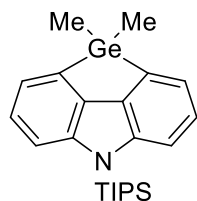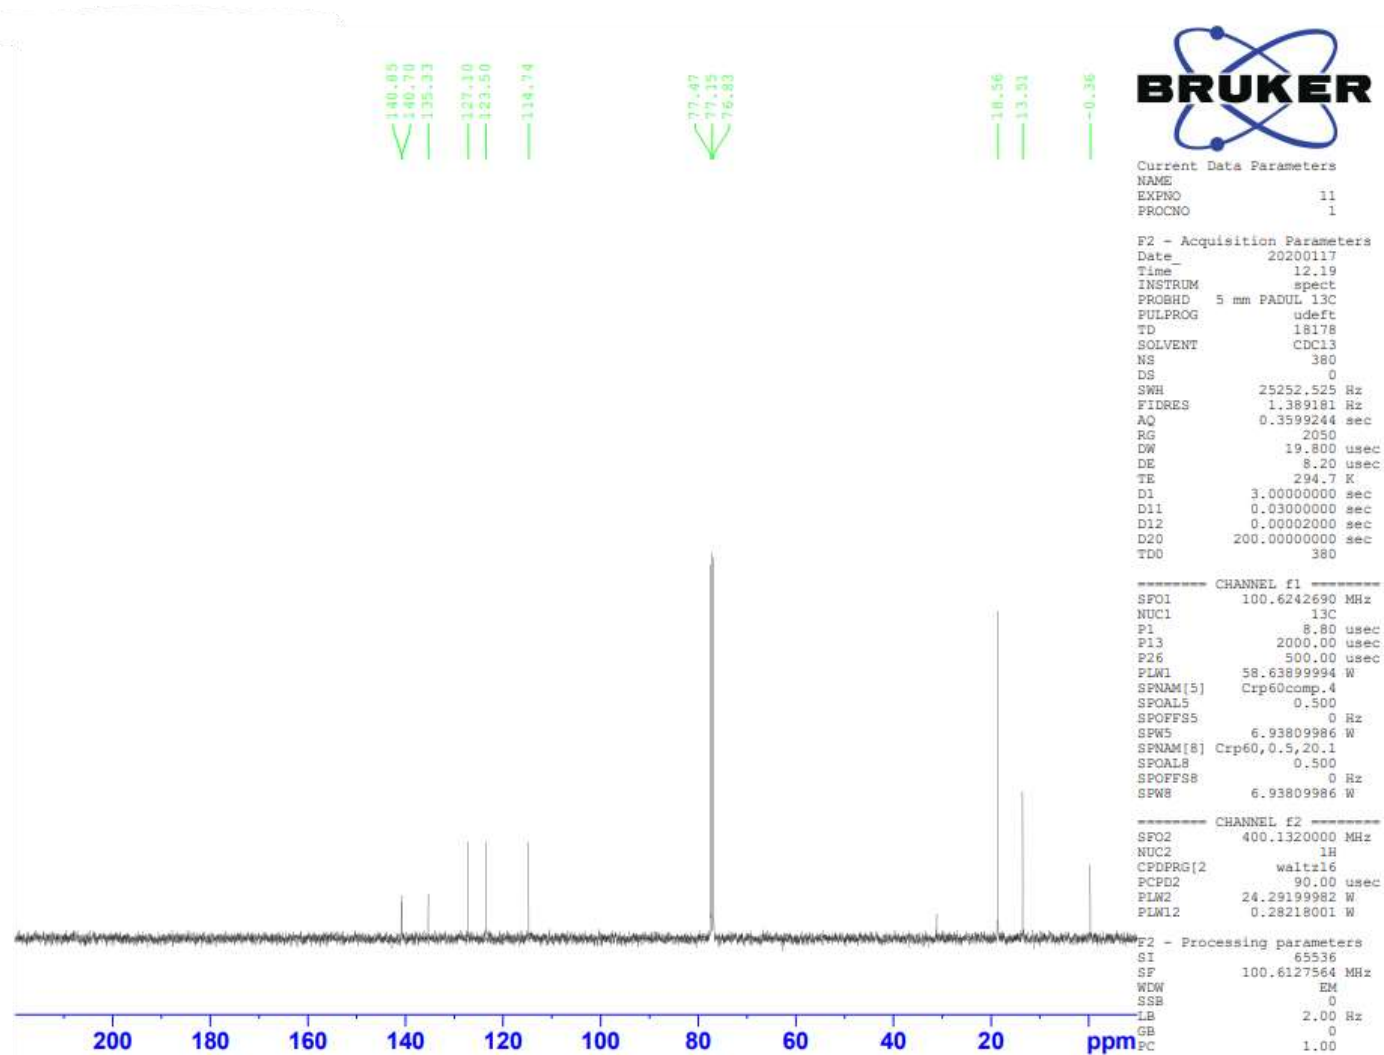

9-(Triisopropylsilyl)-9H-[1,2]dithiino[3,4,5,6-def]carbazole [10a]

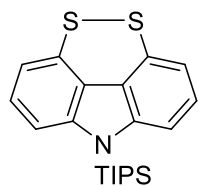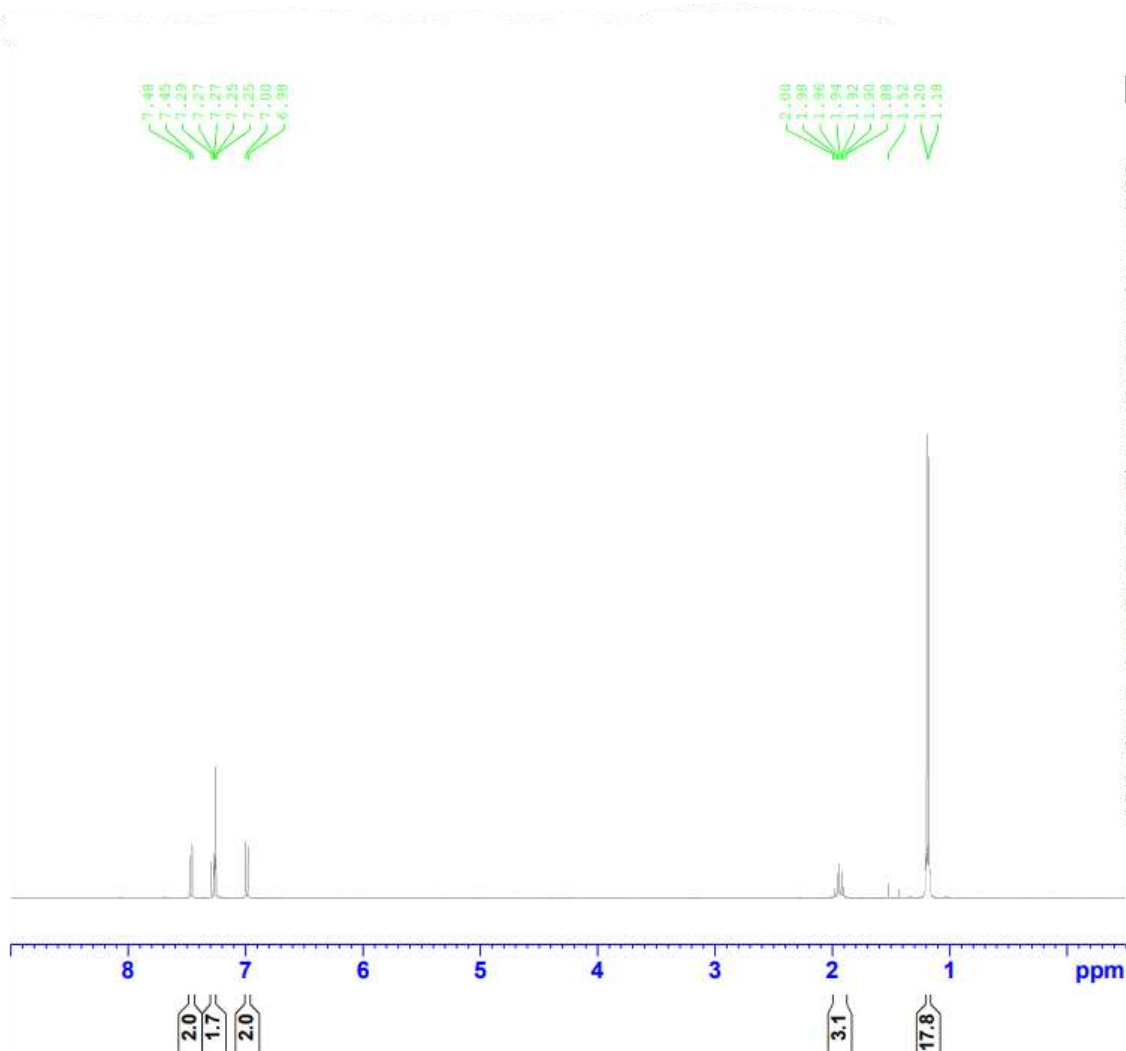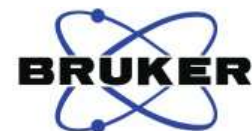

Current Data Parameters  
NAME 9-(triisopropylsi  
EXPNO 10  
PROCNO 1

F2 - Acquisition Parameters  
Date\_ 20210218  
Time\_ 17.19 h  
INSTRUM AvanceNeo  
PROBHD Z116098\_0793 (   
PULPROG zg30  
TD 65536  
SOLVENT CDCl3  
NS 4  
DS 0  
SWH 7142.857 Hz  
FIDRES 0.217983 Hz  
AQ 4.5875201 sec  
RG 101  
DW 70.000 usec  
DE 14.80 usec  
TE 298.0 K  
D1 2.00000000 sec  
TD0 1  
SFO1 400.1324008 MHz  
NUC1 1H  
P0 3.13 usec  
P1 9.40 usec  
PLW1 18.69700050 W

F2 - Processing parameters  
SI 131072  
SF 400.1300123 MHz  
WDW EM  
SSB 0  
LB 0.10 Hz  
GB 0  
PC 1.00

9-(Triisopropylsilyl)-9H-[1,2]dithiino[3,4,5,6-def]carbazole [10a]

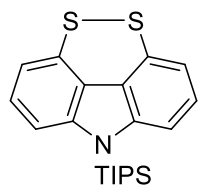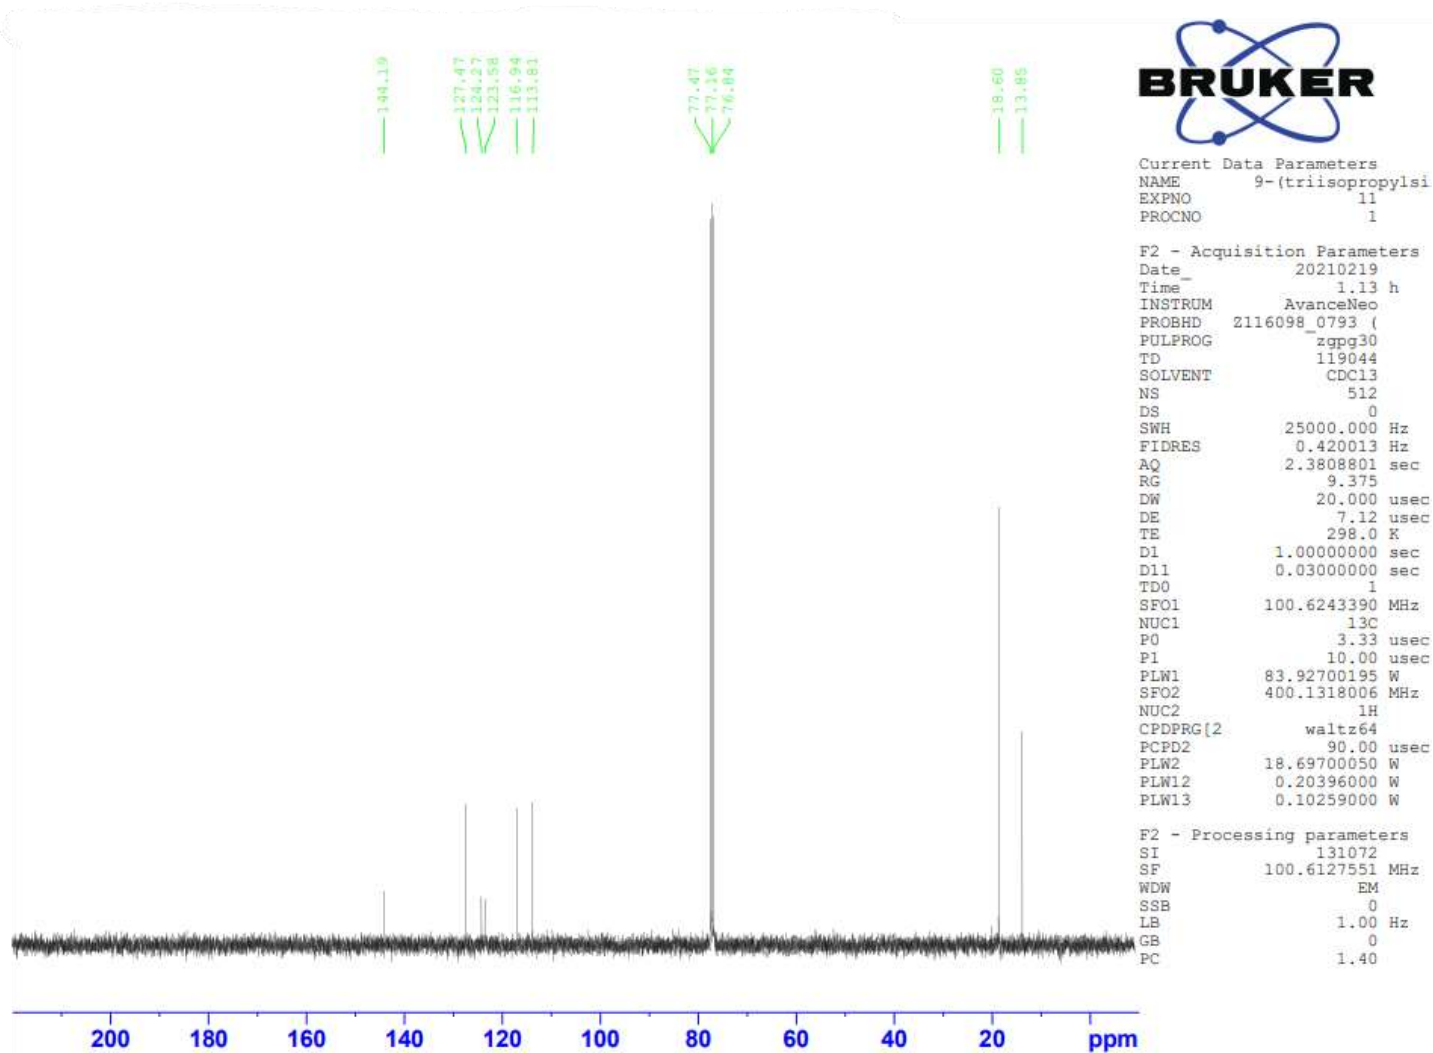

**Mixture of 10a and 11a (1:~2.2 by integration of  $^1\text{H}$  NMR)**

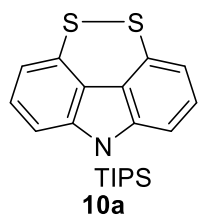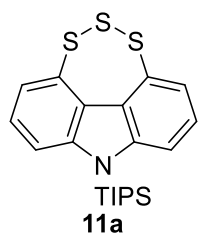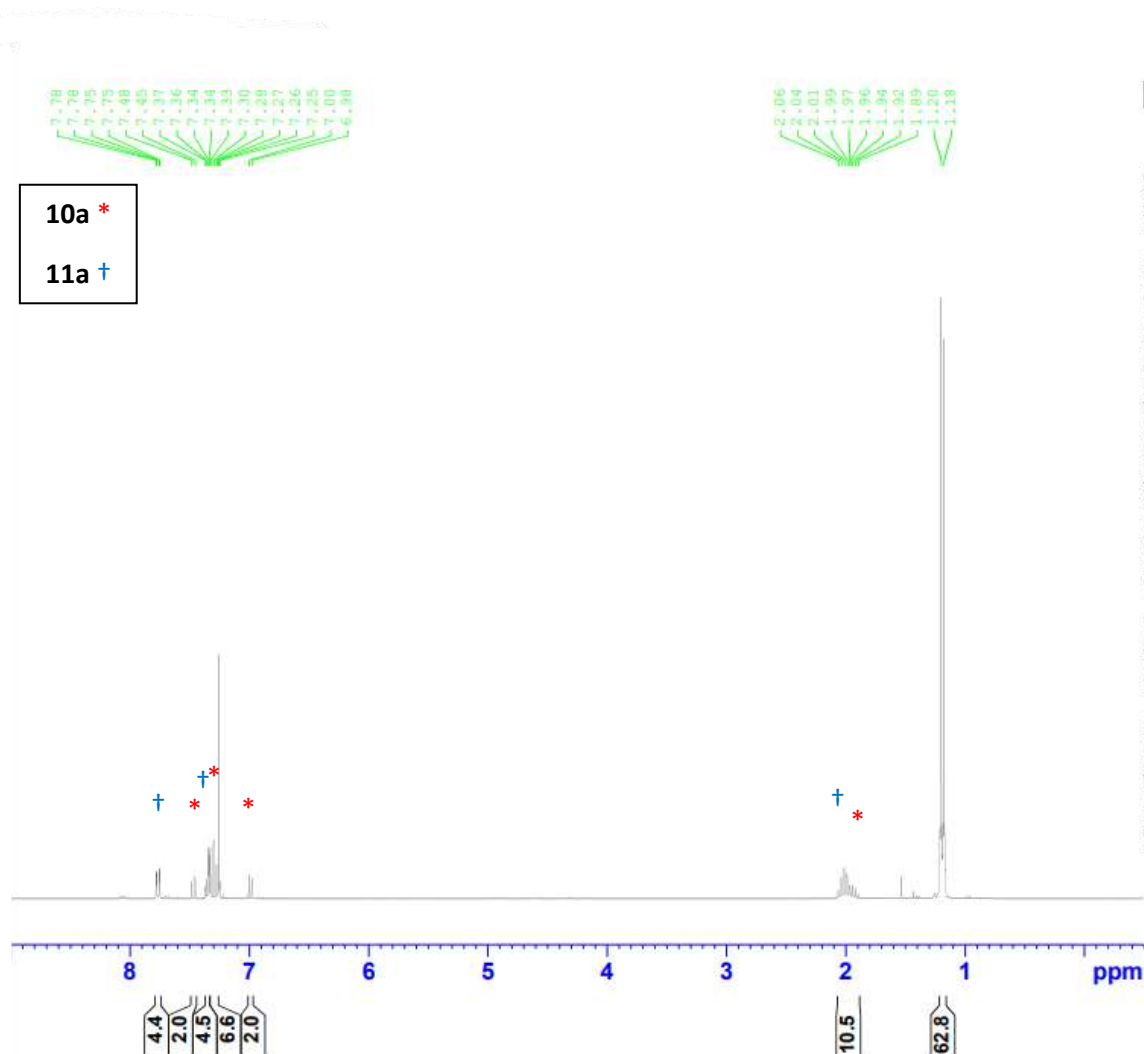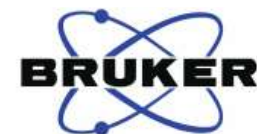

Current Data Parameters  
NAME  
EXPNO 10  
PROCNO 1

F2 - Acquisition Parameters  
Date\_ 20201217  
Time\_ 10.02  
INSTRUM spect  
PROBHD 5 mm QNP 1H/13  
PULPROG zg30  
TD 32768  
SOLVENT CDC13  
NS 32  
DS 2  
SWH 6009.615 Hz  
FIDRES 0.183399 Hz  
AQ 2.7262976 sec  
RG 645  
DW 83.200 usec  
DE 13.05 usec  
TE 295.6 K  
D1 1.00000000 sec  
TD0 1

===== CHANNEL f1 =====  
SFO1 300.0718531 MHz  
NUC1 1H  
P1 12.00 usec  
PLW1 9.50000000 W

F2 - Processing parameters  
SI 32768  
SF 300.0700083 MHz  
WDW EM  
SSB 0  
LB 0.30 Hz  
GB 0  
PC 1.00

# Low resolution mass spectrum of mixture of 10a and 11a

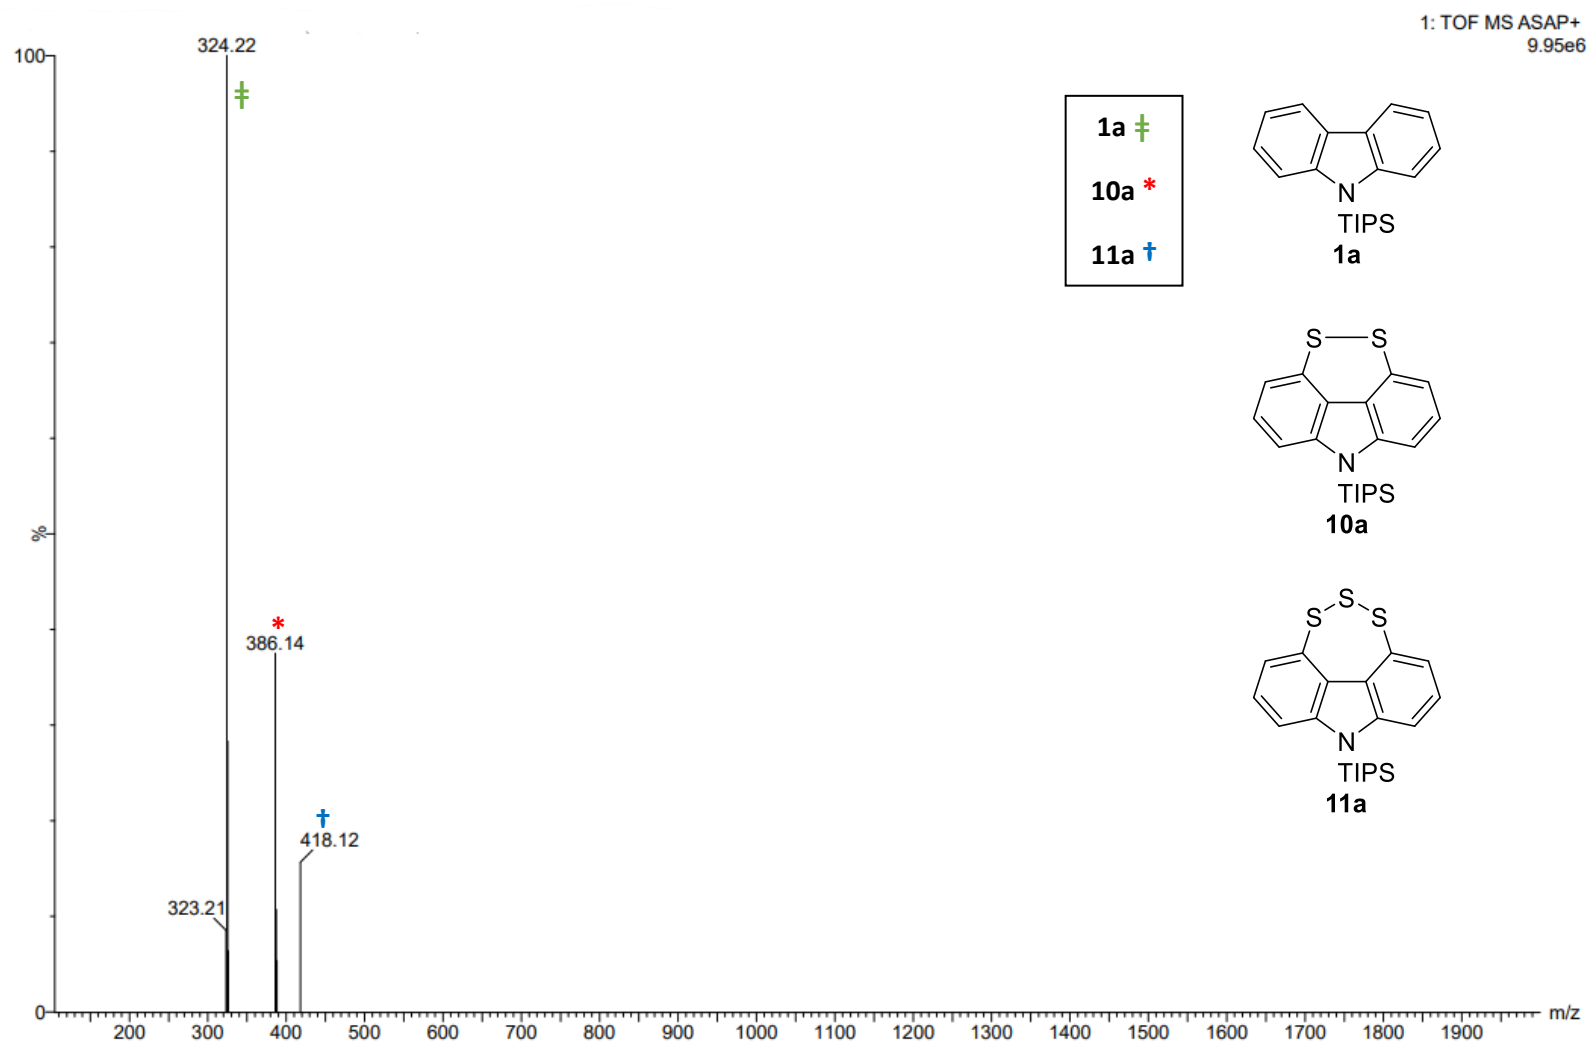

9-(Triisopropylsilyl)-9H-[1,2]dithiino[3,4,5,6-def]carbazole [10b]

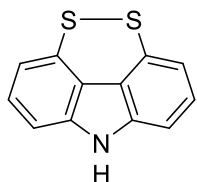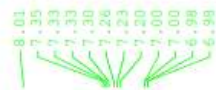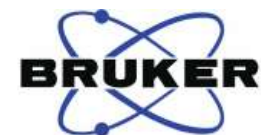

Current Data Parameters  
NAME  
EXPNO 20  
PROCNO 1

F2 - Acquisition Parameters  
Date\_ 20210429  
Time 16.26  
INSTRUM spect  
PROBHD 5 mm QNP 1H/13  
PULPROG zg30  
TD 32768  
SOLVENT CDC13  
NS 32  
DS 2  
SWH 6009.615 Hz  
FIDRES 0.183399 Hz  
AQ 2.7262976 sec  
RG 645  
DW 83.200 usec  
DE 13.05 usec  
TE 295.1 K  
D1 1.00000000 sec  
TDO 1

===== CHANNEL f1 =====  
SF01 300.0718531 MHz  
NUC1 1H  
P1 12.00 usec  
PLW1 9.50000000 W

F2 - Processing parameters  
SI 32768  
SF 300.0700073 MHz  
WDW EM  
SSB 0  
LB 0.30 Hz  
GB 0  
PC 1.00

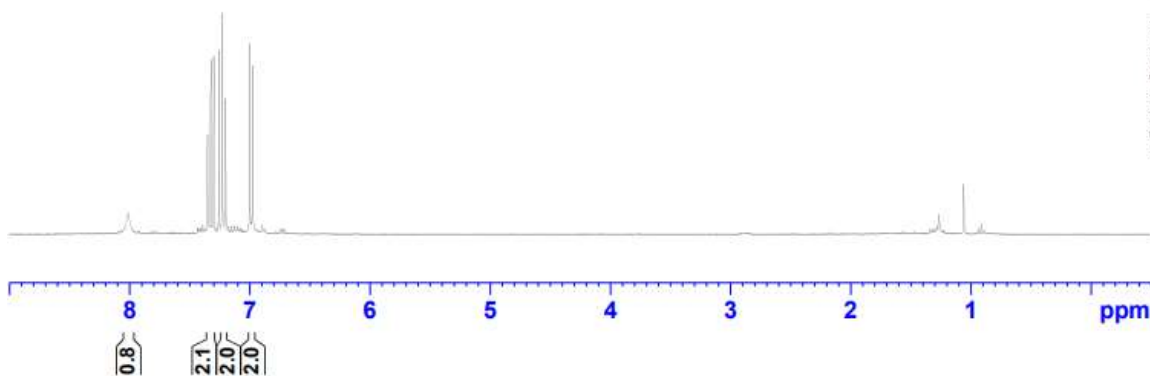

# 9-(Triisopropylsilyl)-9H-[1,2]dithiino[3,4,5,6-def]carbazole [10b]

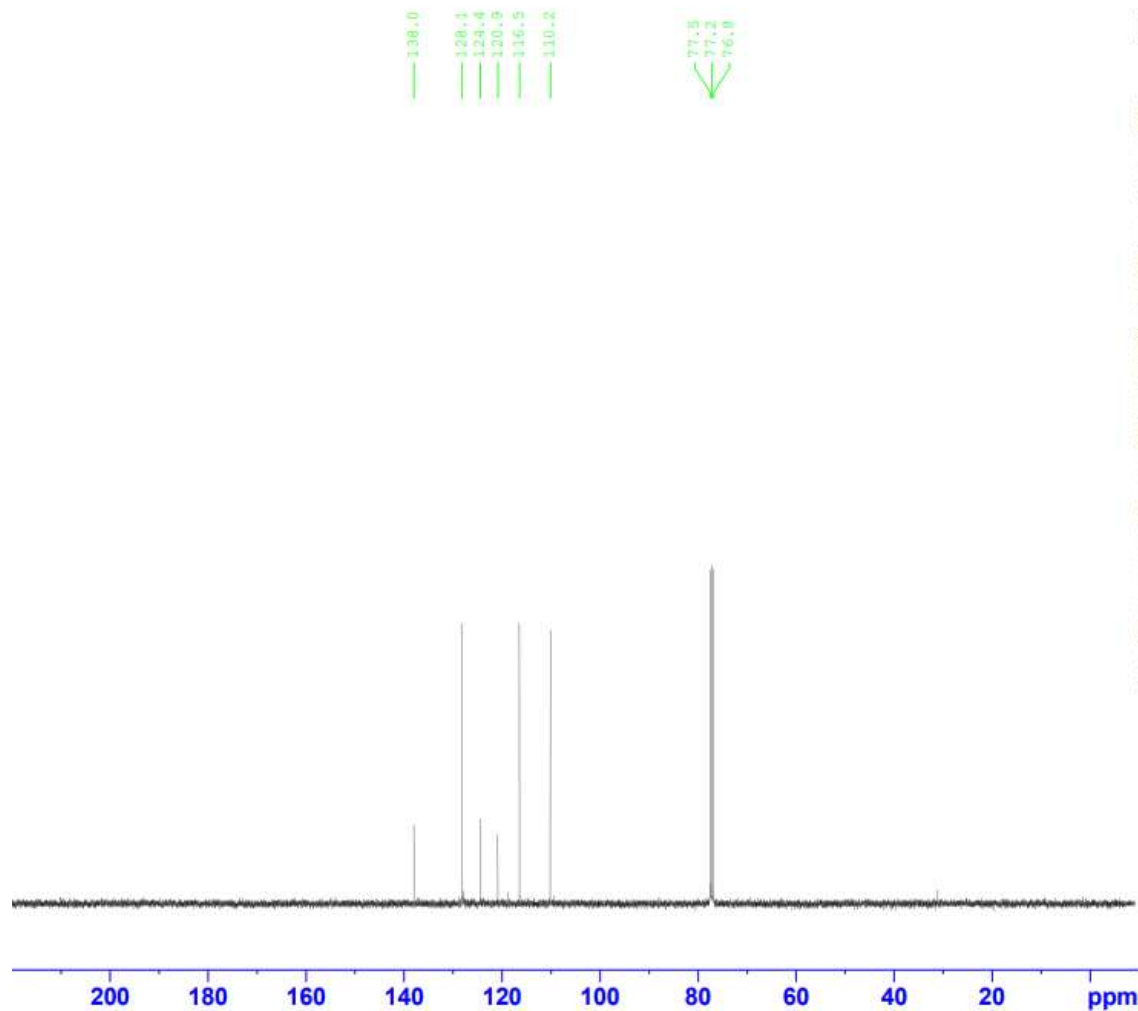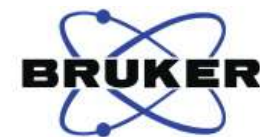

Current Data Parameters

|        |    |
|--------|----|
| NAME   | 10 |
| EXPNO  | 1  |
| PROCNO | 1  |

F2 - Acquisition Parameters

|         |                 |
|---------|-----------------|
| Date_   | 20210501        |
| Time    | 2.52 h          |
| INSTRUM | AvanceNeo       |
| PROBHD  | z116098_0793 1  |
| PULPROG | zgpg30          |
| TD      | 119044          |
| SOLVENT | CDCl3           |
| NS      | 512             |
| DS      | 0               |
| SWH     | 25000.000 Hz    |
| FIDRES  | 0.420013 Hz     |
| AQ      | 2.3809801 sec   |
| RG      | 9.375           |
| DW      | 20.000 usec     |
| DE      | 7.12 usec       |
| TE      | 298.0 K         |
| D1      | 1.00000000 sec  |
| D11     | 0.03000000 sec  |
| TD0     | 1               |
| SFO1    | 100.6243390 MHz |
| NUC1    | 13C             |
| P0      | 3.33 usec       |
| P1      | 10.00 usec      |
| PLW1    | 83.92700195 W   |
| SFO2    | 400.1318006 MHz |
| NUC2    | 1H              |
| CPDPRG2 | waltz64         |
| PCPD2   | 90.00 usec      |
| PLW2    | 18.69700050 W   |
| PLW12   | 0.20396000 W    |
| PLW13   | 0.10259000 W    |

F2 - Processing parameters

|     |                 |
|-----|-----------------|
| SF  | 131072          |
| SF  | 100.6127583 MHz |
| WDW | EM              |
| SSB | 0               |
| LB  | 1.00 Hz         |
| GB  | 0               |
| PC  | 1.40            |

9-(Triisopropylsilyl)-9H-[1,2]diselenino[3,4,5,6-def]carbazole [12a]

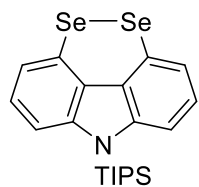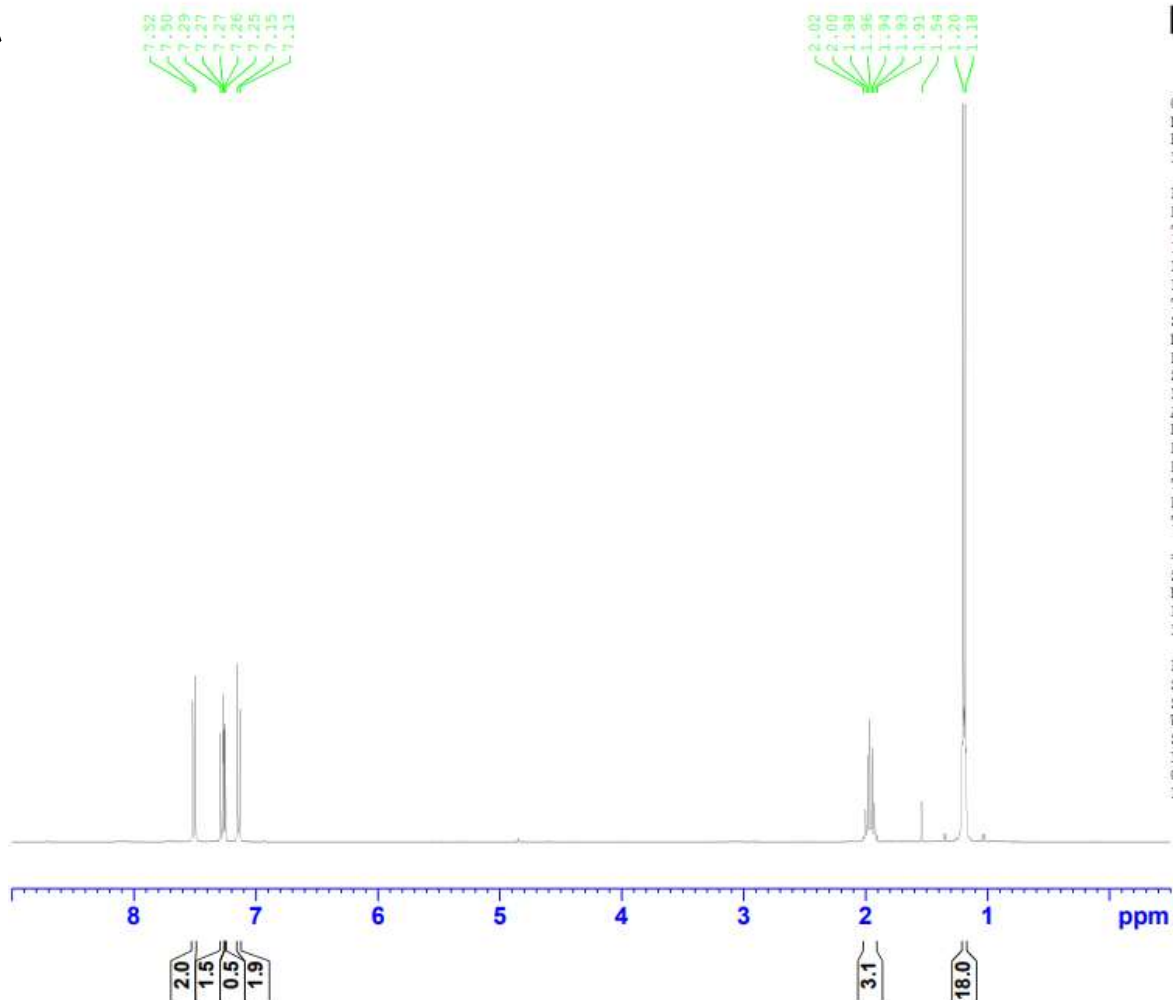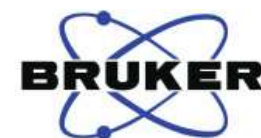

Current Data Parameters

NAME  
EXPNO 10  
PROCNO 1

F2 - Acquisition Parameters

Date\_ 20191109  
Time 5.43  
INSTRUM spect  
PROBHD 5 mm PADUL 13C  
PULPROG zg30  
TD 32768  
SOLVENT CDCl3  
NS 32  
DS 2  
SWH 8223.685 Hz  
FIDRES 0.250967 Hz  
AQ 1.9922944 sec  
RG 203  
DW 60.800 usec  
DE 16.65 usec  
TE 294.8 K  
D1 1.50000000 sec  
TD0 1

===== CHANNEL f1 =====

SFO1 400.1324008 MHz  
NUC1 1H  
P1 11.06 usec  
PLW1 24.29199982 W

F2 - Processing parameters

SI 32768  
SF 400.1300098 MHz  
WDW EM  
SSB 0  
LB 0.30 Hz  
GB 0  
PC 1.00

9-(Triisopropylsilyl)-9H-[1,2]diselenino[3,4,5,6-def]carbazole [12a]

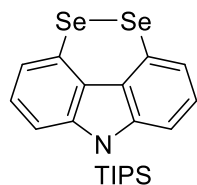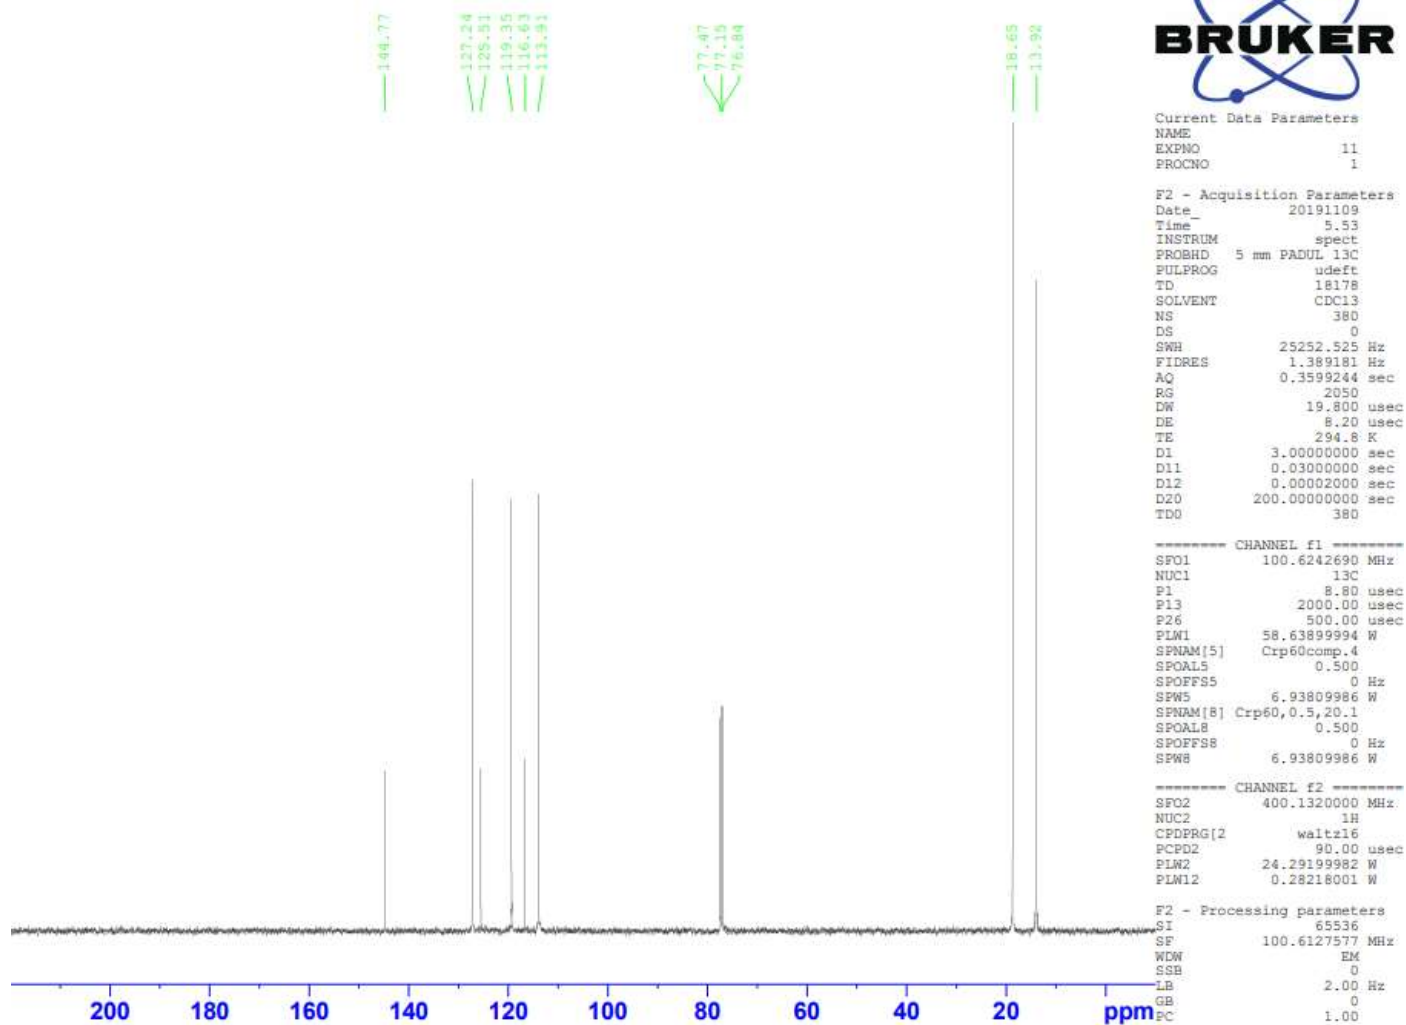

9-(Triisopropylsilyl)-9H-[1,2]diselenino[3,4,5,6-def]carbazole [12a]

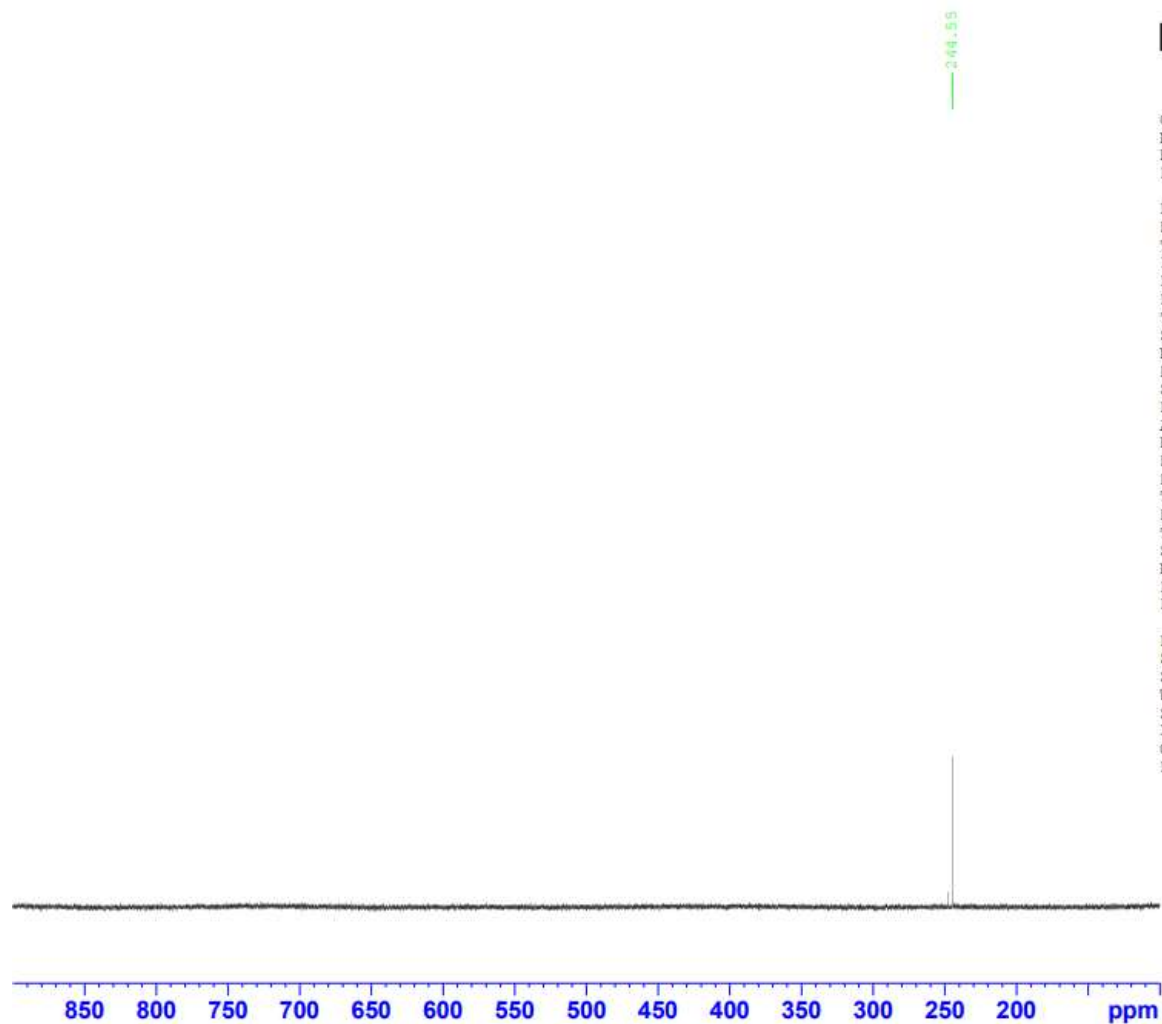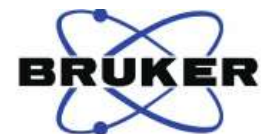

Current Data Parameters

NAME  
EXPNO 12  
PROCNO 1

F2 - Acquisition Parameters

Date\_ 20190317  
Time\_ 7.53 h  
INSTRUM AvanceNeo, Otter  
PROBHD Z116098\_0793 (   
PULPROG zg  
TD 32768  
SOLVENT CDCl3  
NS 1500  
DS 0  
SWH 62500.000 Hz  
FIDRES 3.814697 Hz  
AQ 0.2621440 sec  
RG 5.20833  
DW 8.000 usec  
DE 6.50 usec  
TE 298.0 K  
D1 0.50000000 sec  
TD0 1  
SFO1 76.3490004 MHz  
NUC1 77Se  
P1 11.00 usec  
PLW1 90.00000000 W

F2 - Processing parameters

SI 65536  
SF 76.3108450 MHz  
WDW EM  
SSB 0  
LB 2.00 Hz  
GB 0  
PC 1.40

9H-[1,2]diselenino[3,4,5,6-def]carbazole [12b]

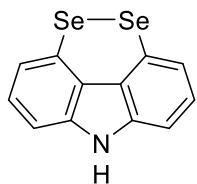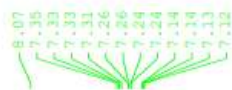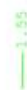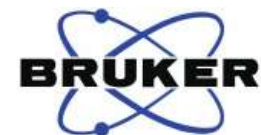

Current Data Parameters  
NAME  
EXPNO 11  
PROCNO 1

F2 - Acquisition Parameters  
Date\_ 20210430  
Time 4.53  
INSTRUM spect  
PROBHD 5 mm PADUL 13C  
PULPROG zg  
TD 32768  
SOLVENT CDCl3  
NS 64  
DS 2  
SWH 8223.685 Hz  
FIDRES 0.250967 Hz  
AQ 1.9922944 sec  
RG 406  
DW 60.800 usec  
DE 11.93 usec  
TE 294.4 K  
D1 15.00000000 sec  
TD0 1

===== CHANNEL f1 =====  
SFO1 400.1324008 MHz  
NUC1 1H  
P1 11.06 usec  
PLW1 24.29199982 W

F2 - Processing parameters  
SI 32768  
SF 400.1300098 MHz  
WDW EM  
SSB 0  
LB 0.30 Hz  
GB 0  
PC 1.00

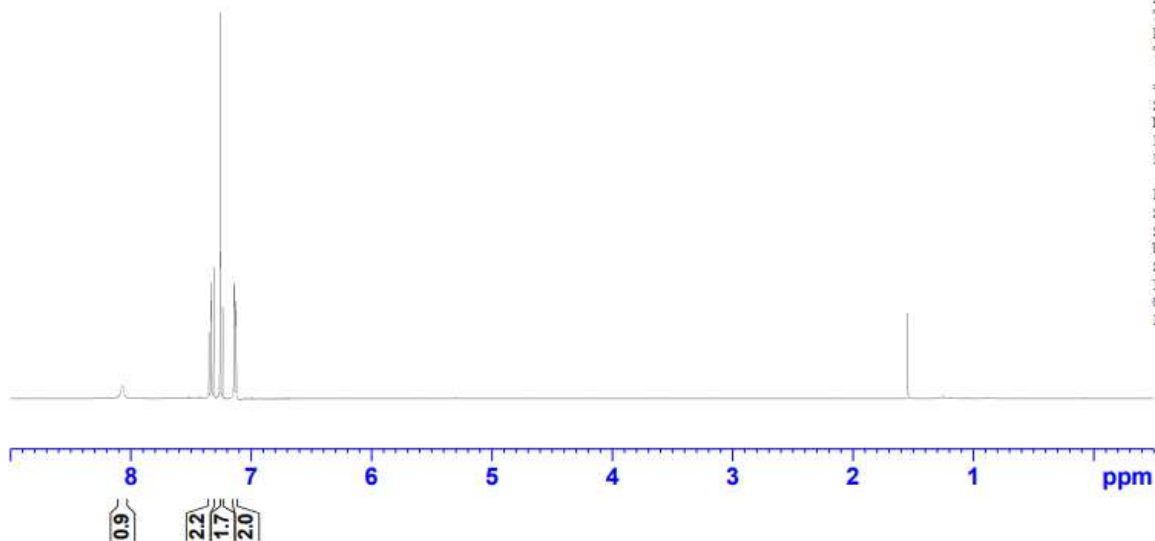

9H-[1,2]diselenino[3,4,5,6-def]carbazole [12b]

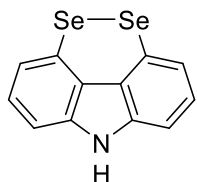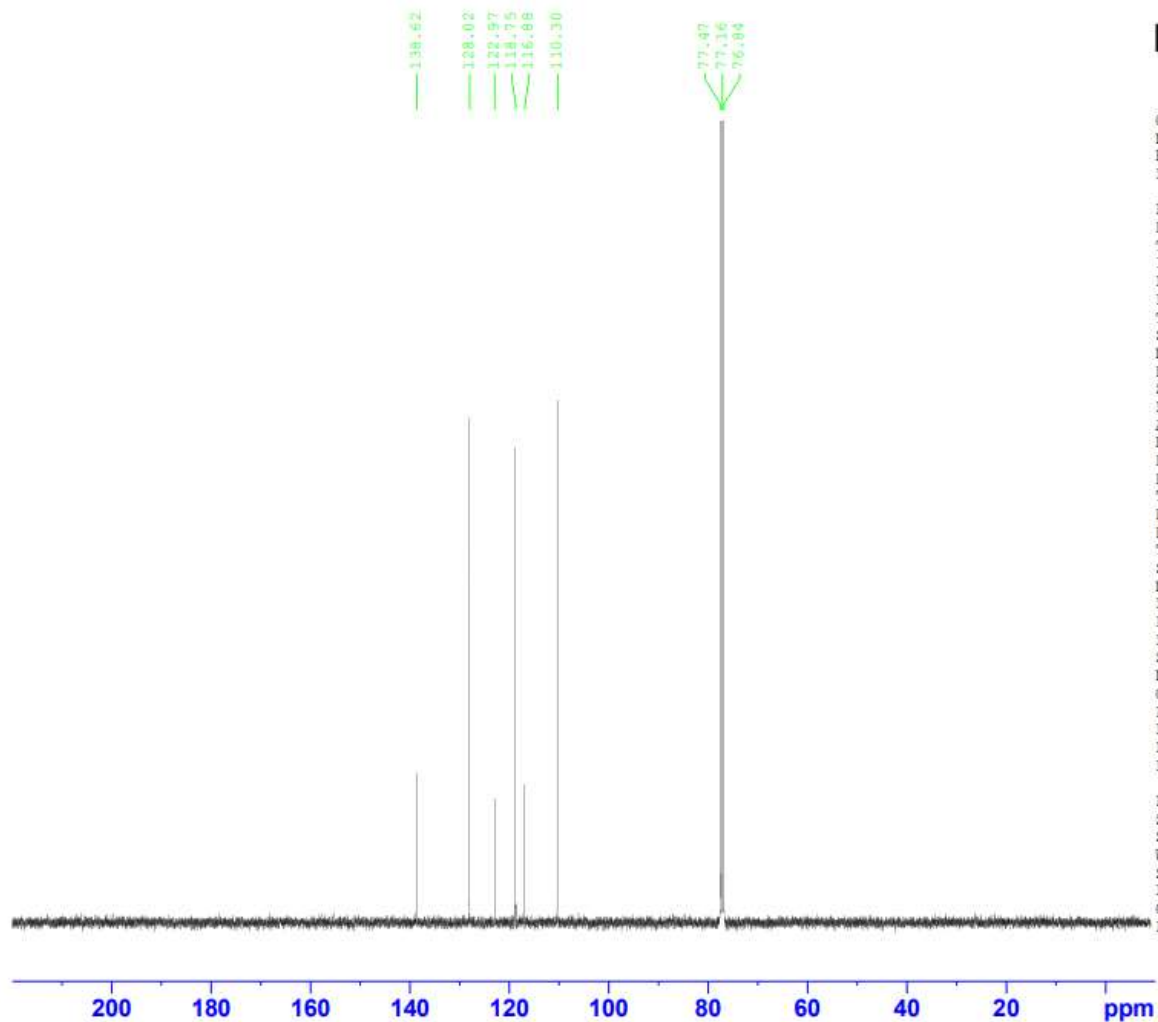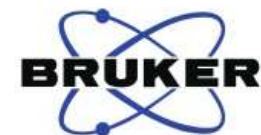

Current Data Parameters

NAME  
EXPNO 11  
PROCNO 1

F2 - Acquisition Parameters

Date\_ 20190317  
Time\_ 8.29 h  
INSTRUM AvanceNeo, Otter  
PROBHD Z116098\_0793 (   
PULPROG zgpg30  
TD 119044  
SOLVENT CDCl3  
NS 512  
DS 0  
SWH 25000.000 Hz  
FIDRES 0.420013 Hz  
AQ 2.3808801 sec  
RG 69.7545  
DW 20.000 usec  
DE 8.29 usec  
TE 298.0 K  
D1 1.00000000 sec  
D11 0.03000000 sec  
TD0 1  
SFO1 100.6243390 MHz  
NUC1 13C  
P0 3.33 usec  
P1 10.00 usec  
PLW1 83.92700195 W  
SFO2 400.1318006 MHz  
NUC2 1H  
CPDPRG[2] waltz64  
PCPD2 90.00 usec  
PLW2 18.69700050 W  
PLW12 0.23083000 W  
PLW13 0.11611000 W

F2 - Processing parameters

SI 131072  
SF 100.6127570 MHz  
WDW EM  
SSB 0  
LB 1.00 Hz  
GB 0  
PC 1.40

9H-[1,2]diselenino[3,4,5,6-def]carbazole [12b]

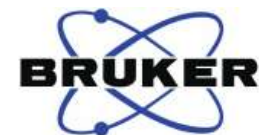

Current Data Parameters

NAME  
EXPNO 12  
PROCNO 1

F2 - Acquisition Parameters

Date\_ 20190317  
Time\_ 8.50 h  
INSTRUM AvanceNeo, Otter  
PROBHD Z116098\_0793 (   
PULPROG zg  
TD 32768  
SOLVENT CDCl3  
NS 1500  
DS 0  
SWH 62500.000 Hz  
FIDRES 3.814697 Hz  
AQ 0.2621440 sec  
RG 7.8125  
DW 8.000 usec  
DE 6.50 usec  
TE 298.0 K  
D1 0.50000000 sec  
TD0 1  
SFO1 76.3490004 MHz  
NUC1 77Se  
P1 11.00 usec  
PLW1 90.00000000 W

F2 - Processing parameters

SI 65536  
SF 76.3108450 MHz  
WDW EM  
SSB 0  
LB 2.00 Hz  
GB 0  
PC 1.40

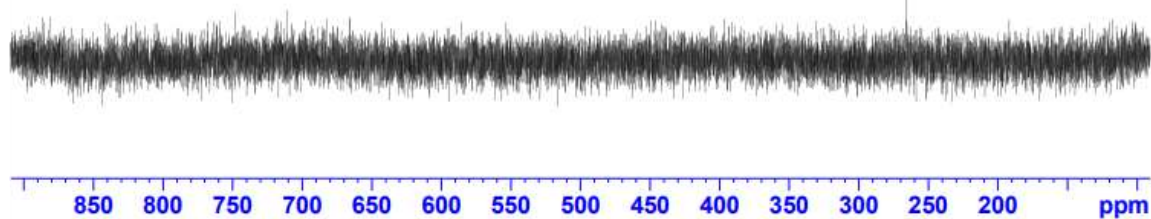

**1,7-Diiodo-8,8-dimethyl-4-(triisopropylsilyl)-4,8-dihydrosilolo[2,3,4,5-def]carbazole [13a]**

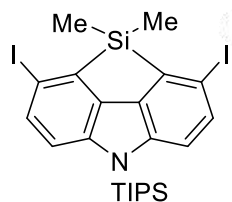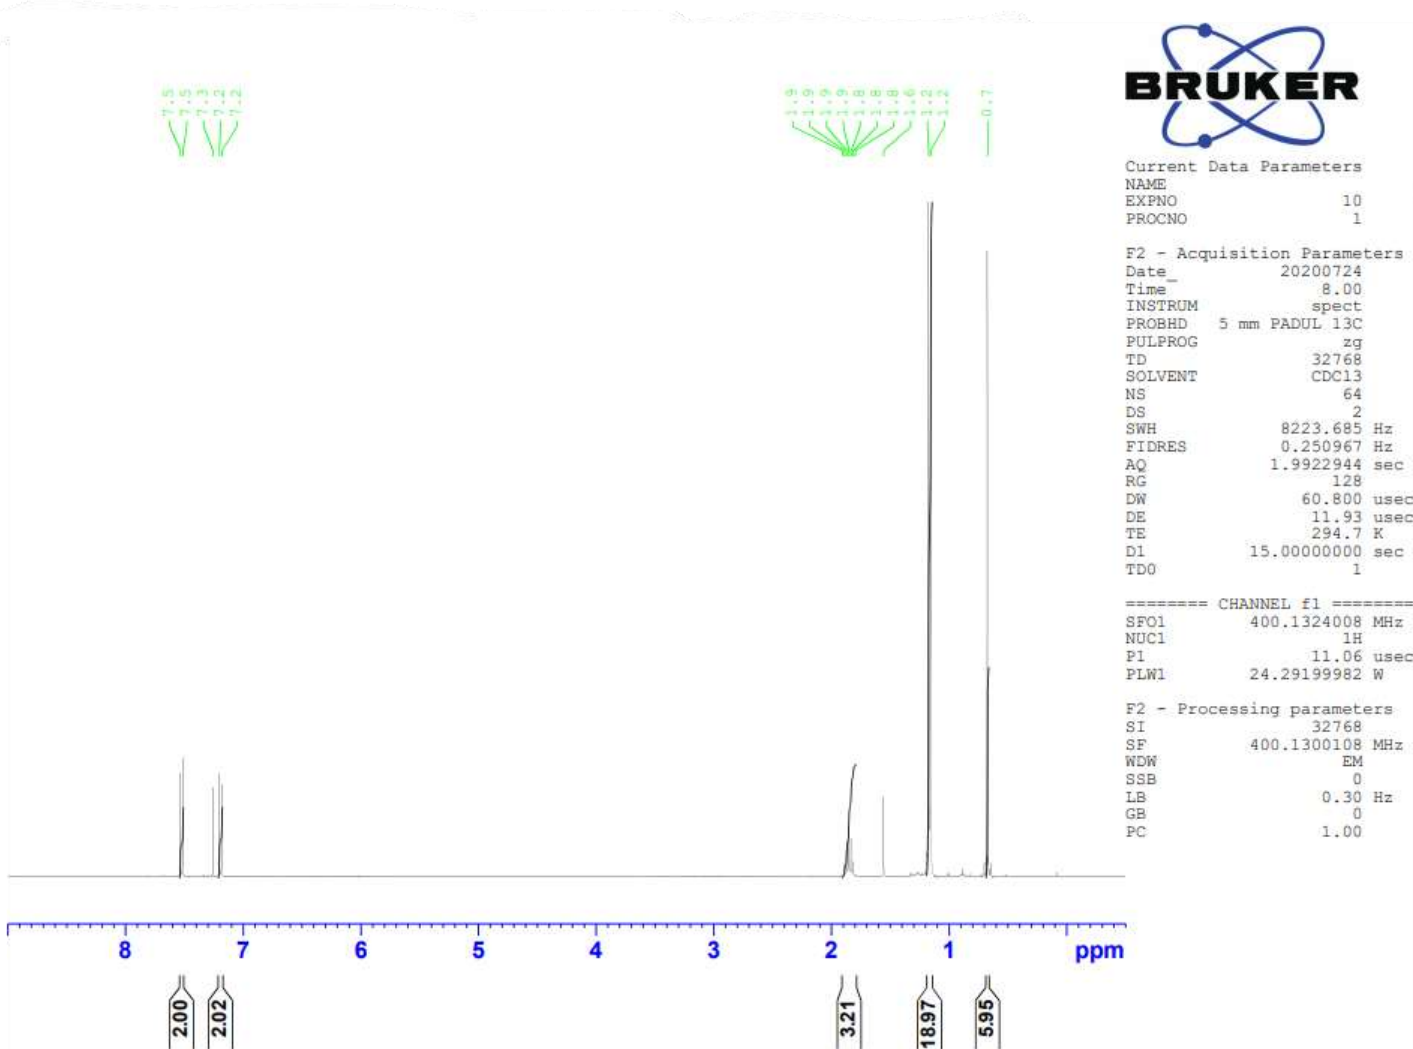

**1,7-Diiodo-8,8-dimethyl-4-(triisopropylsilyl)-4,8-dihydrosilolo[2,3,4,5-def]carbazole [13a]**

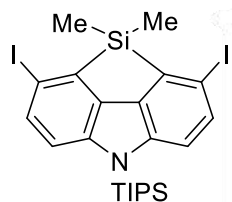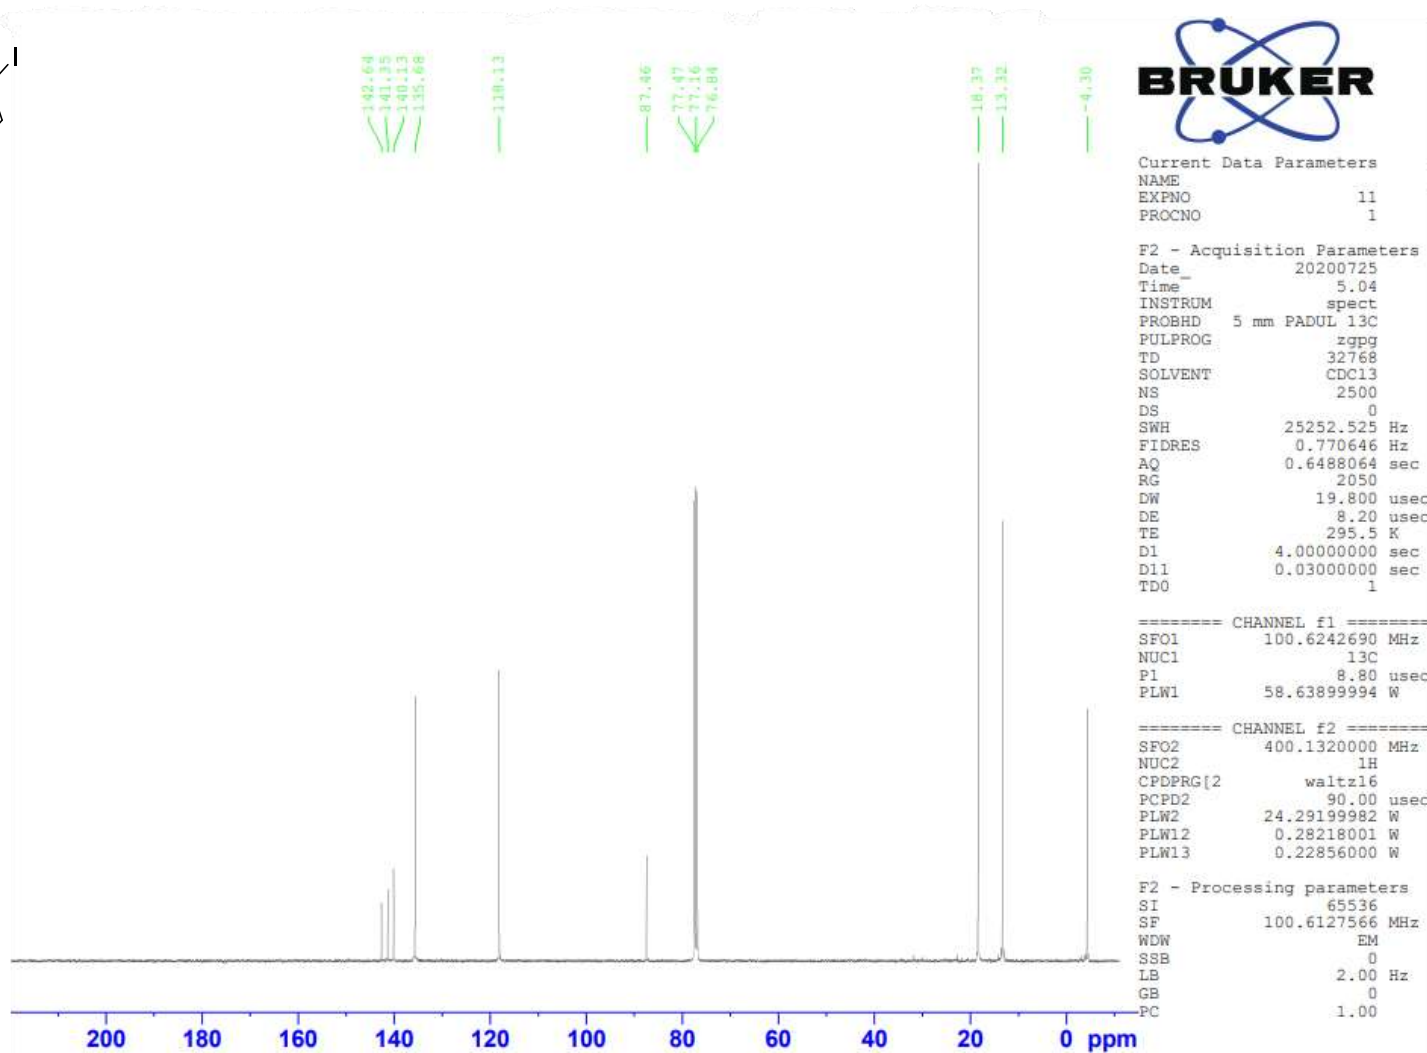

**1,7-Dibromo-8,8-dimethyl-4-(triisopropylsilyl)-4,8-dihydrosilolo[2,3,4,5-def]carbazole [14a]**

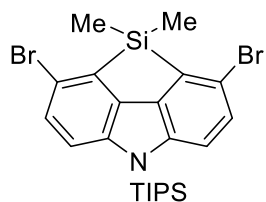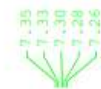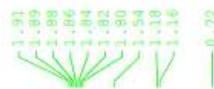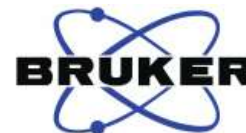

Current Data Parameters

NAME  
EXPNO 11  
PROCNO 1

F2 - Acquisition Parameters

Date\_ 20210429  
Time 17.54  
INSTRUM spect  
PROBHD 5 mm PADUL 13C  
PULPROG zg30  
TD 32768  
SOLVENT CDCl3  
NS 32  
DS 2  
SWH 8223.685 Hz  
FIDRES 0.250967 Hz  
AQ 1.9922944 sec  
RG 812  
DW 60.800 usec  
DE 16.65 usec  
TE 294.7 K  
D1 1.50000000 sec  
TD0 1

----- CHANNEL f1 -----

SFO1 400.1324008 MHz  
NUC1 1H  
P1 11.06 usec  
PLW1 24.29199982 W

F2 - Processing parameters

SI 32768  
SF 400.1300099 MHz  
WDW EM  
SSB 0  
LB 0.30 Hz  
GB 0  
PC 1.00

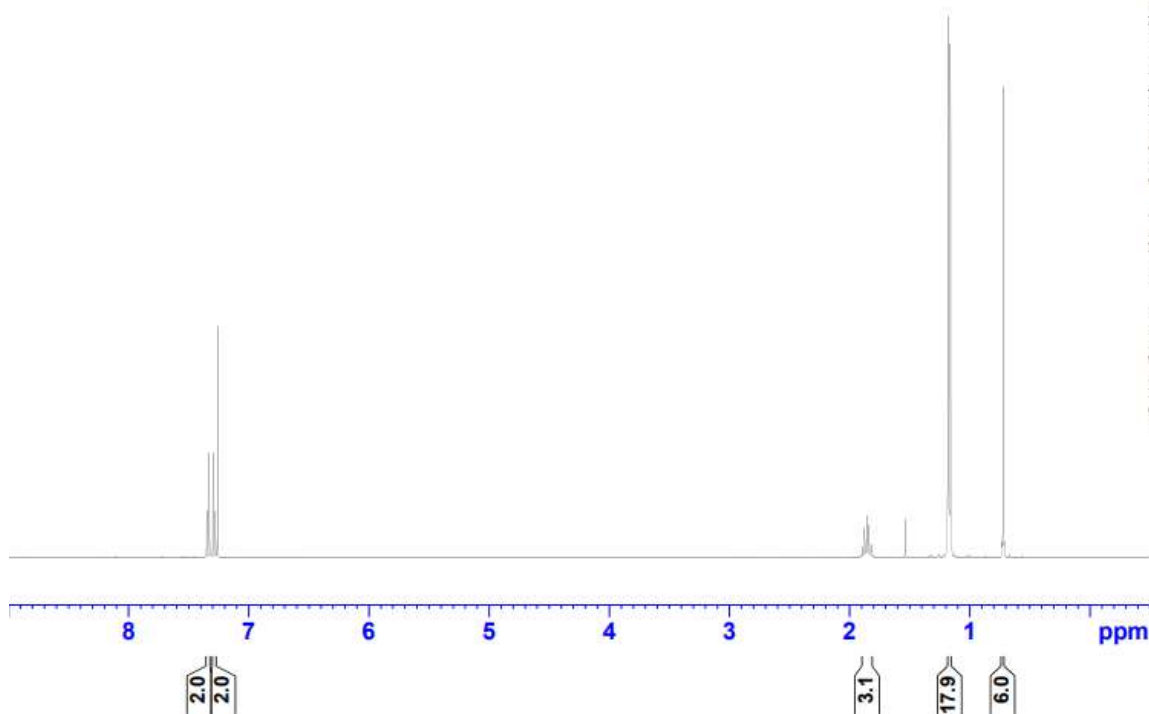

**1,7-Dibromo-8,8-dimethyl-4-(triisopropylsilyl)-4,8-dihydrosilolo[2,3,4,5-def]carbazole [14a]**

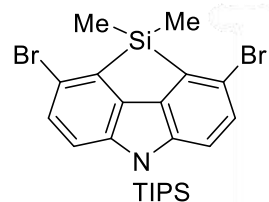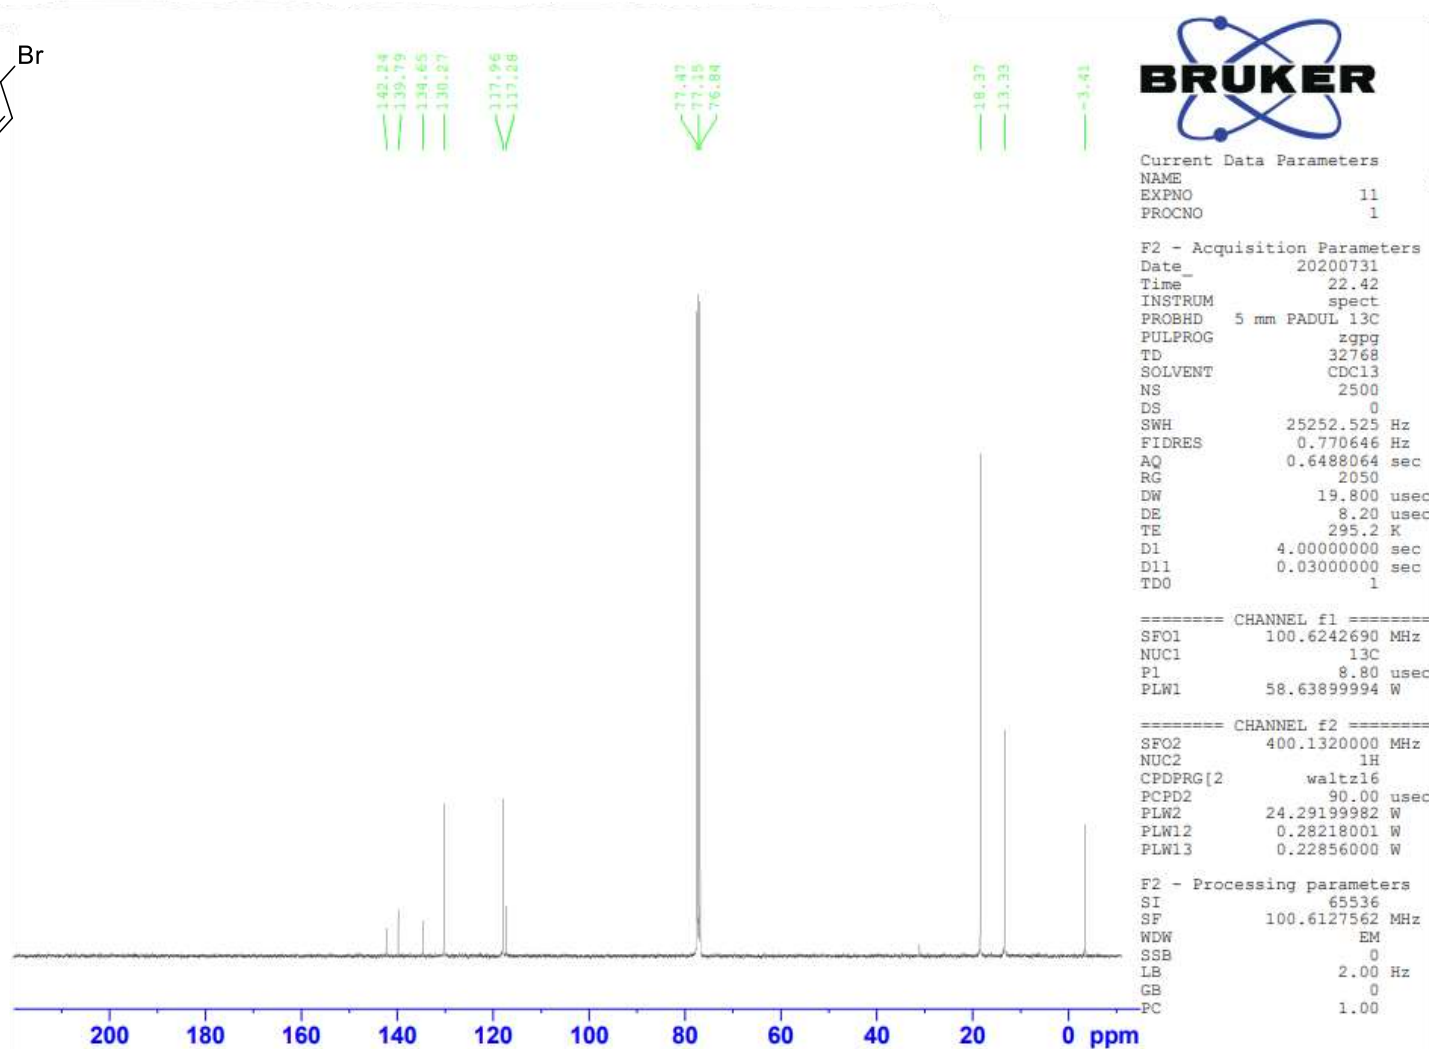

**1,7-Dichloro-8,8-dimethyl-4-(triisopropylsilyl)-4,8-dihydrosilolo[2,3,4,5-def]carbazole [15a]**

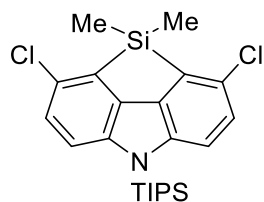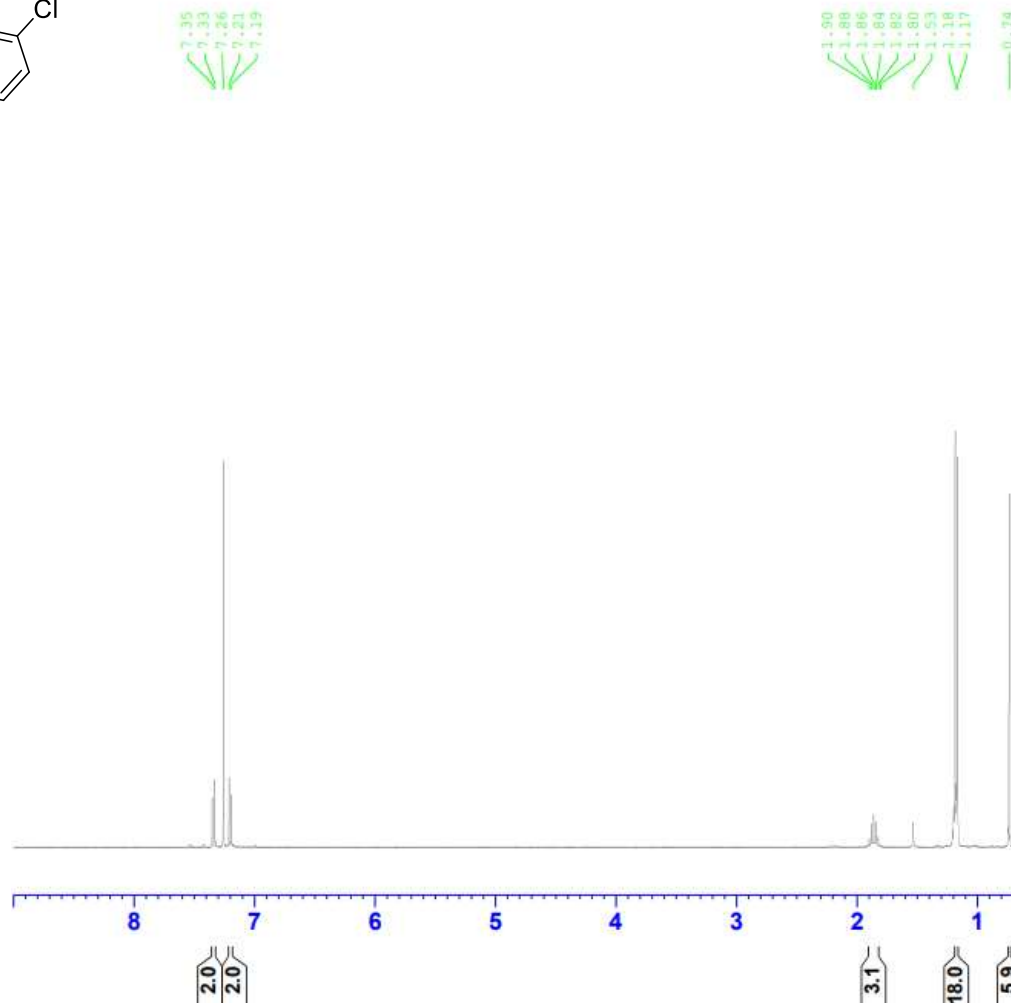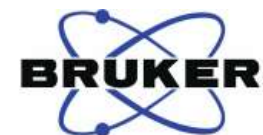

Current Data Parameters

NAME  
EXFNO 14  
PROCNO 1

F2 - Acquisition Parameters

Date 20210326  
Time 3.19 h  
INSTRUM AvanceNeo  
PROBHD Z116098\_0793 (   
PULPROG zg30  
TD 65536  
SOLVENT CDCl3  
NS 4  
DS 0  
SWH 7142.857 Hz  
FIDRES 0.217983 Hz  
AQ 4.5875201 sec  
RG 101  
DW 70.000 usec  
DE 14.80 usec  
TE 298.0 K  
D1 2.00000000 sec  
TD0 1  
SF01 400.1324008 MHz  
NUC1 1H  
P0 3.13 usec  
P1 9.40 usec  
PLW1 18.69700050 W

F1 - Acquisition parameters

TD 256  
SF01 100.6228 MHz  
FIDRES 174.386154 Hz  
SW 221.833 ppm  
FnMODE QF

F2 - Processing parameters

SI 131072  
SF 400.1300099 MHz  
WDW EM  
SSB 0  
LB 0.10 Hz  
GB 0  
PC 1.00

F1 - Processing parameters

SI 512  
MC2 QF  
SF 100.6127690 MHz  
WDW QSINE  
SSB 2  
LB 0 Hz  
GB 0

**1,7-Dichloro-8,8-dimethyl-4-(triisopropylsilyl)-4,8-dihydrosilolo[2,3,4,5-def]carbazole [15a]**

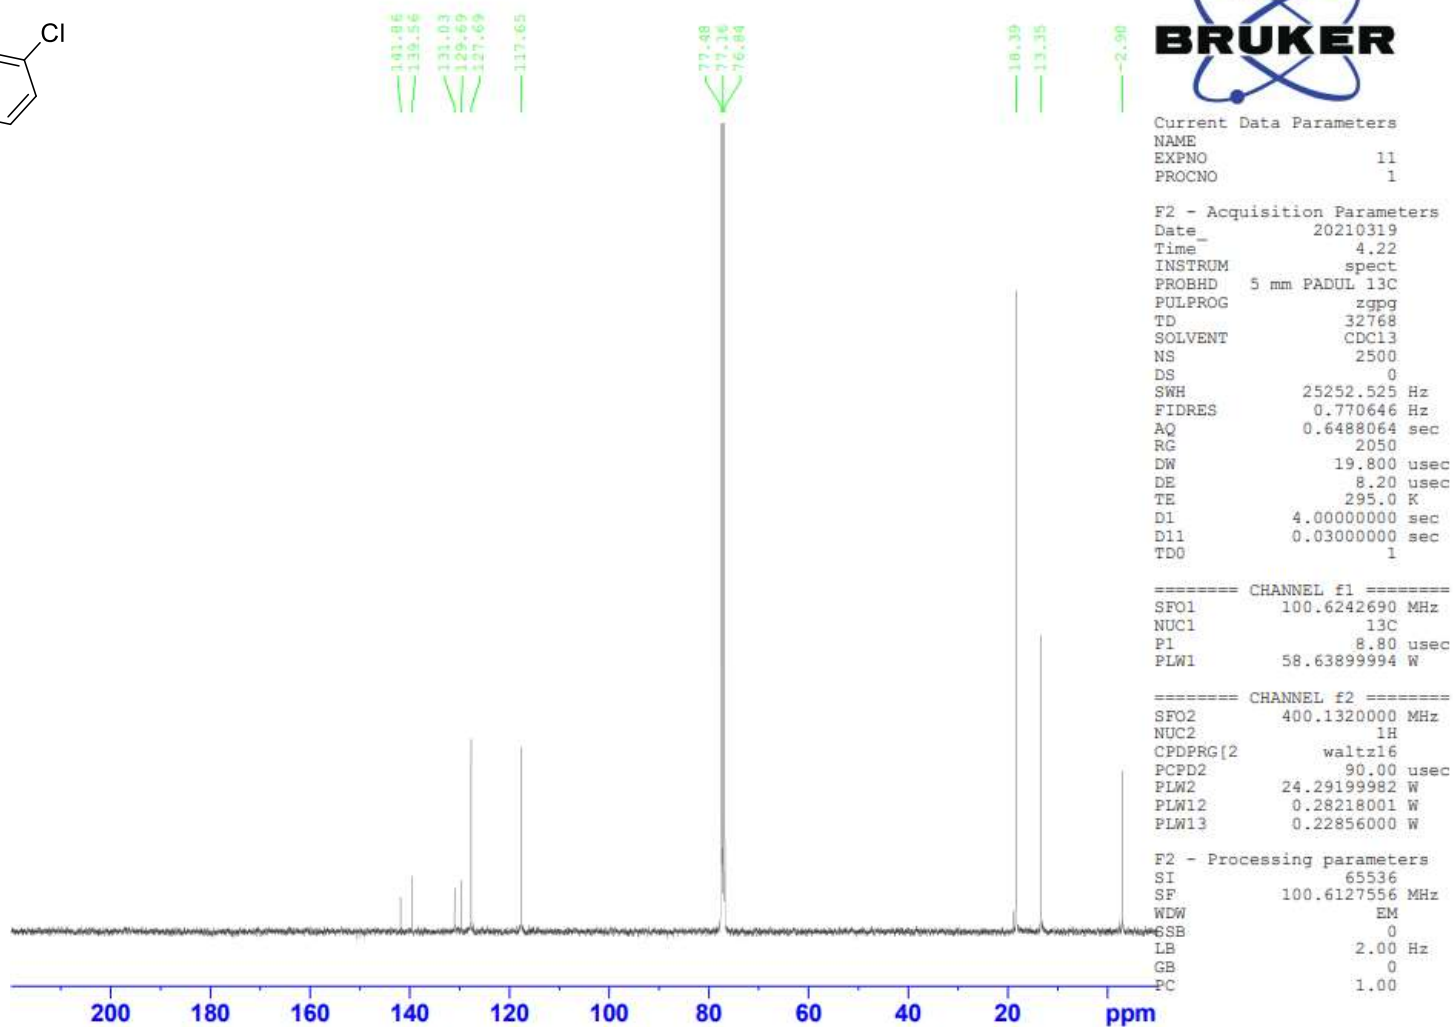

1,1'-(8,8-Dimethyl-4-(triisopropylsilyl)-4,8-dihydrosilolo[2,3,4,5-def]carbazole-1,7-diyl)bis(ethan-1-one) [16a]

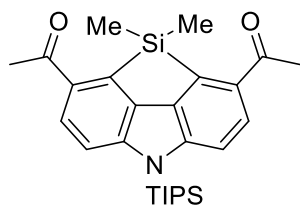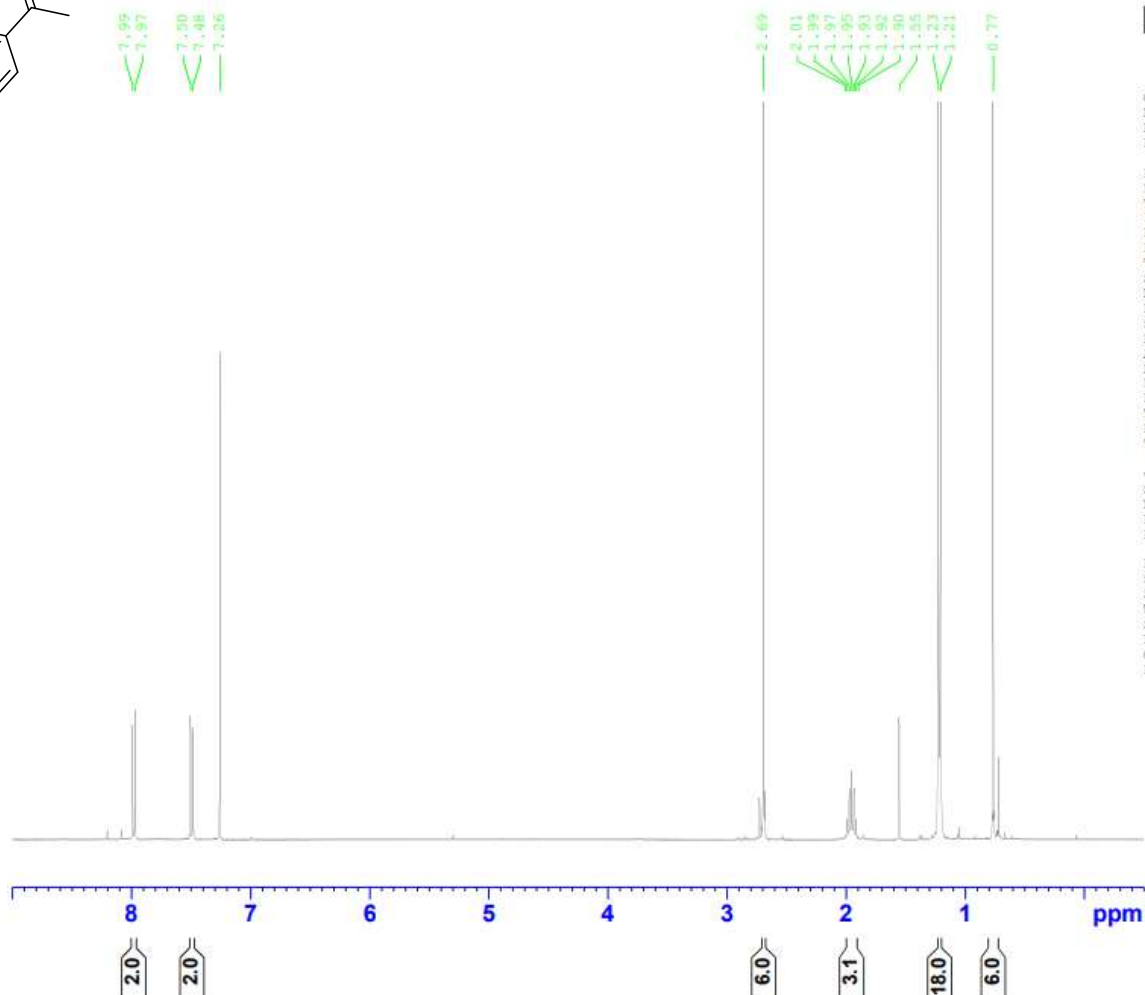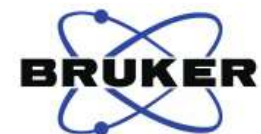

Current Data Parameters

|        |    |
|--------|----|
| NAME   |    |
| EXPNO  | 11 |
| PROCNO | 1  |

F2 - Acquisition Parameters

|         |                 |
|---------|-----------------|
| Date_   | 20210430        |
| Time    | 4.29            |
| INSTRUM | spect           |
| PROBHD  | 5 mm PADUL 13C  |
| PULPROG | zg              |
| TD      | 32768           |
| SOLVENT | CDCl3           |
| NS      | 64              |
| DS      | 2               |
| SWH     | 8223.685 Hz     |
| FIDRES  | 0.250967 Hz     |
| AQ      | 1.9922944 sec   |
| RG      | 322             |
| DW      | 60.800 usec     |
| DE      | 11.93 usec      |
| TE      | 294.6 K         |
| D1      | 15.00000000 sec |
| TD0     | 1               |

===== CHANNEL f1 =====

|      |                 |
|------|-----------------|
| SFO1 | 400.1324008 MHz |
| NUC1 | 1H              |
| P1   | 11.06 usec      |
| PLW1 | 24.29199982 W   |

F2 - Processing parameters

|     |                 |
|-----|-----------------|
| S1  | 32768           |
| SF  | 400.1300101 MHz |
| WDW | EM              |
| SSB | 0               |
| LB  | 0.30 Hz         |
| GB  | 0               |
| PC  | 1.00            |

1,1'-(8,8-Dimethyl-4-(triisopropylsilyl)-4,8-dihydrosilolo[2,3,4,5-def]carbazole-1,7-diyl)bis(ethan-1-one) [16a]

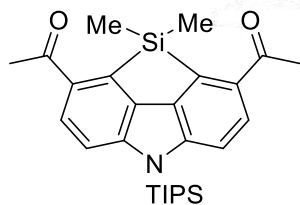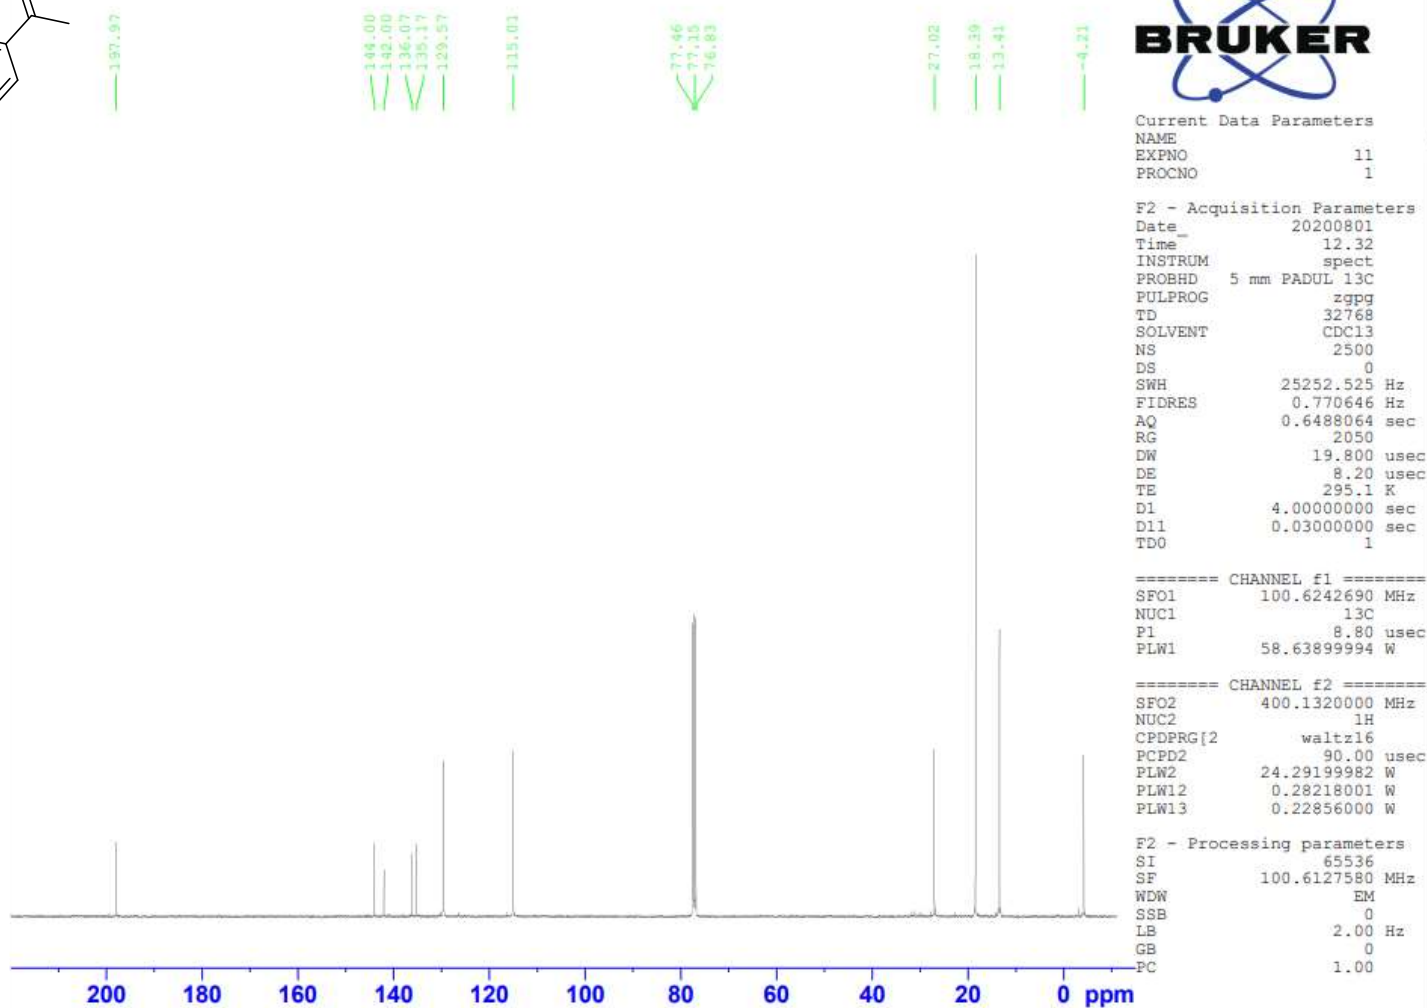

# 9-(Triisopropylsilyl)-9H-carbazol-4-ol [17a]

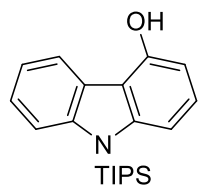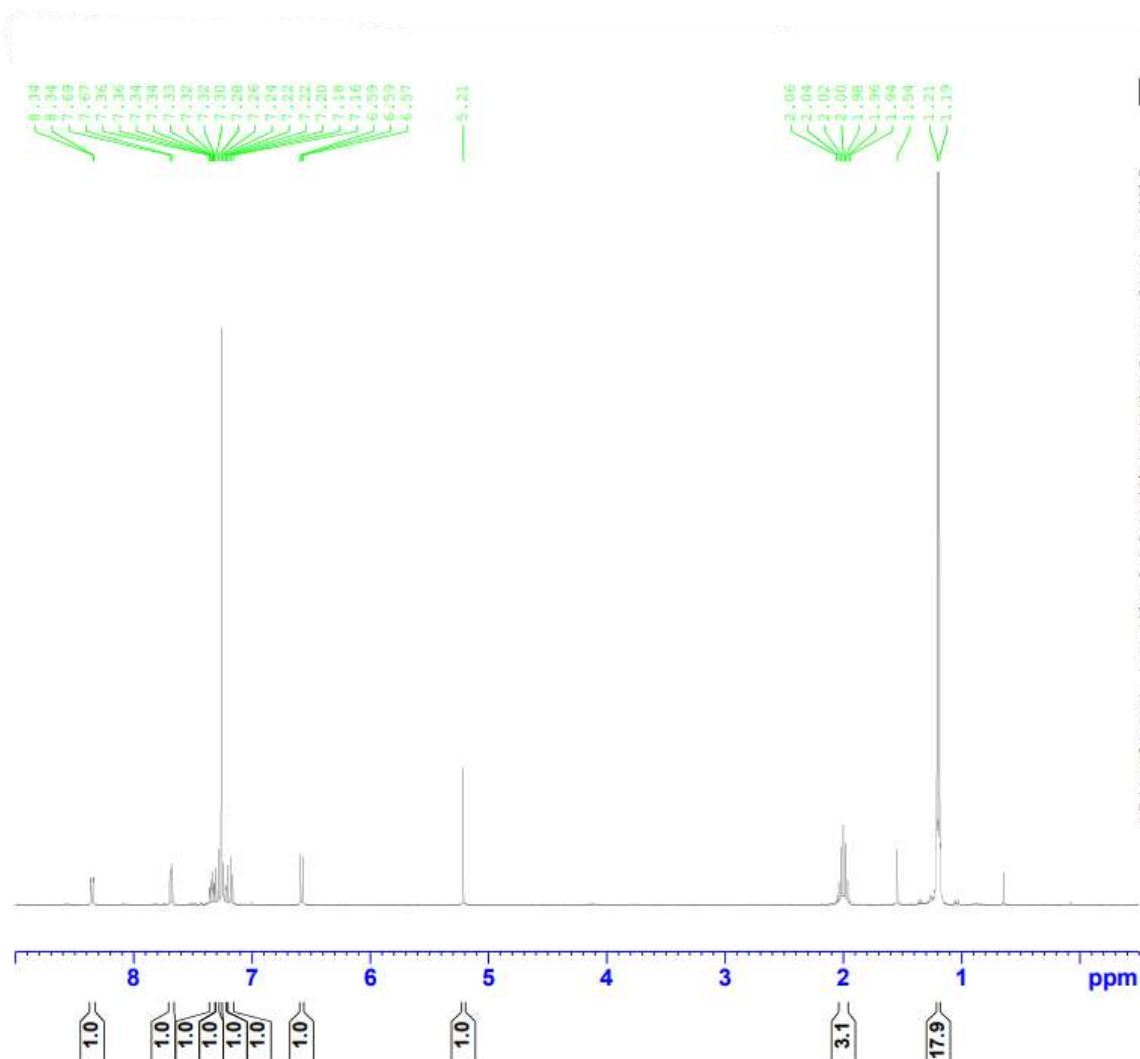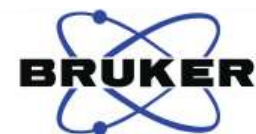

## Current Data Parameters

NAME  
EXPNO 10  
PROCNO 1

## F2 - Acquisition Parameters

Date\_ 20210224  
Time\_ 17.29 h  
INSTRUM AvanceNeo  
PROBHD Z116098\_0793 (   
PULPROG zg30  
TD 65536  
SOLVENT CDC13  
NS 4  
DS 0  
SWH 7142.857 Hz  
FIDRES 0.217983 Hz  
AQ 4.5875201 sec  
RG 101  
DW 70.000 usec  
DE 14.80 usec  
TE 298.0 K  
D1 2.00000000 sec  
TD0 1  
SFO1 400.1324008 MHz  
NUC1 1H  
P0 3.13 usec  
P1 9.40 usec  
PLW1 18.69700050 W

## F2 - Processing parameters

SI 131072  
SF 400.1300099 MHz  
WDW EM  
SSB 0  
LB 0.10 Hz  
GB 0  
PC 1.00

# 9-(Triisopropylsilyl)-9H-carbazol-4-ol [17a]

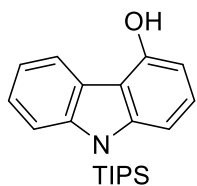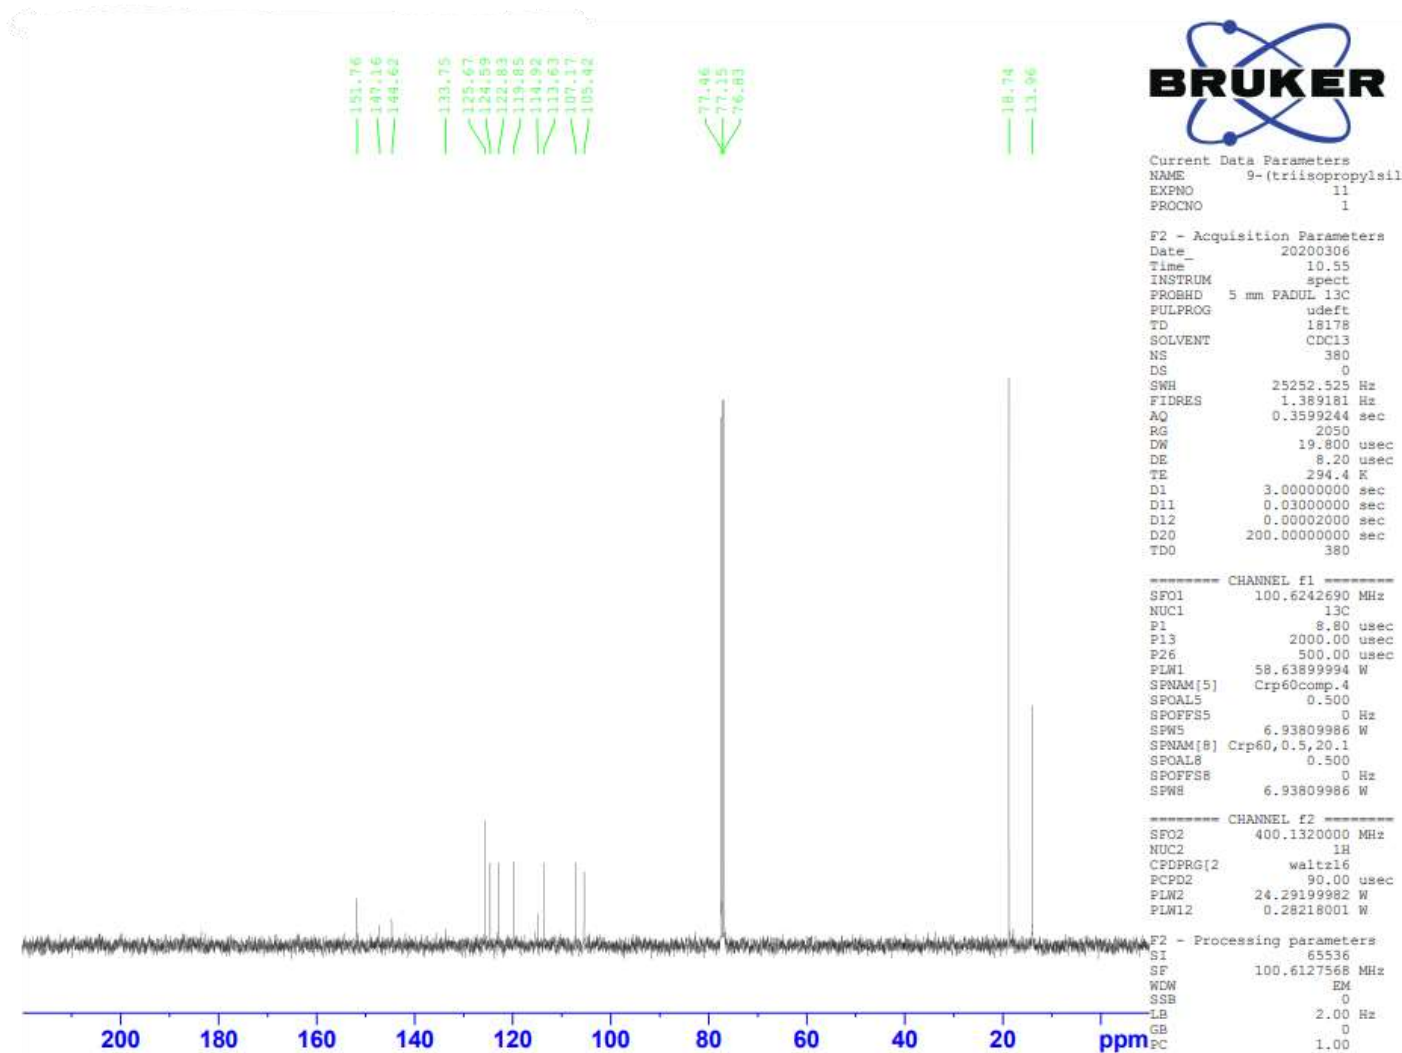

# 9H-Carbazol-4-ol [17b]

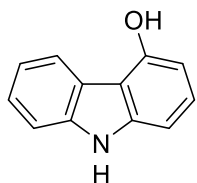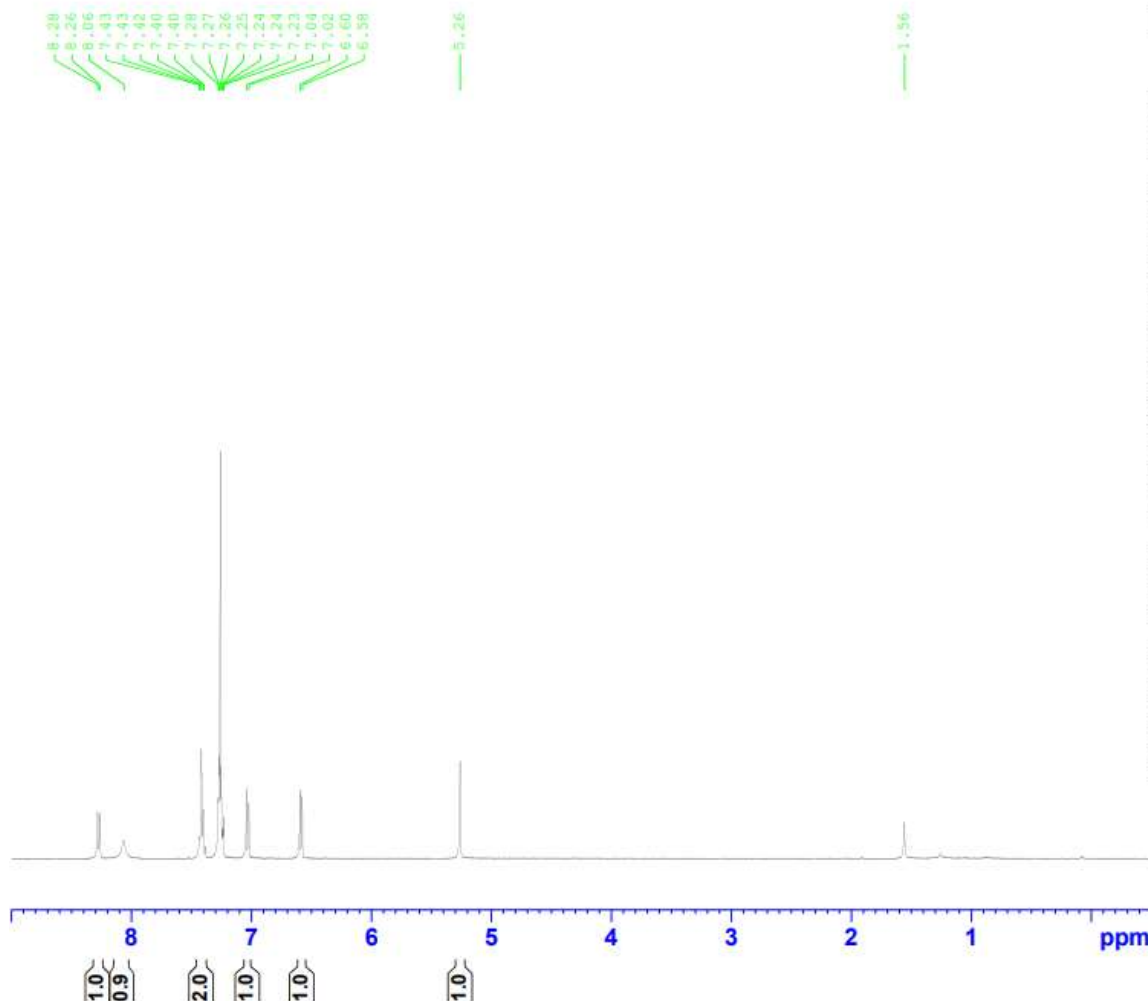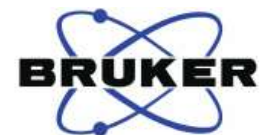

## Current Data Parameters

NAME  
EXPNO 101  
PROCNO 1

## F2 - Acquisition Parameters

Date\_ 20210326  
Time\_ 18.17  
INSTRUM spect  
PROBHD 5 mm PADUL 13C  
PULPROG zg30  
TD 32768  
SOLVENT CDC13  
NS 32  
DS 2  
SWH 8223.685 Hz  
FIDRES 0.250967 Hz  
AQ 1.9922944 sec  
RG 1030  
DW 60.800 usec  
DE 16.65 usec  
TE 294.6 K  
D1 1.50000000 sec  
TDO 1

## ===== CHANNEL f1 =====

SFO1 400.1324008 MHz  
NUC1 1H  
P1 11.06 usec  
PLW1 24.29199982 W

## F2 - Processing parameters

SI 32768  
SF 400.1300094 MHz  
WDW EM  
SSB 0  
LB 0.30 Hz  
GB 0  
PC 1.00

# 9H-Carbazol-4-ol [17b]

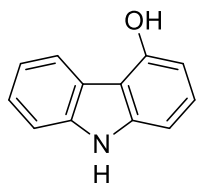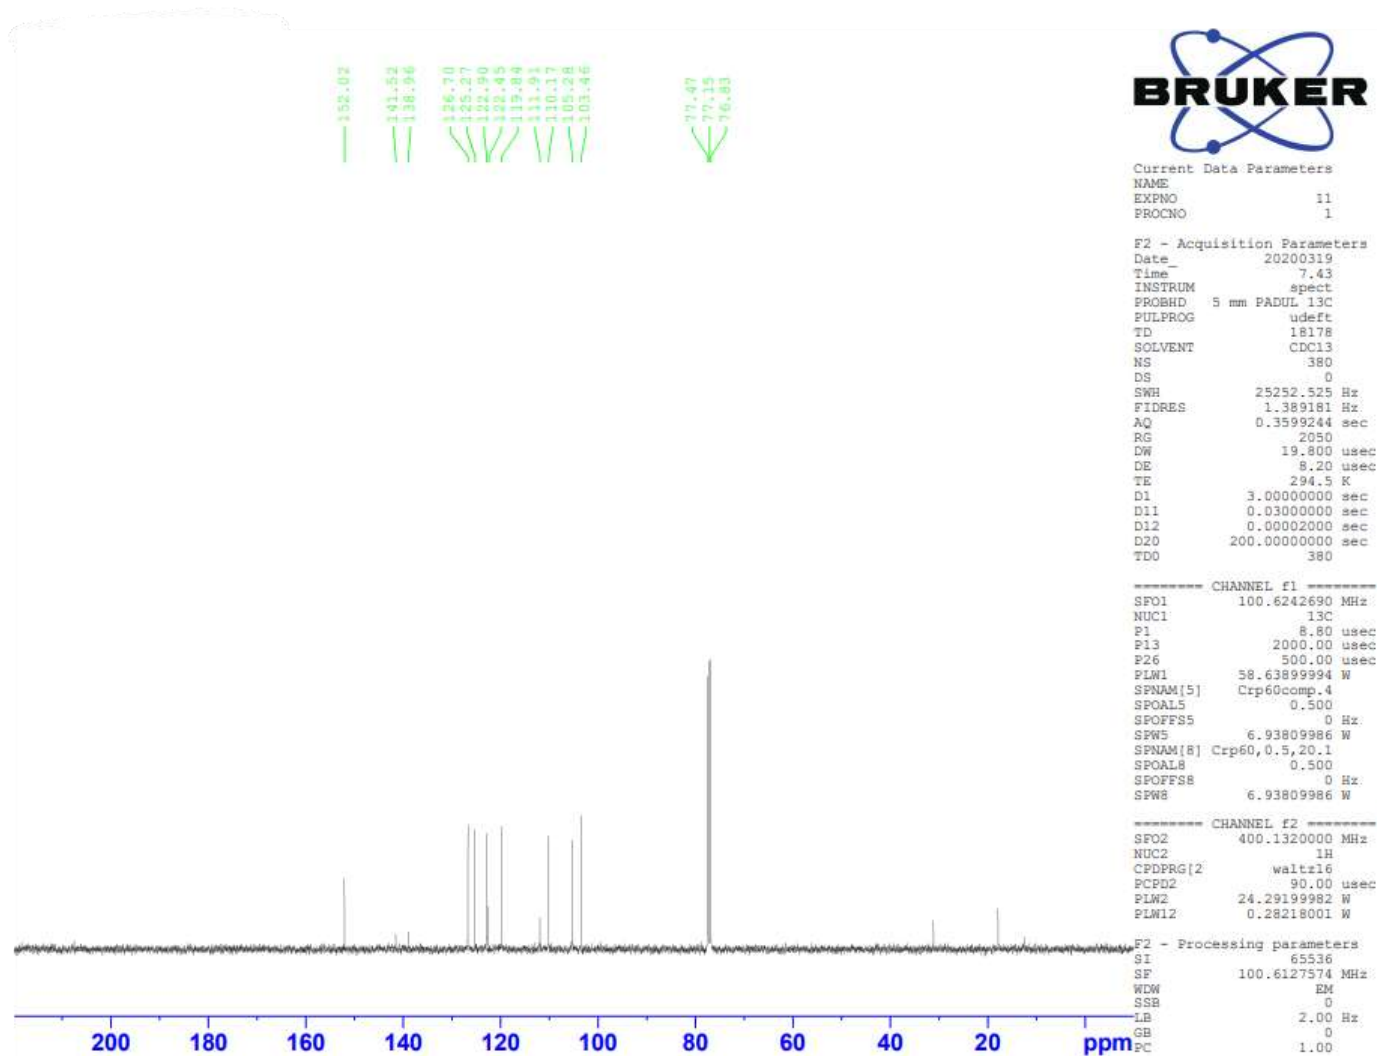

9-(Triisopropylsilyl)-9H-carbazole-4,5-diol [18a]

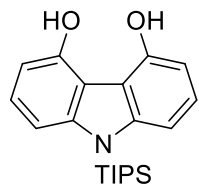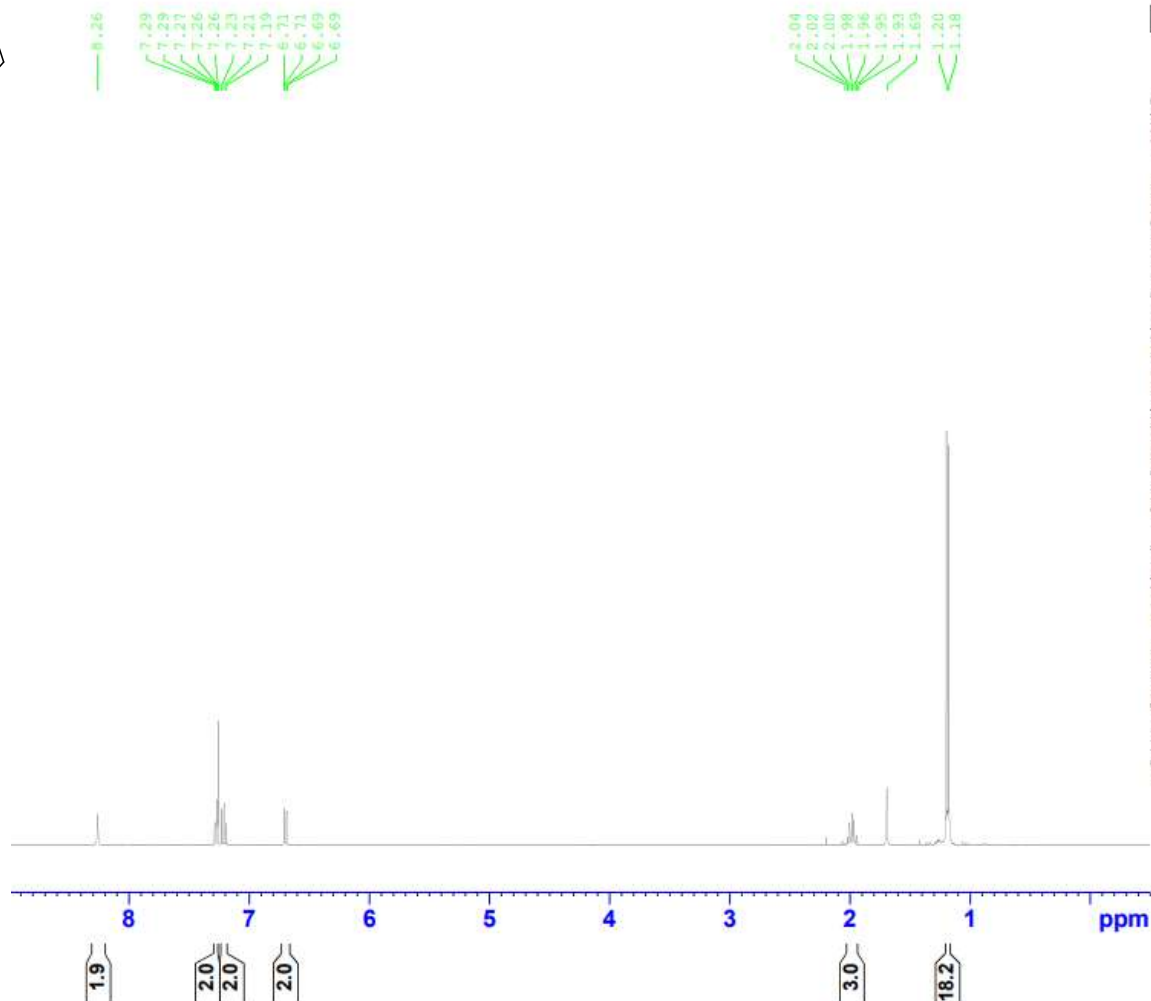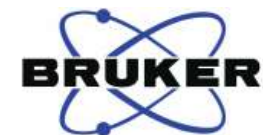

Current Data Parameters

NAME  
EXPNO 1  
PROCNO 1

F2 - Acquisition Parameters

Date\_ 20201021  
Time\_ 12.32  
INSTRUM spect  
PROBHD 5 mm PADUL 13C  
PULPROG zg30  
TD 32768  
SOLVENT CDCl3  
NS 32  
DS 2  
SWH 8223.685 Hz  
FIDRES 0.250967 Hz  
AQ 1.9922944 sec  
RG 575  
DW 60.800 usec  
DE 16.65 usec  
TE 294.3 K  
D1 1.50000000 sec  
TD0 1

===== CHANNEL f1 =====

SFO1 400.1324008 MHz  
NUC1 1H  
P1 11.06 usec  
PLW1 24.29199982 W

F2 - Processing parameters

SI 32768  
SF 400.1300100 MHz  
WDW EM  
SSB 0  
LB 0.30 Hz  
GB 0  
PC 1.00

9-(Triisopropylsilyl)-9H-carbazole-4,5-diol [18a]

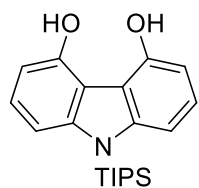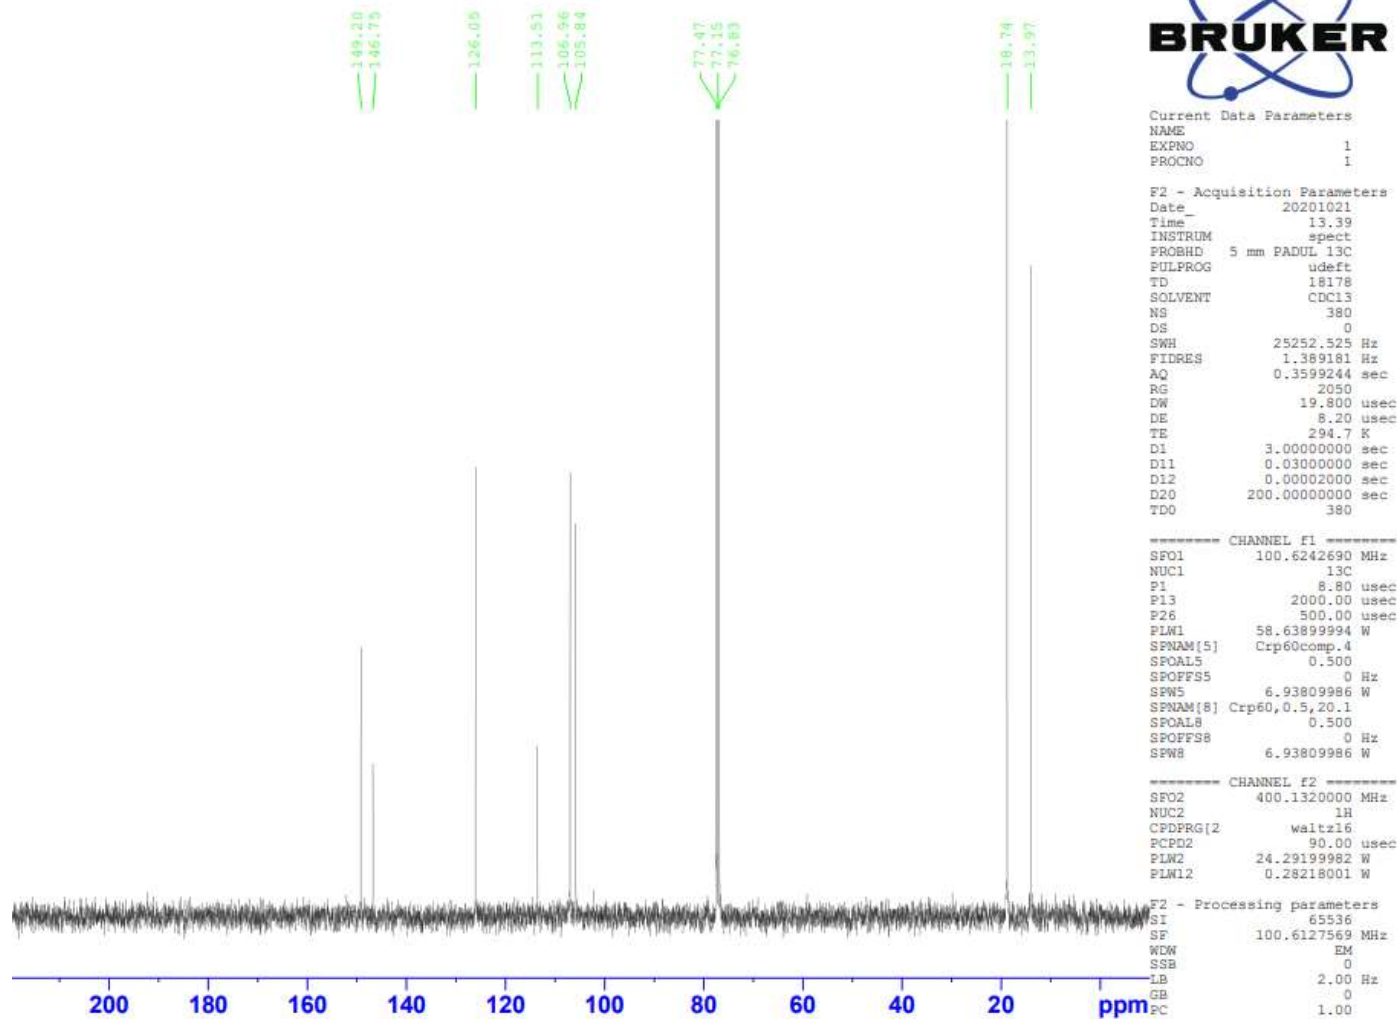

**9-Amino-4-(triisopropylsilyl)azepino[3,4,5,6-def]carbazole-8,10(4H,9H)-dione [19a]**

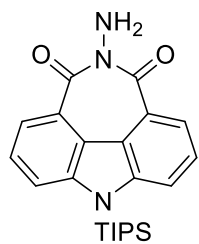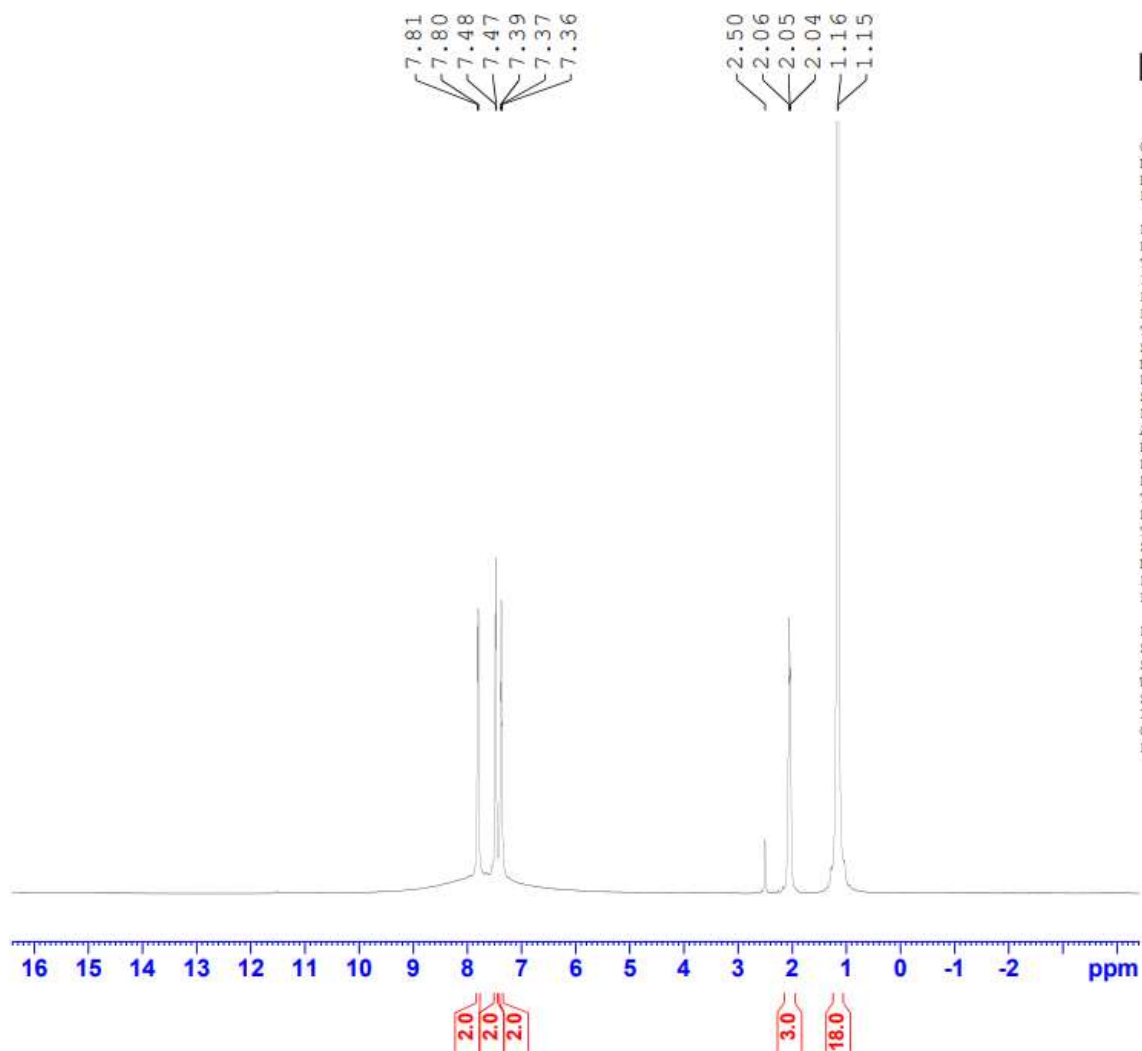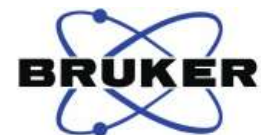

Current Data Parameters  
NAME  
EXPNO 10  
PROCNO 1

F2 - Acquisition Parameters  
Date\_ 20210427  
Time 13.13 h  
INSTRUM CAB AV4 500 MHZ BASIC  
PROBHD Z150364\_0007 ( )  
PULPROG zg  
TD 66560  
SOLVENT DMSO  
NS 16  
DS 0  
SWH 10416.667 Hz  
FIDRES 0.313001 Hz  
AQ 3.1948800 sec  
RG 62.5  
DW 48.000 usec  
DE 34.36 usec  
TE 298.0 K  
D1 10.00000000 sec  
TD0 1  
SFO1 500.0760004 MHz  
NUC1 1H  
P1 12.00 usec  
PLW1 14.55099964 W

F2 - Processing parameters  
SI 131072  
SF 500.0730027 MHz  
WDW EM  
SSB 0  
LB 0.10 Hz  
GB 0  
PC 1.00

**9-Amino-4-(triisopropylsilyl)azepino[3,4,5,6-def]carbazole-8,10(4H,9H)-dione [19a]**

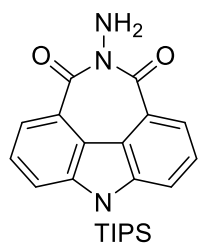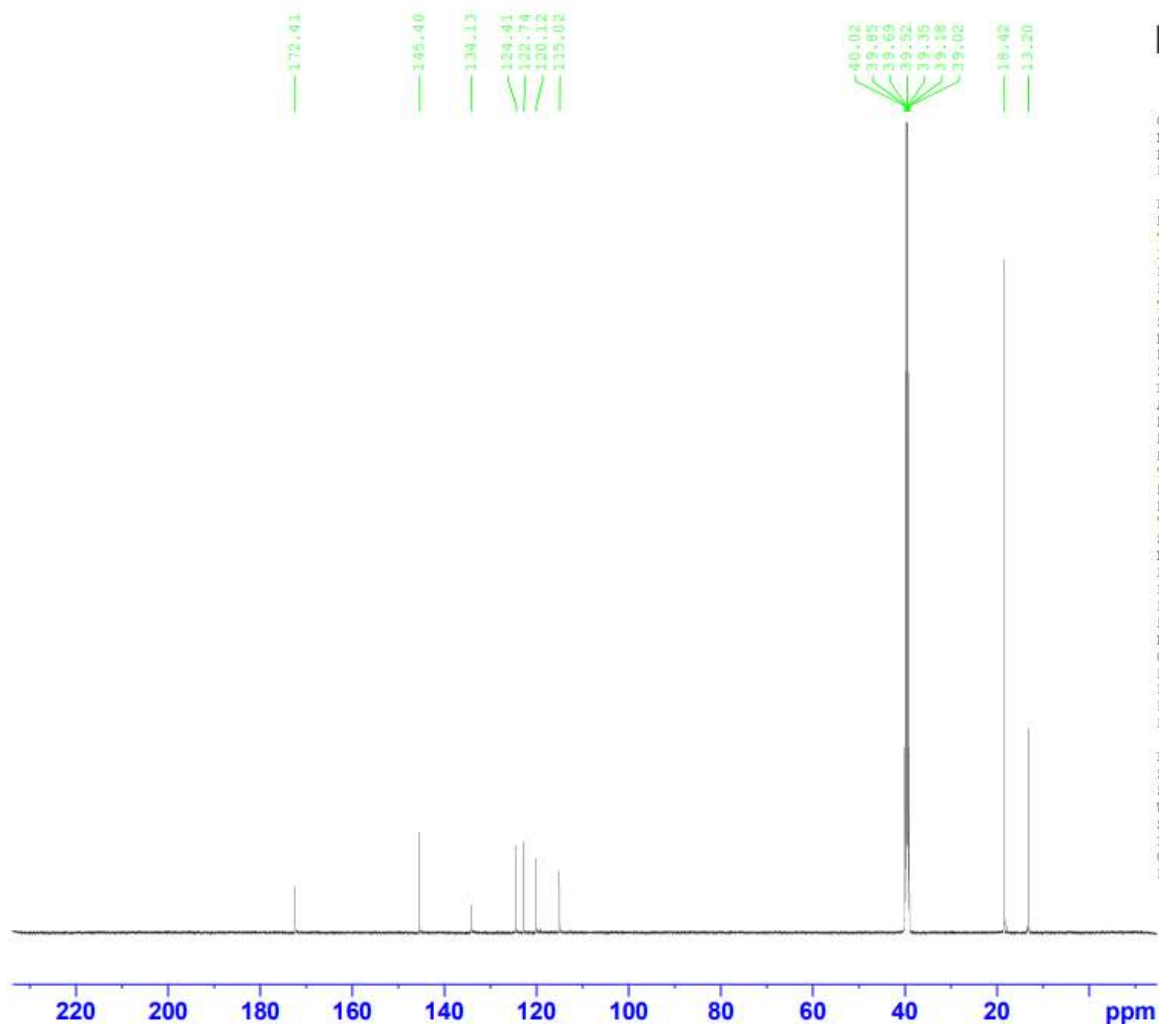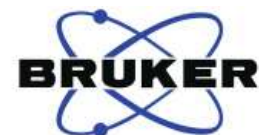

Current Data Parameters  
NAME  
EXPNO 12  
PROCNO 1

F2 - Acquisition Parameters  
Date\_ 20210427  
Time\_ 13.51 h  
INSTRUM CAB AV4 500 MHZ BASIC  
PROBHD Z150364 0007 {  
PULPROG zgpg30  
TD 119044  
SOLVENT DMSO  
NS 600  
DS 0  
SWH 31250.000 Hz  
FIDRES 0.525016 Hz  
AQ 1.9047040 sec  
RG 101  
DW 16.000 usec  
DE 18.29 usec  
TE 298.0 K  
D1 1.00000000 sec  
D11 0.03000000 sec  
TD0 1  
SFO1 125.7572860 MHz  
NUC1 13C  
P0 3.33 usec  
P1 10.00 usec  
PLW1 61.18099976 W  
SFO2 500.0750003 MHz  
NUC2 1H  
CPDPRG{2 waltz64  
PCPD2 80.00 usec  
PLW2 14.55099964 W  
PLW12 0.32740000 W  
PLW13 0.16468000 W

F2 - Processing parameters  
SI 131072  
SF 125.7435153 MHz  
WDW EM  
SSB 0  
LB 1.00 Hz  
GB 0  
PC 1.40

4-(Triisopropylsilyl)-8,10-dihydro-4H-oxepino[3,4,5,6-def]carbazole [20a]

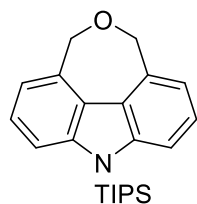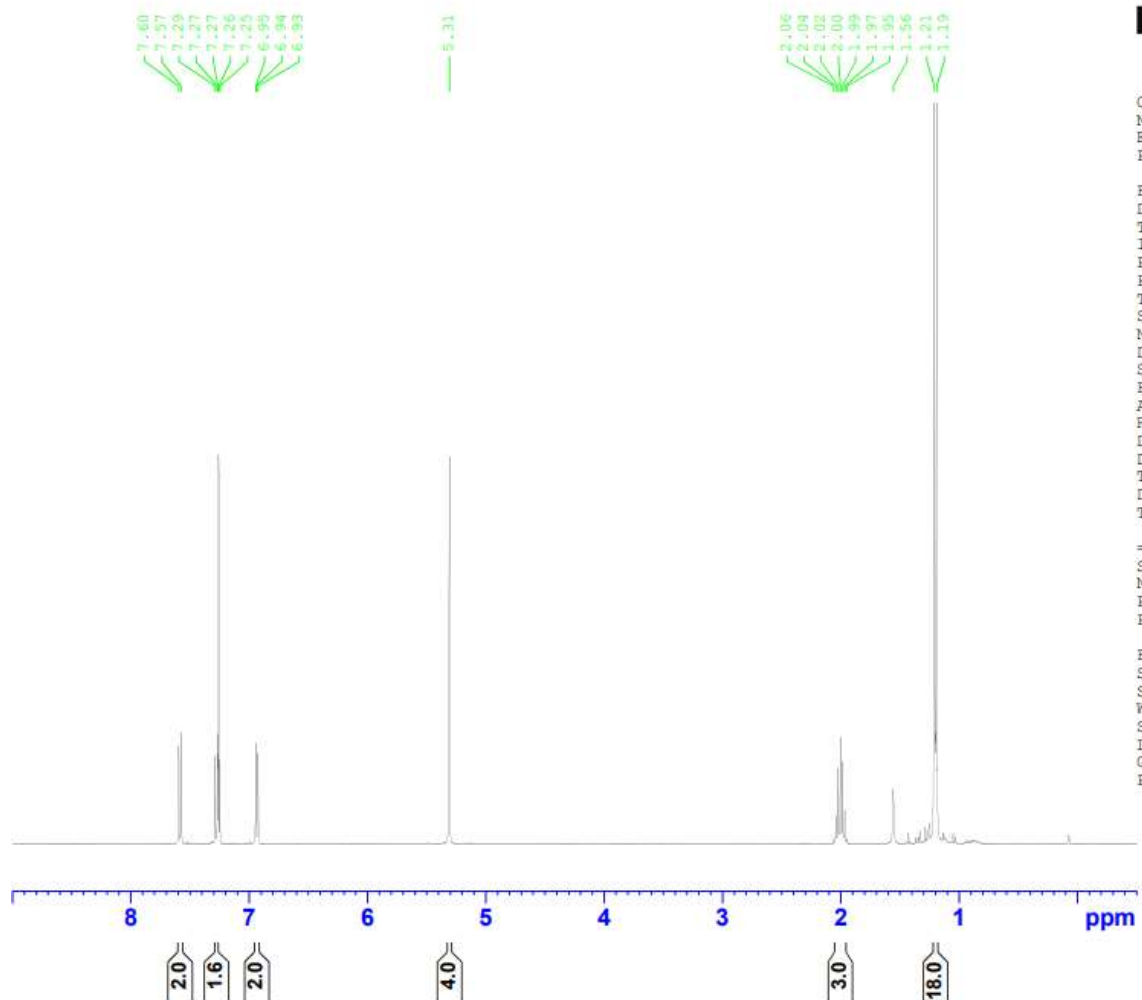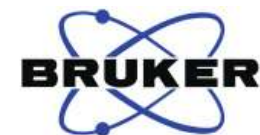

Current Data Parameters

NAME  
EXPNO 16  
PROCNO 1

F2 - Acquisition Parameters

Date\_ 20201105  
Time\_ 19.35  
INSTRUM spect  
PROBHD 5 mm PADUL 13C  
PULPROG zg  
TD 32768  
SOLVENT CDCl3  
NS 64  
DS 2  
SWH 8223.685 Hz  
FIDRES 0.250967 Hz  
AQ 1.9922944 sec  
RG 203  
DW 60.800 usec  
DE 11.93 usec  
TE 294.8 K  
D1 15.00000000 sec  
TD0 1

===== CHANNEL f1 =====

SFO1 400.1324008 MHz  
NUC1 1H  
P1 11.06 usec  
PLW1 24.29199982 W

F2 - Processing parameters

SI 32768  
SF 400.1300104 MHz  
WDW EM  
SSB 0  
LB 0.30 Hz  
GB 0  
PC 1.00

# 4-(Triisopropylsilyl)-8,10-dihydro-4H-oxepino[3,4,5,6-def]carbazole [20a]

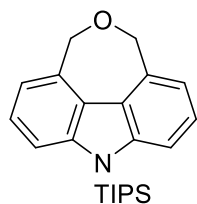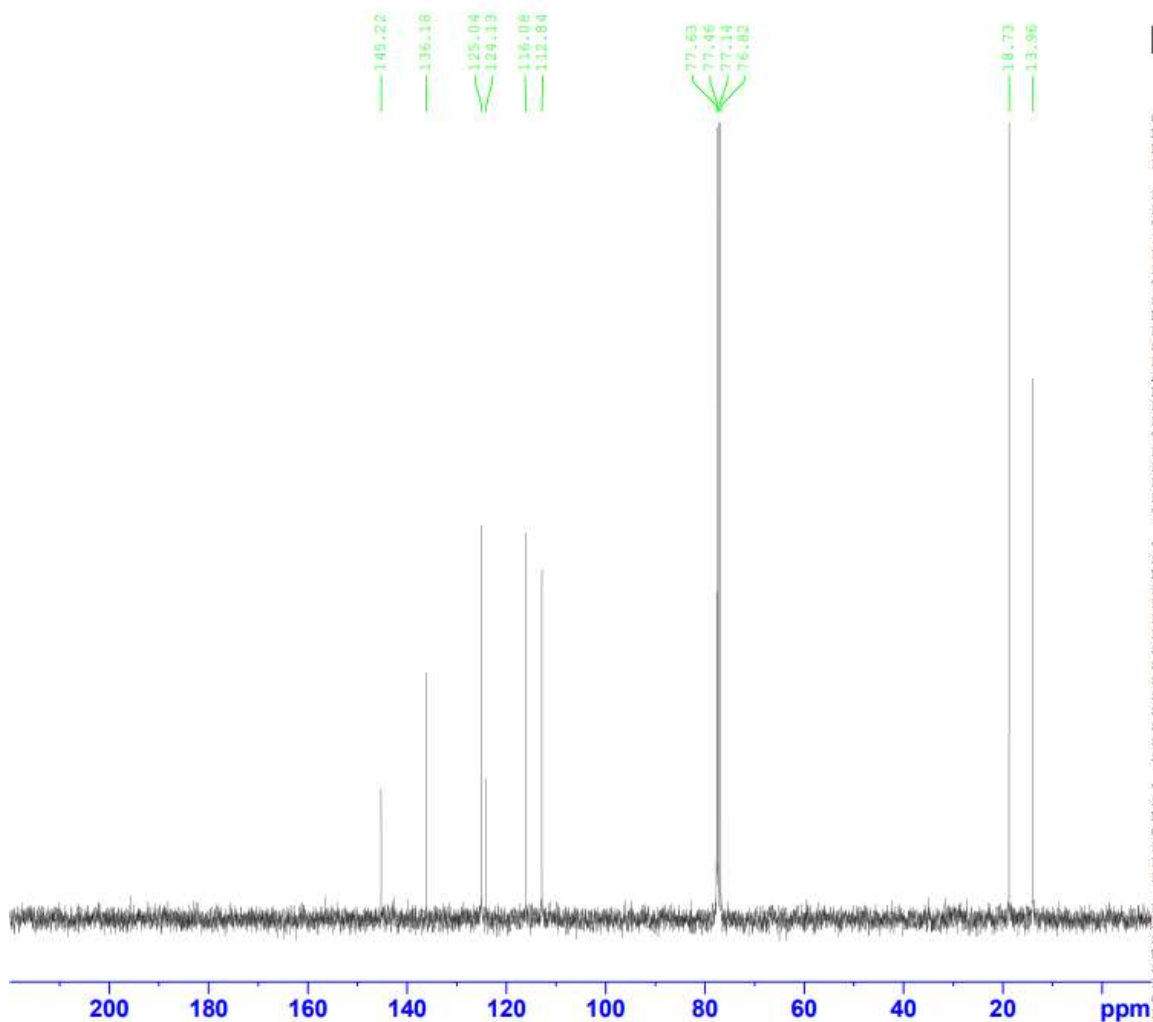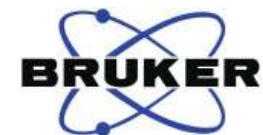

Current Data Parameters  
NAME AM80057-1 full  
EXPNO 11  
PROCNO 1

F2 - Acquisition Parameters  
Date\_ 20201104  
Time\_ 13.23  
INSTRUM spect  
PROBHD 5 mm PADUL 13C  
PULPROG udeft  
TD 18178  
SOLVENT CDC13  
NS 380  
DS 0  
SWH 25252.525 Hz  
FIDRES 1.389181 Hz  
AQ 0.3599244 sec  
RG 2050  
DW 19.800 usec  
DE 8.20 usec  
TE 294.5 K  
D1 3.00000000 sec  
D11 0.03000000 sec  
D12 0.00002000 sec  
D20 200.00000000 sec  
TD0 380

===== CHANNEL f1 =====  
SFO1 100.6242690 MHz  
NUC1 13C  
P1 8.80 usec  
P13 2000.00 usec  
P26 500.00 usec  
PLW1 58.63899994 W  
SPNAM[5] Crp60comp.4  
SFOALS 0.500  
SPOFFS5 0 Hz  
SPW5 6.93809986 W  
SPNAM[8] Crp60, 0.5, 20.1  
SFOALS 0.500  
SPOFFS8 0 Hz  
SPW8 6.93809986 W

===== CHANNEL f2 =====  
SFO2 400.1320000 MHz  
NUC2 1H  
CPDPRG[2] waltz16  
PCPD2 90.00 usec  
PLW2 24.29199982 W  
PLW12 0.28218001 W

F2 - Processing parameters  
SI 65536  
SF 100.6127577 MHz  
WDW EM  
SSB 0  
LB 2.00 Hz  
GB 0  
PC 1.00

# Iron hexacarbonyl complex [21a]

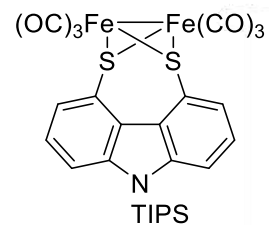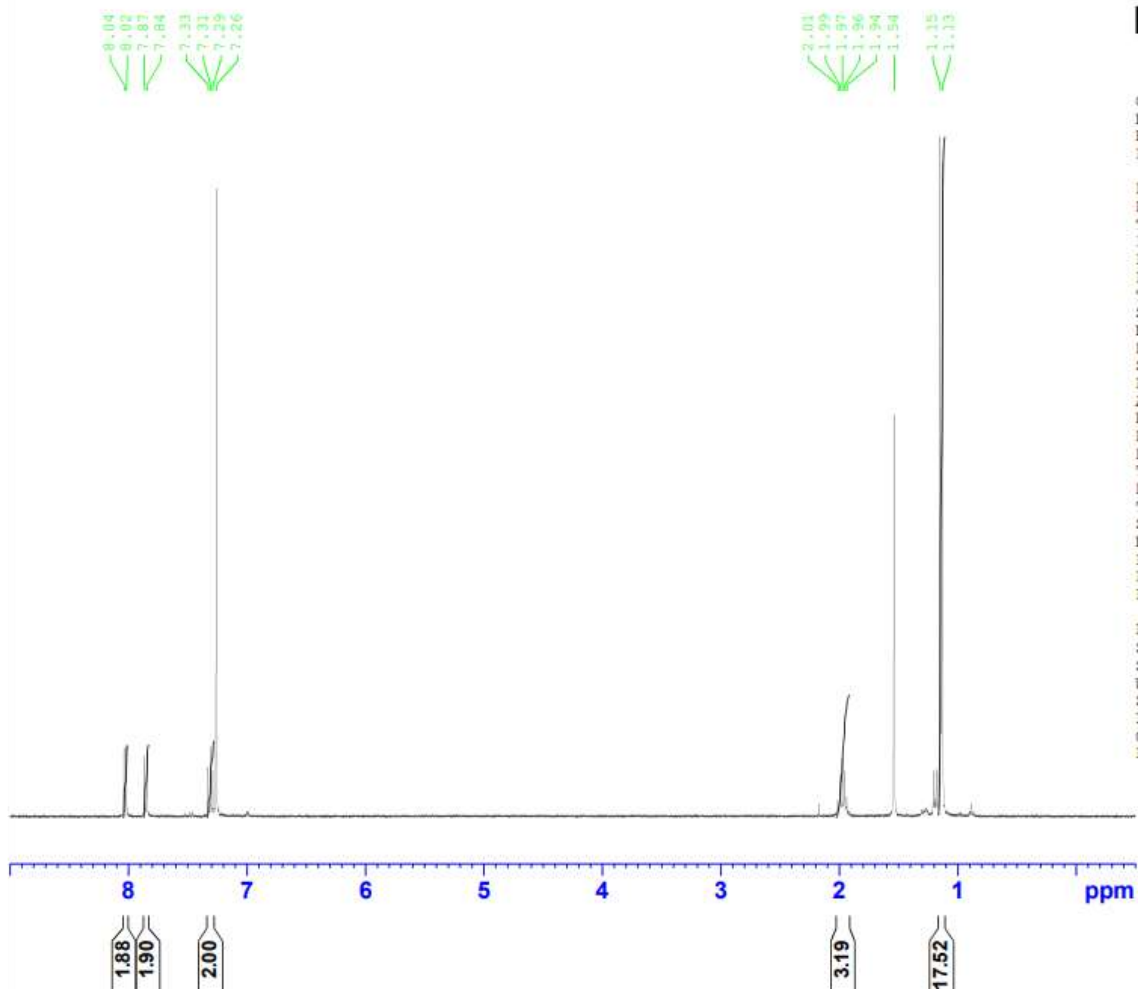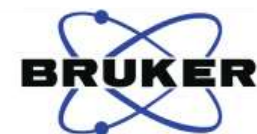

## Current Data Parameters

NAME  
 EXPNO 10  
 PROCNO 1

## F2 - Acquisition Parameters

Date\_ 20190731  
 Time\_ 11.36 h  
 INSTRUM AvanceNeo  
 PROBHD Z116098\_0793 (   
 PULPROG zg30  
 TD 65536  
 SOLVENT CDCl3  
 NS 2  
 DS 0  
 SWH 7142.857 Hz  
 FIDRES 0.217983 Hz  
 AQ 4.5875201 sec  
 RG 101  
 DW 70.000 usec  
 DE 14.62 usec  
 TE 298.0 K  
 D1 2.00000000 sec  
 TD0 1  
 SFO1 400.1324008 MHz  
 NUC1 1H  
 P0 3.33 usec  
 P1 10.00 usec  
 PLW1 18.69700050 W

## F2 - Processing parameters

SI 131072  
 SF 400.1300100 MHz  
 WDW EM  
 SSB 0  
 LB 0.10 Hz  
 GB 0  
 PC 1.00

# Iron hexacarbonyl complex [21a]

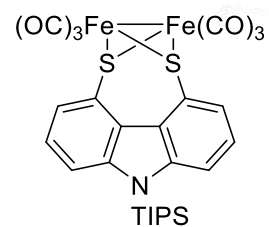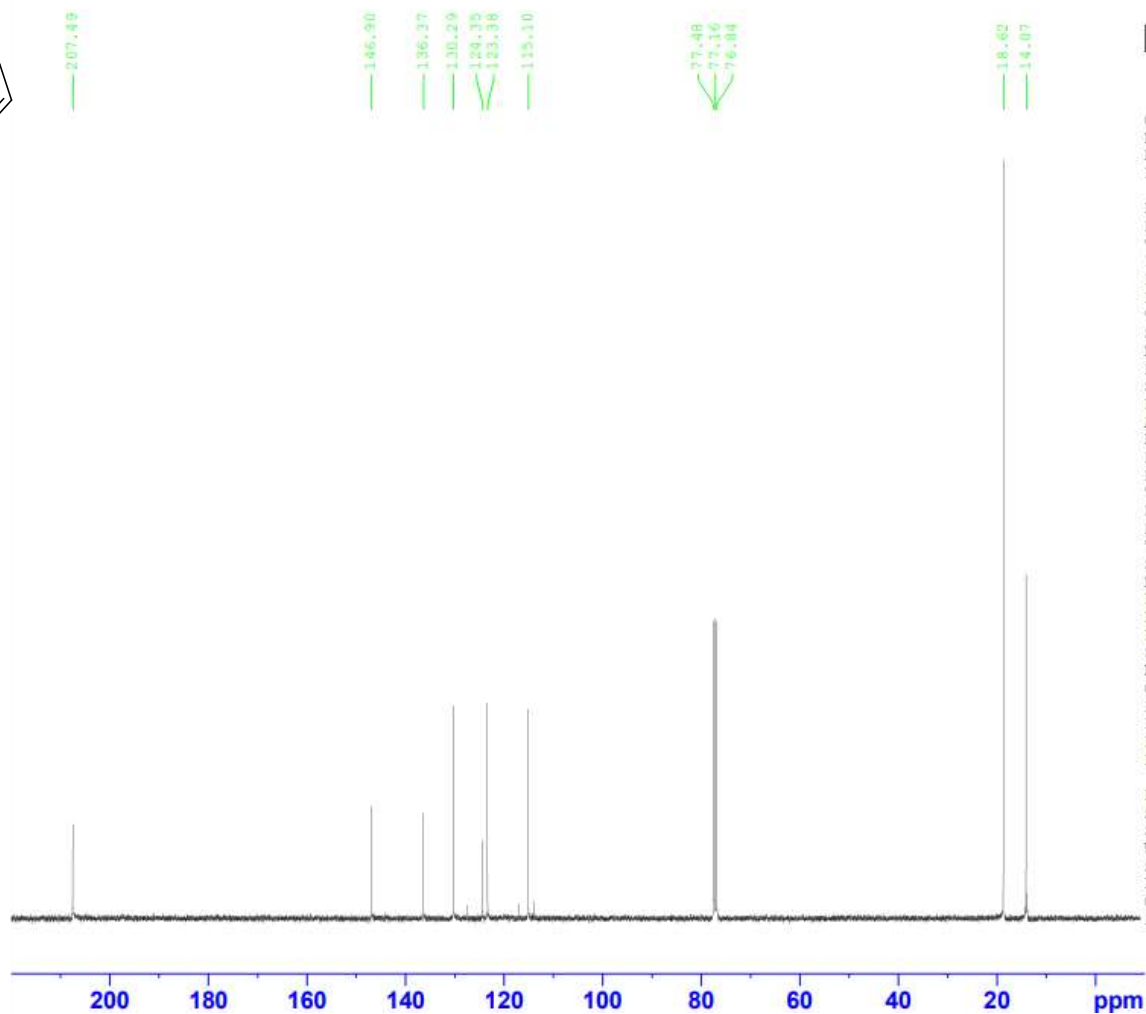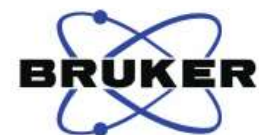

Current Data Parameters  
 NAME  
 EXPNO 23  
 PROCNO 1

F2 - Acquisition Parameters  
 Date 20190805  
 Time 20.15 h  
 INSTRUM AvanceNeo  
 PROBHD Z116098\_0793 (   
 PULPROG zgpg30  
 TD 119044  
 SOLVENT CDCl3  
 NS 512  
 DS 0  
 SWH 25000.000 Hz  
 FIDRES 0.420013 Hz  
 AQ 2.3808801 sec  
 RG 31.9602  
 DW 20.000 usec  
 DE 7.12 usec  
 TE 298.0 K  
 D1 1.00000000 sec  
 D11 0.03000000 sec  
 TD0 1  
 SFO1 100.6243390 MHz  
 NUC1 13C  
 P0 3.33 usec  
 P1 10.00 usec  
 PLW1 83.92700195 W  
 SFO2 400.1318006 MHz  
 NUC2 1H  
 CPDPRG[2] waltz64  
 PCPD2 90.00 usec  
 PLW2 18.69700050 W  
 PLW12 0.23083000 W  
 PLW13 0.11611000 W

F2 - Processing parameters  
 SI 131072  
 SF 100.6127572 MHz  
 WDW EM  
 SSB 0  
 LB 1.00 Hz  
 GB 0  
 PC 1.40

**(9-(Triisopropylsilyl)-9H-carbazol-4-yl)methanol [22a]**

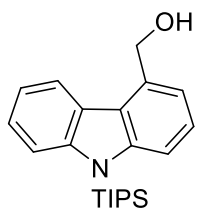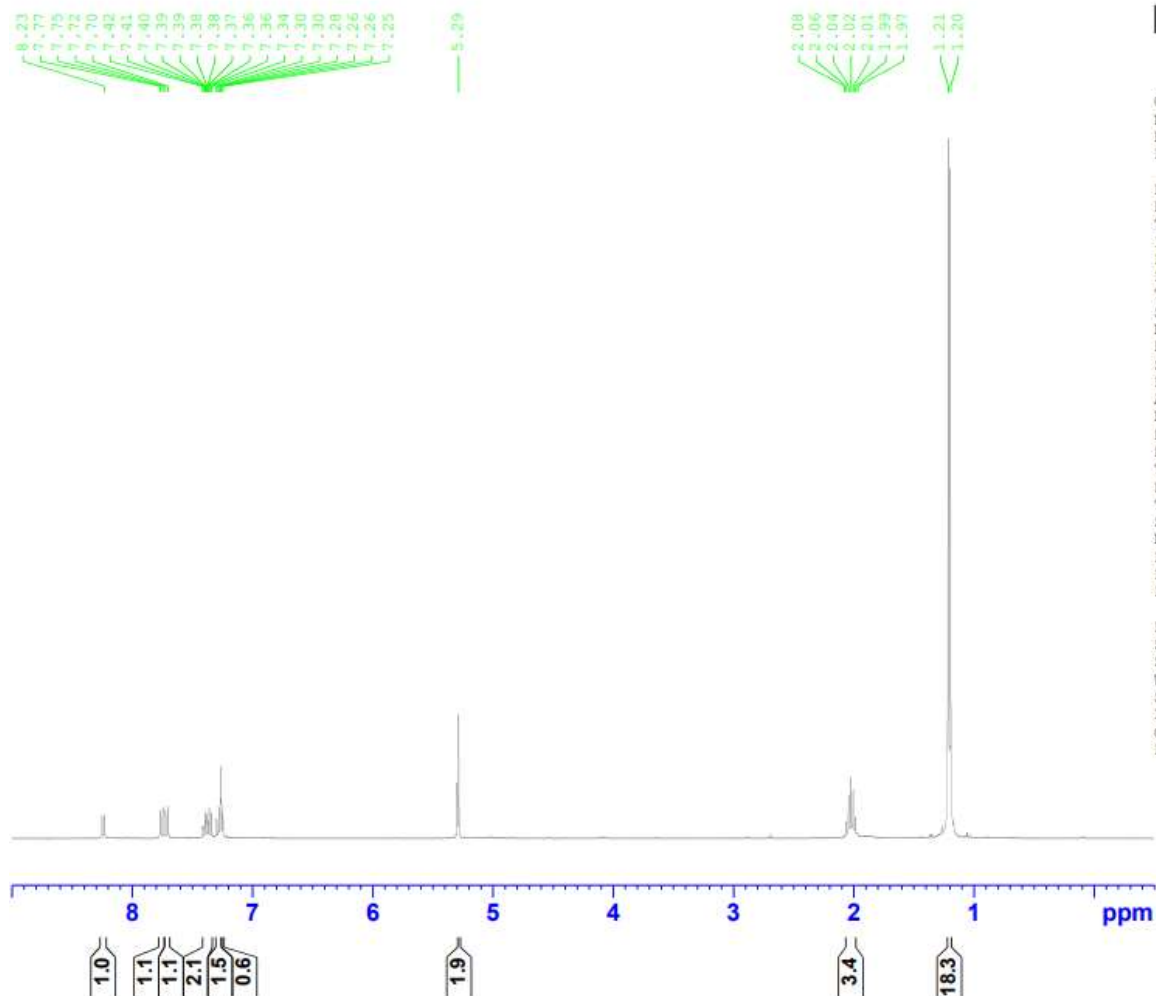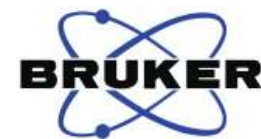

Current Data Parameters

NAME  
EXPNO 10  
PROCNO 1

F2 - Acquisition Parameters

Date\_ 20210430  
Time\_ 12.34 h  
INSTRUM AvanceNeo  
PROBHD Z116098\_0793 (   
PULPROG zg30  
TD 65536  
SOLVENT CDCl3  
NS 4  
DS 0  
SWH 7142.857 Hz  
FIDRES 0.217983 Hz  
AQ 4.5875201 sec  
RG 92.3077  
DW 70.000 usec  
DE 14.80 usec  
TE 298.0 K  
D1 2.00000000 sec  
TD0 1  
SFO1 400.1324008 MHz  
NUC1 1H  
P0 3.13 usec  
P1 9.40 usec  
PLW1 18.69700050 W

F2 - Processing parameters

SI 131072  
SF 400.1300098 MHz  
WDW EM  
SSB 0  
LB 0.10 Hz  
GB 0  
PC 1.00

(9-(Triisopropylsilyl)-9H-carbazol-4-yl)methanol [22a]

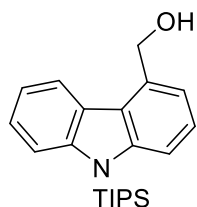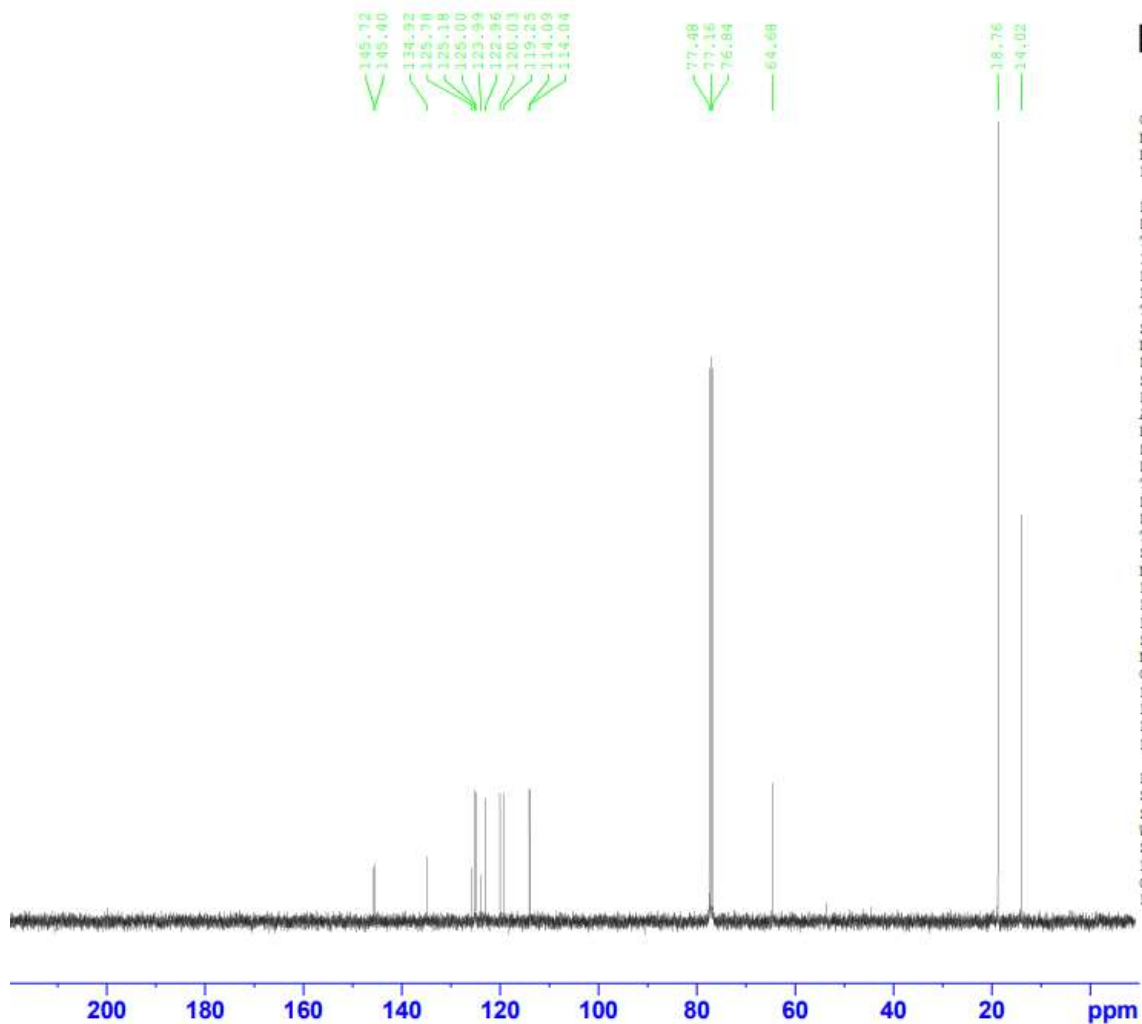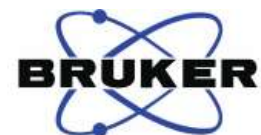

Current Data Parameters

NAME  
EXPNO 12  
PROCNO 1

F2 - Acquisition Parameters

Date\_ 20210501  
Time 1.06 h  
INSTRUM AvanceNeo  
PROBHD 2116098\_0793 (   
PULPROG zgpg30  
TD 119044  
SOLVENT CDC13  
NS 512  
DS 0  
SWH 25000.000 Hz  
FIDRES 0.420013 Hz  
AQ 2.3808801 sec  
RG 9.375  
DW 20.000 usec  
DE 7.12 usec  
TE 298.0 K  
D1 1.00000000 sec  
D11 0.03000000 sec  
TD0 1  
SFO1 100.6243390 MHz  
NUC1 13C  
P0 3.33 usec  
P1 10.00 usec  
PLW1 83.92700195 W  
SFO2 400.1318006 MHz  
NUC2 1H  
CPDPRG[2] waltz64  
PCPD2 90.00 usec  
PLW2 18.69700050 W  
PLW12 0.20396000 W  
PLW13 0.10259000 W

F2 - Processing parameters

SI 131072  
SF 100.6127565 MHz  
WDW EM  
SSB 0  
LB 1.00 Hz  
GB 0  
PC 1.40

### 3-Methoxy-9-(Triisopropylsilyl)-9H-carbazole [23a]

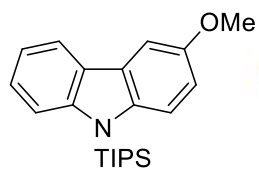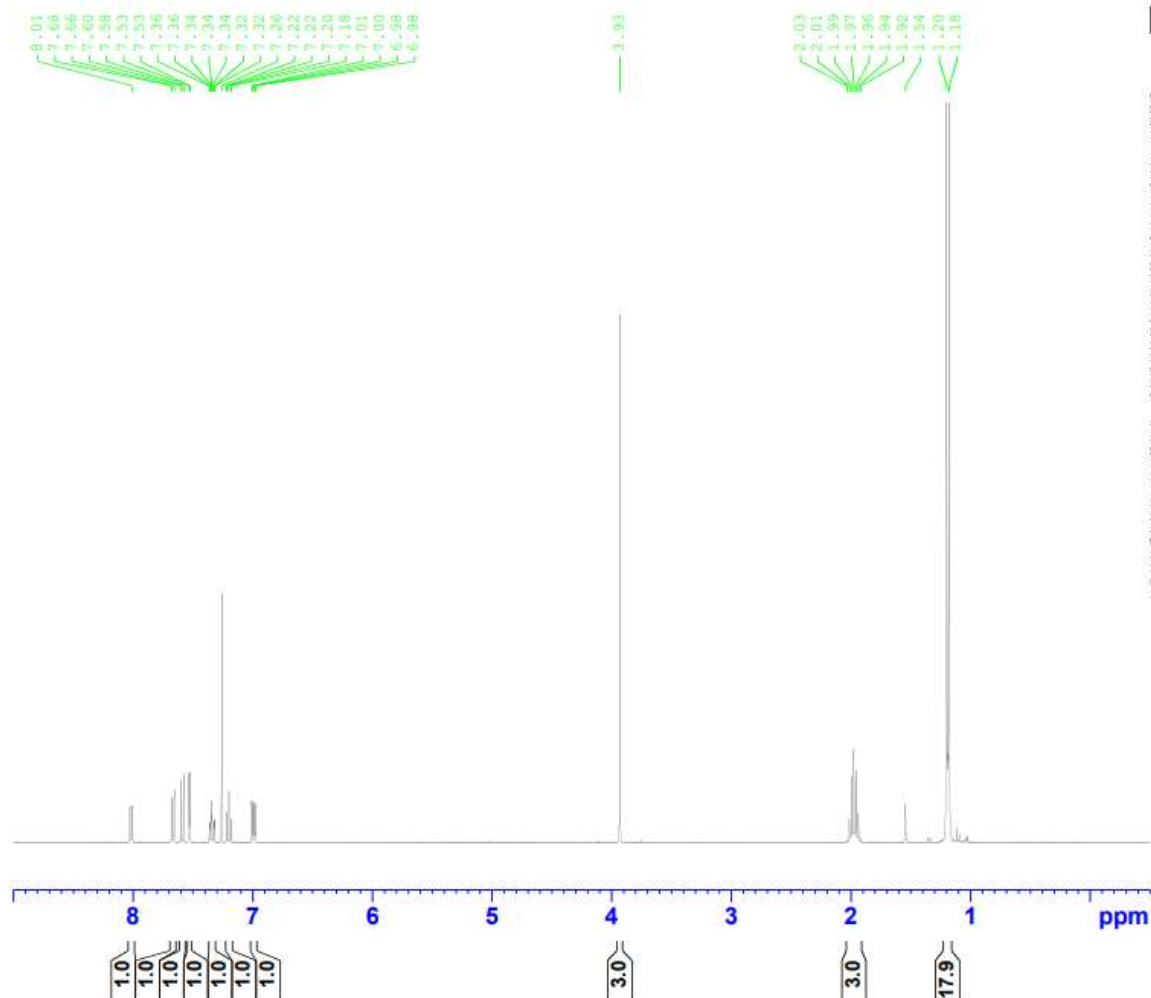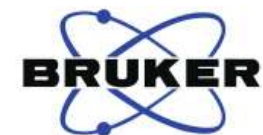

Current Data Parameters

|        |    |
|--------|----|
| NAME   | 11 |
| EXPNO  | 1  |
| PROCNO | 1  |

F2 - Acquisition Parameters

|         |                 |
|---------|-----------------|
| Date_   | 20210430        |
| Time_   | 4.05            |
| INSTRUM | spect           |
| PROBHD  | 5 mm PABUL 13C  |
| PULPROG | zg              |
| TD      | 32768           |
| SOLVENT | CDCl3           |
| NS      | 64              |
| DS      | 2               |
| SWH     | 8223.685 Hz     |
| FIDRES  | 0.250967 Hz     |
| AQ      | 1.9922944 sec   |
| RG      | 203             |
| DW      | 60.800 usec     |
| DE      | 11.93 usec      |
| TE      | 294.6 K         |
| D1      | 15.00000000 sec |
| TD0     | 1               |

===== CHANNEL f1 =====

|      |                 |
|------|-----------------|
| SFO1 | 400.1324008 MHz |
| NUC1 | 1H              |
| P1   | 11.06 usec      |
| PLW1 | 24.29199982 W   |

F2 - Processing parameters

|     |                 |
|-----|-----------------|
| SI  | 32768           |
| SF  | 400.1300097 MHz |
| WDW | EM              |
| SSB | 0               |
| LB  | 0.30 Hz         |
| GB  | 0               |
| PC  | 1.00            |

### 3-Methoxy-9-(triisopropylsilyl)-9H-carbazole [23a]

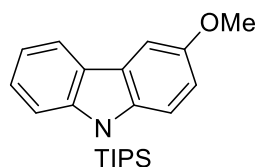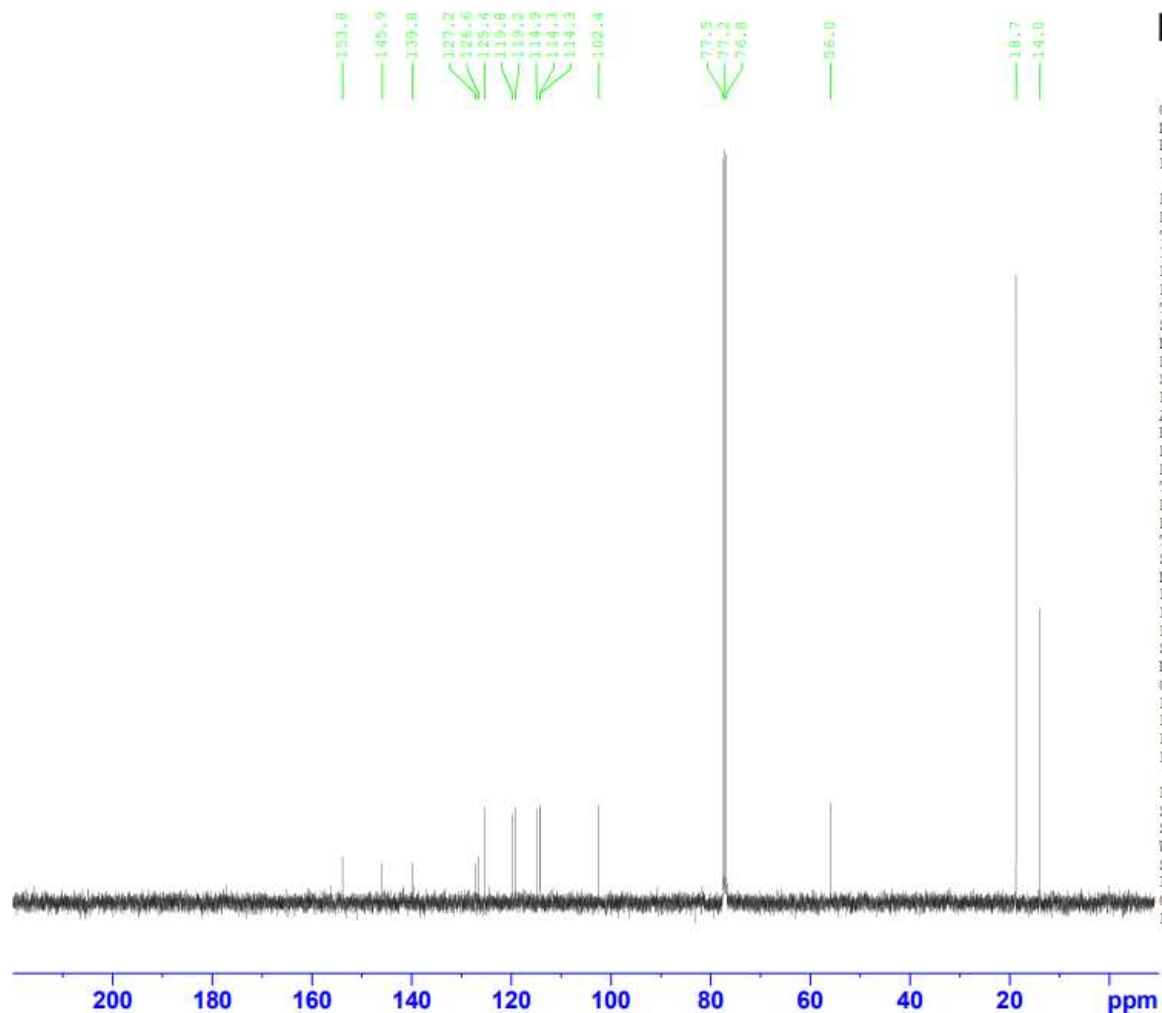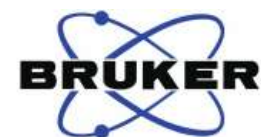

Current Data Parameters  
NAME  
EXPNO 12  
PROCNO 1

F2 - Acquisition Parameters  
Date\_ 20210501  
Time\_ 1.58 h  
INSTRUM AvanceNeo  
PROBHD Z116098\_0793 (   
PULPROG zgpg30  
TD 119044  
SOLVENT CDC13  
NS 512  
DS 0  
SWH 25000.000 Hz  
FIDRES 0.420013 Hz  
AQ 2.3808801 sec  
RG 9.375  
DW 20.000 usec  
DE 7.12 usec  
TE 298.0 K  
D1 1.00000000 sec  
D11 0.03000000 sec  
TD0 1  
SFO1 100.6243390 MHz  
NUC1 13C  
P0 3.33 usec  
P1 10.00 usec  
PLW1 83.92700195 W  
SFO2 400.1318006 MHz  
NUC2 1H  
CPDPRG[2] waltz64  
PCPD2 90.00 usec  
PLW2 18.69700050 W  
PLW12 0.20396000 W  
PLW13 0.10259000 W

F2 - Processing parameters  
SI 131072  
SF 100.6127555 MHz  
WDW EM  
SSB 0  
LB 1.00 Hz  
GB 0  
PC 1.40

### 3,6-Dimethoxy-9-(triisopropylsilyl)-9H-carbazole [24a]

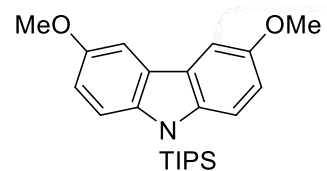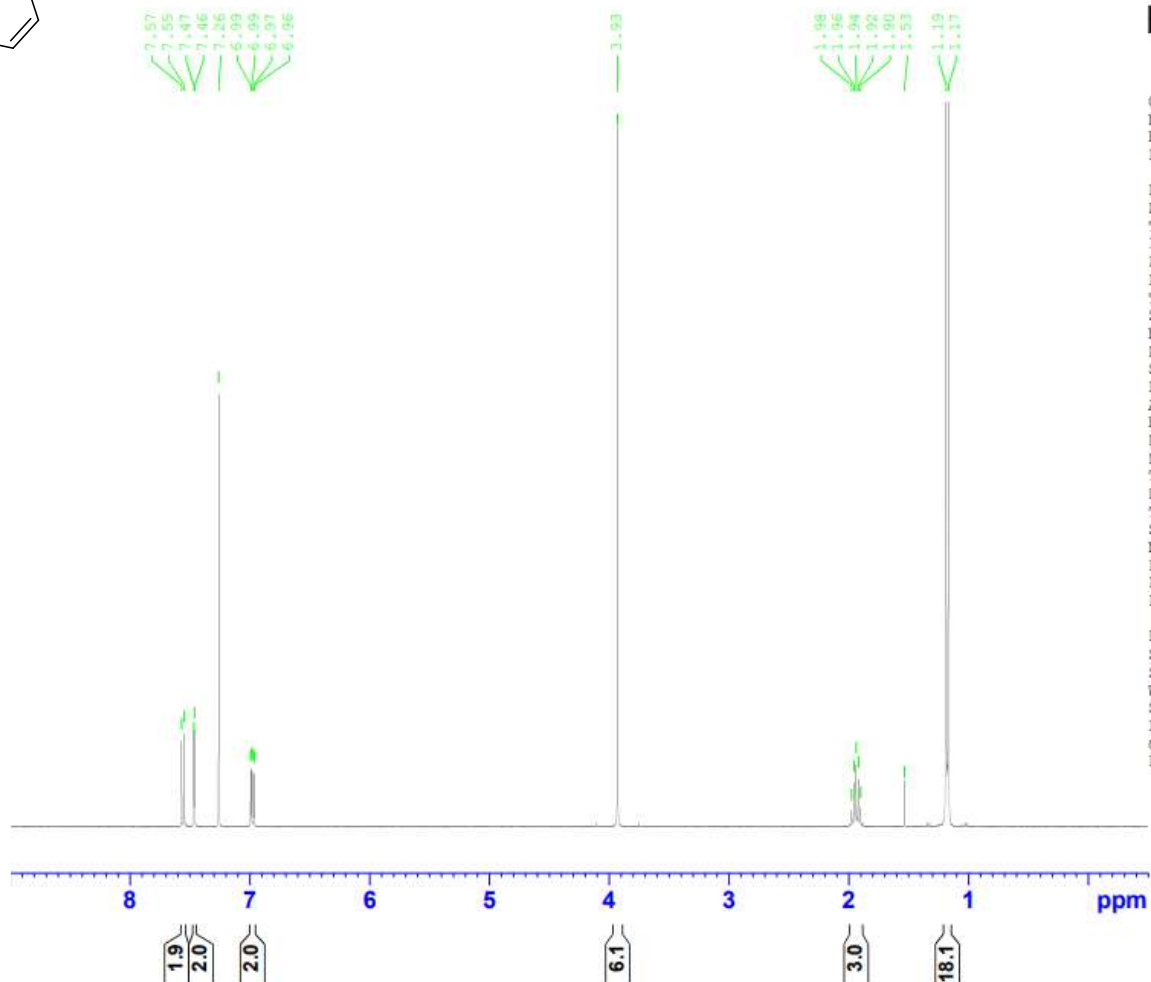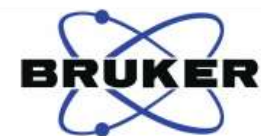

#### Current Data Parameters

NAME  
EXPNO 10  
PROCNO 1

#### F2 - Acquisition Parameters

Date\_ 20210326  
Time\_ 2.13 h  
INSTRUM AvanceNeo  
PROBHD 2116098 0793 (zg30)  
PULPROG zg30  
TD 65536  
SOLVENT CDCl<sub>3</sub>  
NS 4  
DS 0  
SWH 7142.857 Hz  
FIDRES 0.217983 Hz  
AQ 4.5875201 sec  
RG 101  
DW 70.000 usec  
DE 14.80 usec  
TE 298.0 K  
D1 2.00000000 sec  
TD0 1  
SFO1 400.1324008 MHz  
NUC1 1H  
P0 3.13 usec  
P1 9.40 usec  
PLW1 18.69700050 W

#### F2 - Processing parameters

SI 131072  
SF 400.1300097 MHz  
WDW EM  
SSB 0  
LB 0.10 Hz  
GB 0  
PC 1.00

### 3,6-Dimethoxy-9-(triisopropylsilyl)-9H-carbazole [24a]

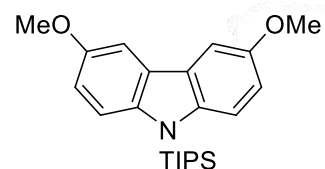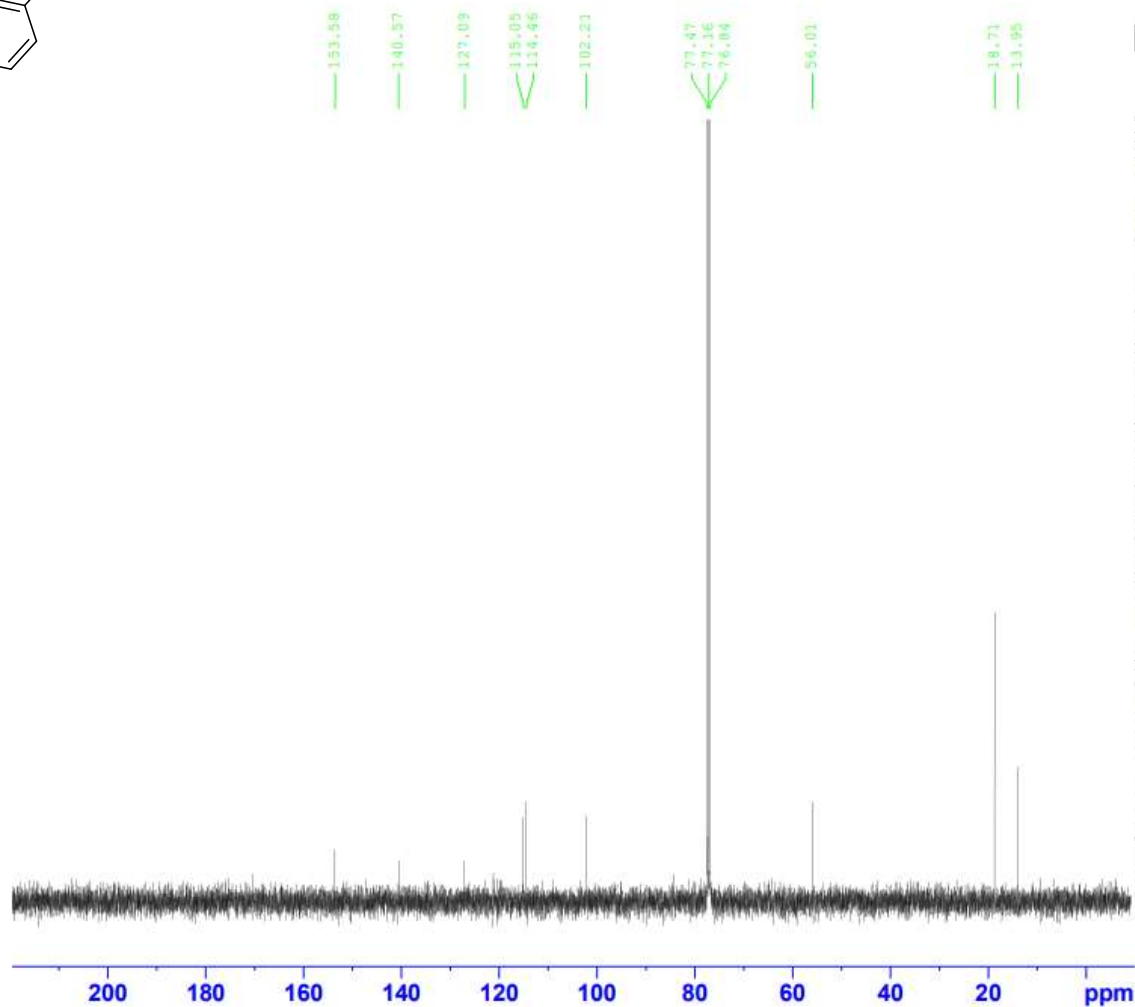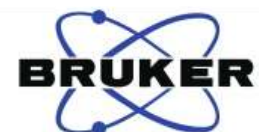

Current Data Parameters  
 NAME  
 EXPNO 11  
 PROCNO 1

F2 - Acquisition Parameters  
 Date\_ 20210326  
 Time\_ 2.43 h  
 INSTRUM AvanceNeo  
 PROBHD Z116098\_0793 (   
 PULPROG zgpg30  
 TD 119044  
 SOLVENT CDC13  
 NS 512  
 DS 0  
 SWH 25000.000 Hz  
 FIDRES 0.420013 Hz  
 AQ 2.3808801 sec  
 RG 9.375  
 DW 20.000 usec  
 DE 7.12 usec  
 TE 298.0 K  
 D1 1.00000000 sec  
 D11 0.03000000 sec  
 TD0 1  
 SFO1 100.6243390 MHz  
 NUC1 13C  
 P0 3.33 usec  
 P1 10.00 usec  
 PLW1 83.92700195 W  
 SFO2 400.1318006 MHz  
 NUC2 1H  
 CPDPRG[2] waltz64  
 PCPD2 90.00 usec  
 PLW2 18.69700050 W  
 PLW12 0.20396000 W  
 PLW13 0.10259000 W

F2 - Processing parameters  
 SI 131072  
 SF 100.6127548 MHz  
 WDW EM  
 SSB 0  
 LB 1.00 Hz  
 GB 0  
 PC 1.40

**1-Methoxy-8,8-dimethyl-4-(triisopropylsilyl)-4,8-dihydrosilolo[2,3,4,5-def]carbazole [25a]**

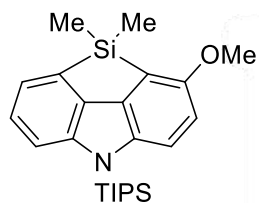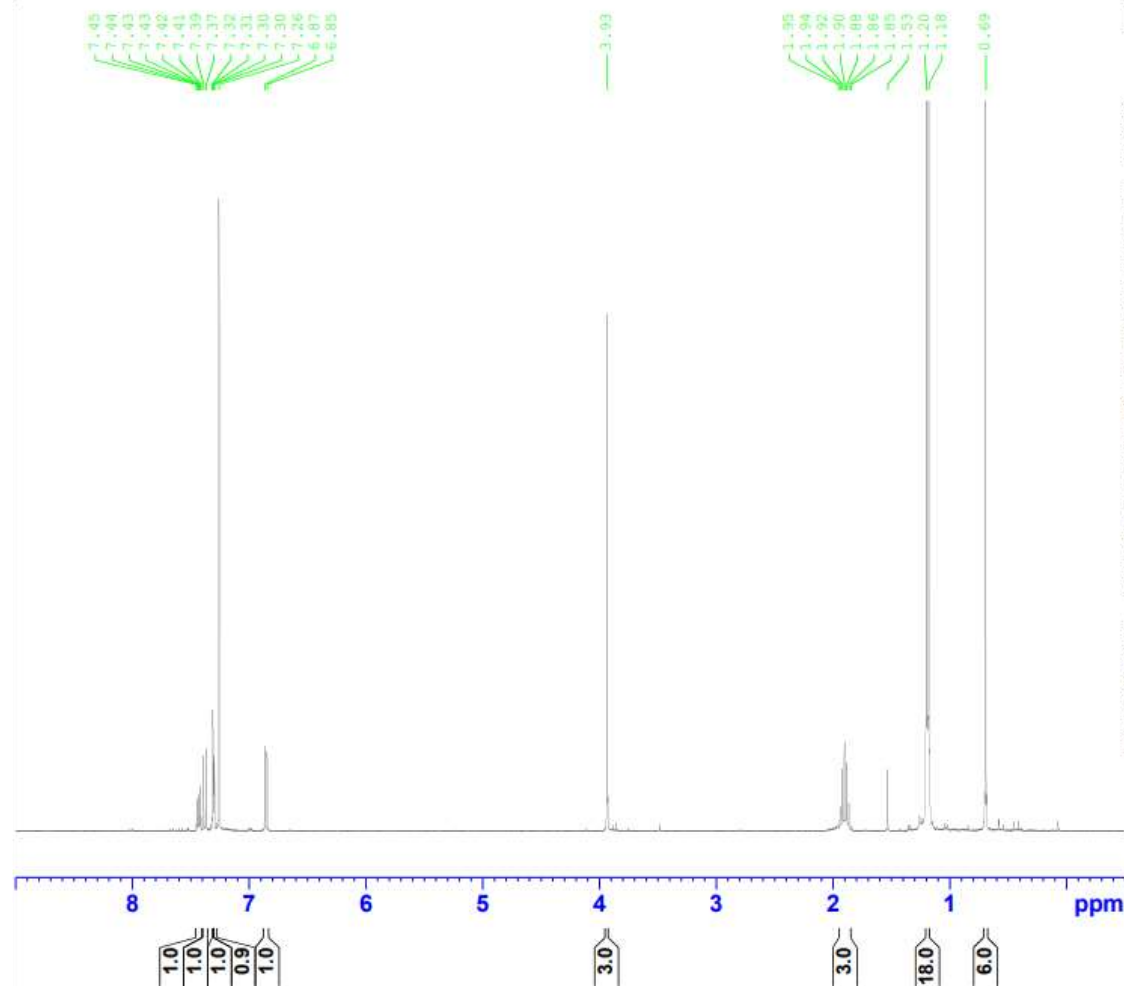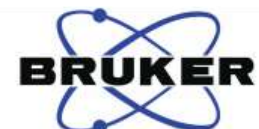

Current Data Parameters  
NAME  
EXPNO 12  
PROCNO 1

F2 - Acquisition Parameters  
Date 20210326  
Time 3.53 h  
INSTRUM AvanceNeo  
PROBHD Z116098\_0793 (   
PULPROG zg30  
TD 65536  
SOLVENT CDCl3  
NS 4  
DS 0  
SWH 7142.857 Hz  
FIDRES 0.217983 Hz  
AQ 4.5875201 sec  
RG 101  
DW 70.000 usec  
DE 14.80 usec  
TE 298.0 K  
D1 2.00000000 sec  
TD0 1  
SFO1 400.1324008 MHz  
NUC1 1H  
P0 3.13 usec  
P1 9.40 usec  
PLW1 18.69700050 W

F2 - Processing parameters  
SI 131072  
SF 400.1300102 MHz  
WDW EM  
SSB 0  
LB 0.10 Hz  
GB 0  
PC 1.00

**1-Methoxy-8,8-dimethyl-4-(triisopropylsilyl)-4,8-dihydrosilolo[2,3,4,5-def]carbazole [25a]**

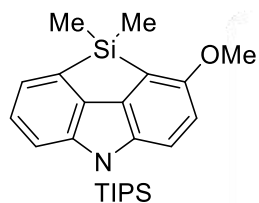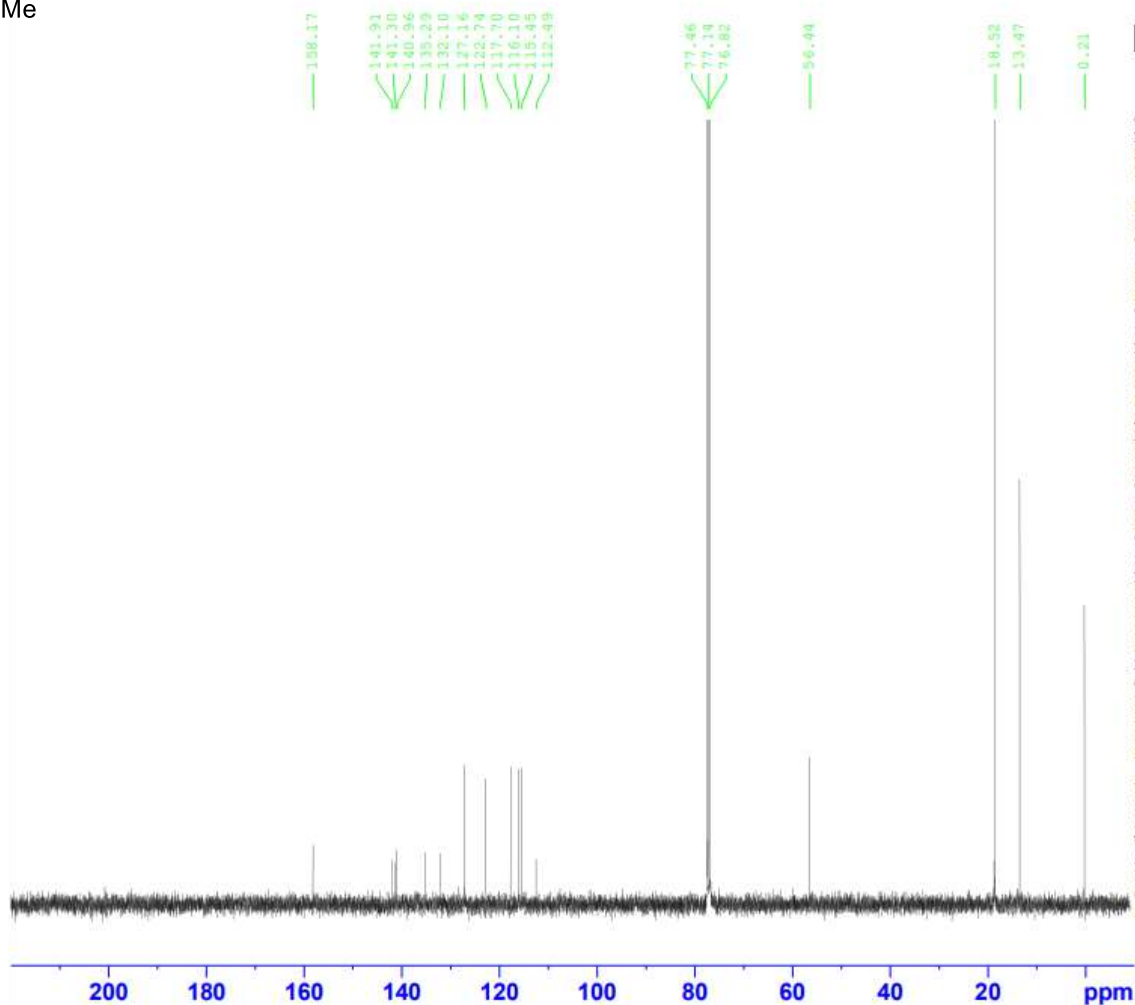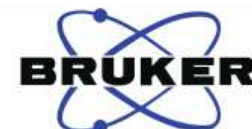

Current Data Parameters  
NAME  
EXPNO 11  
PROCNO 1

F2 - Acquisition Parameters  
Date\_ 20210325  
Time 6.36 h  
INSTRUM AvanceNeo  
PROBHD Z116098\_0793 (   
PULPROG zgpg30  
TD 119044  
SOLVENT CDC13  
NS 512  
DS 0  
SWH 25000.000 Hz  
FIDRES 0.420013 Hz  
AQ 2.3808801 sec  
RG 14.6484  
DW 20.000 usec  
DE 7.12 usec  
TE 298.0 K  
D1 1.00000000 sec  
D11 0.03000000 sec  
TD0 1  
SFO1 100.6243390 MHz  
NUC1 13C  
P0 3.33 usec  
P1 10.00 usec  
PLW1 83.92700195 W  
SFO2 400.1318006 MHz  
NUC2 1H  
CPDPRG[2 waltz64  
PCPD2 90.00 usec  
PLW2 18.69700050 W  
PLW12 0.20396000 W  
PLW13 0.10259000 W

F2 - Processing parameters  
SI 131072  
SF 100.6127572 MHz  
WDW EM  
SSB 0  
LB 1.00 Hz  
GB 0  
PC 1.40

**1,7-Dimethoxy-8,8-dimethyl-4-(triisopropylsilyl)-4,8-dihydrosilolo[2,3,4,5-def]carbazole [26a]**

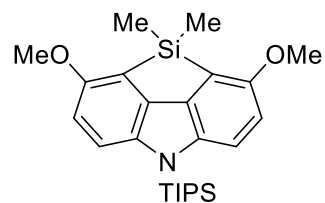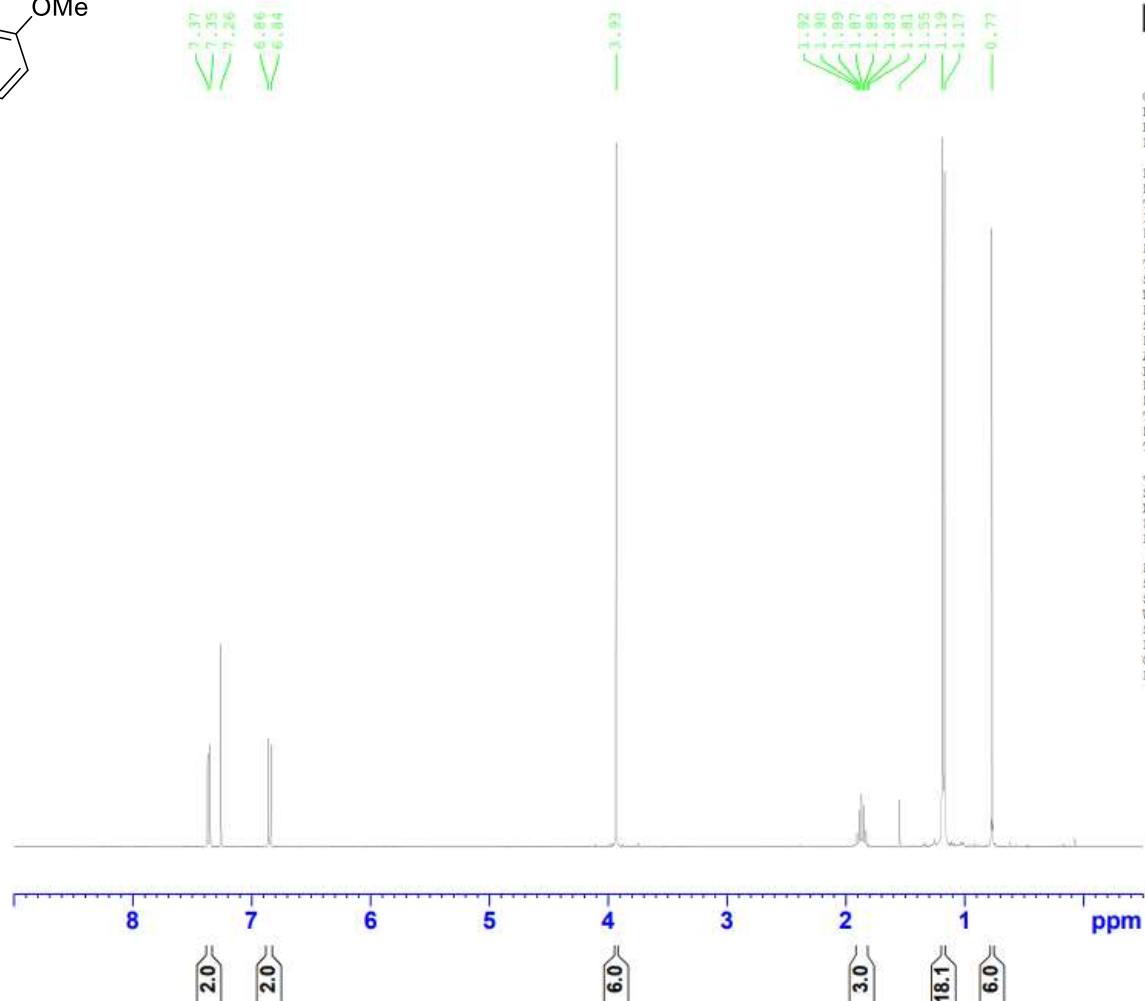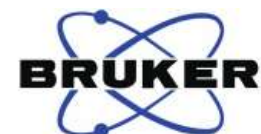

Current Data Parameters  
NAME  
EXPNO 11  
PROCNO 1

F2 - Acquisition Parameters  
Date\_ 20210430  
Time 5.16  
INSTRUM spect  
PROBHD 5 mm PADUL 13C  
PULPROG zg  
TD 32768  
SOLVENT CDCl<sub>3</sub>  
NS 64  
DS 2  
SWH 8223.685 Hz  
FIDRES 0.250967 Hz  
AQ 1.9922944 sec  
RG 203  
DW 60.800 usec  
DE 11.93 usec  
TE 294.3 K  
D1 15.00000000 sec  
TD0 1

===== CHANNEL f1 =====  
SFO1 400.1324008 MHz  
NUC1 1H  
P1 11.06 usec  
PLW1 24.29199982 W

F2 - Processing parameters  
SI 32768  
SF 400.1300103 MHz  
WDW EM  
SSB 0  
LB 0.30 Hz  
GB 0  
PC 1.00

**1,7-Dimethoxy-8,8-dimethyl-4-(triisopropylsilyl)-4,8-dihydrosilolo[2,3,4,5-def]carbazole [26a]**

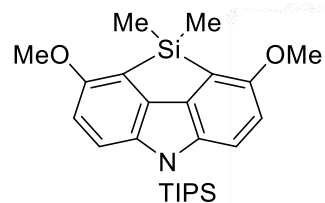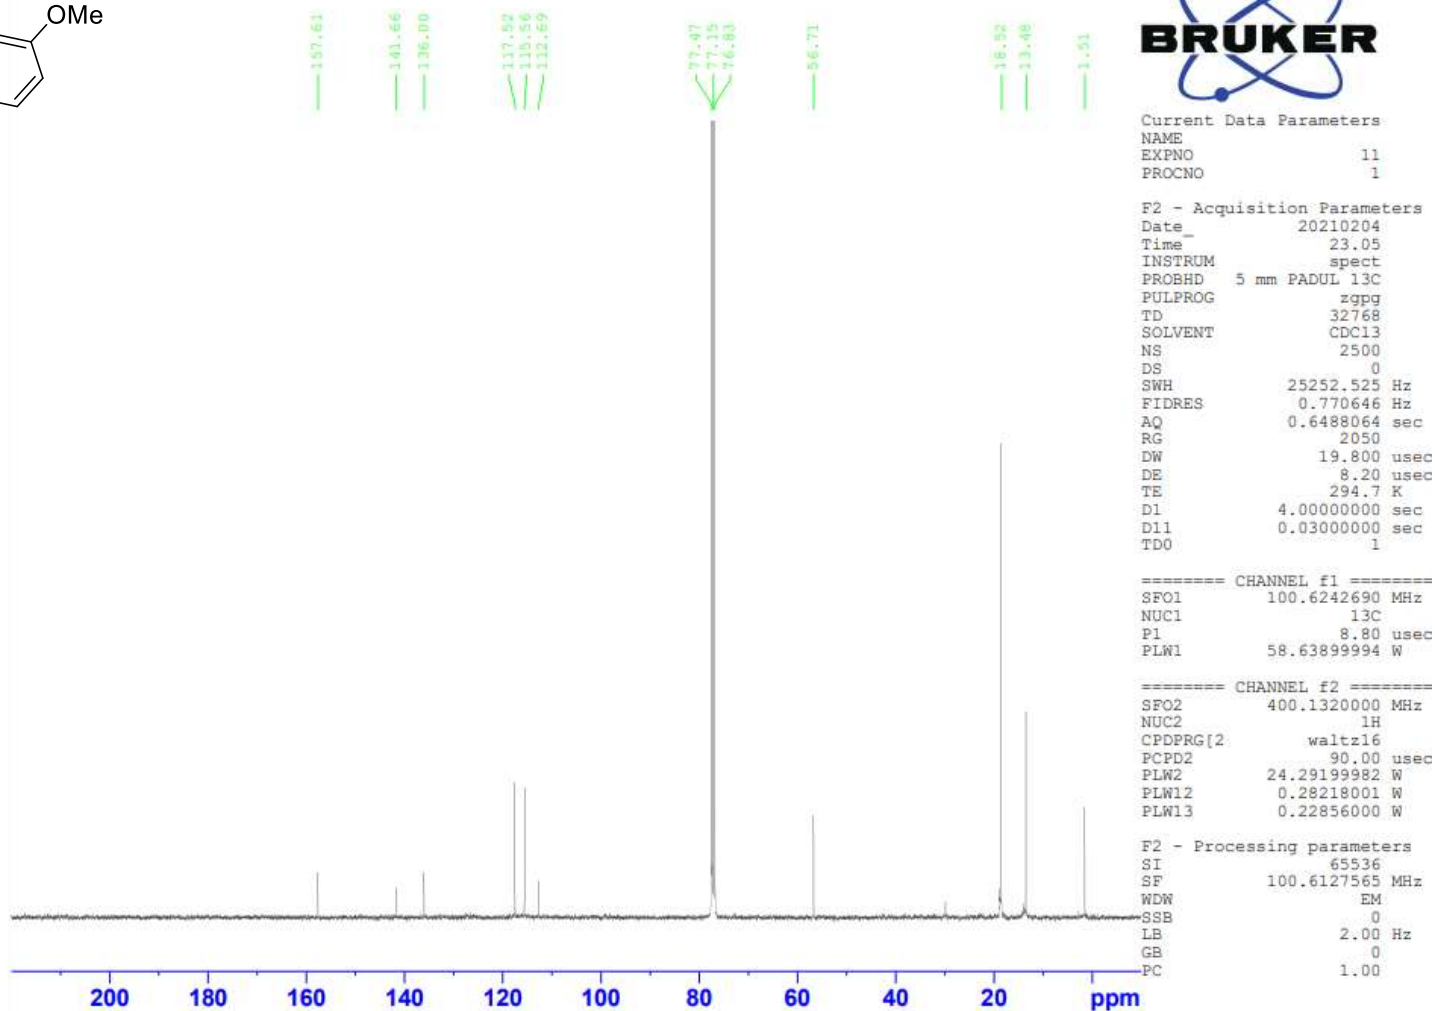

# 2-Methoxy-9-(triisopropylsilyl)-9H-carbazole [27a]

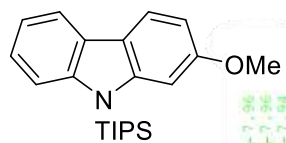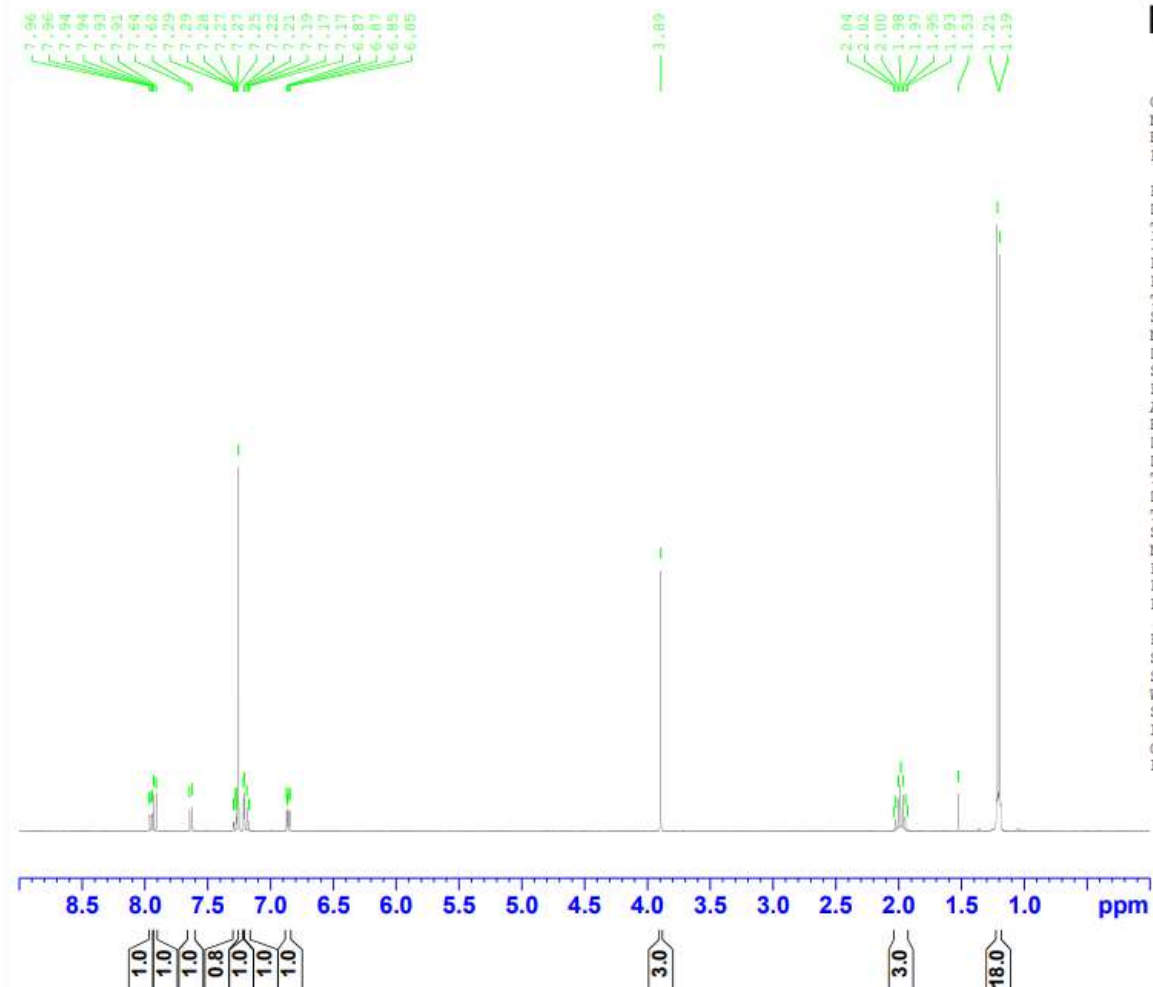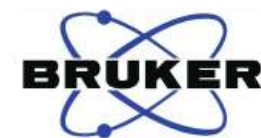

## Current Data Parameters

NAME  
EXPNO 11  
PROCNO 1

## F2 - Acquisition Parameters

Date\_ 20210326  
Time\_ 2.09 h  
INSTRUM AvanceNeo  
PROBHD Z116098\_0793 (  
PULPROG zg30  
TD 65536  
SOLVENT CDCl3  
NS 4  
DS 0  
SWH 7142.857 Hz  
FIDRES 0.217983 Hz  
AQ 4.5875201 sec  
RG 101  
DW 70.000 usec  
DE 14.80 usec  
TE 298.0 K  
D1 2.00000000 sec  
TD0 1  
SFO1 400.1324008 MHz  
NUC1 1H  
P0 3.13 usec  
P1 9.40 usec  
PLW1 18.69700050 W

## F2 - Processing parameters

SI 131072  
SF 400.1300116 MHz  
WDW EM  
SSB 0  
LB 0.10 Hz  
GB 0  
PC 1.00

## 2-Methoxy-9-(triisopropylsilyl)-9H-carbazole [27a]

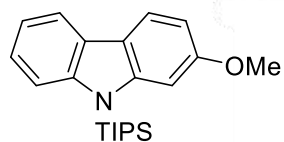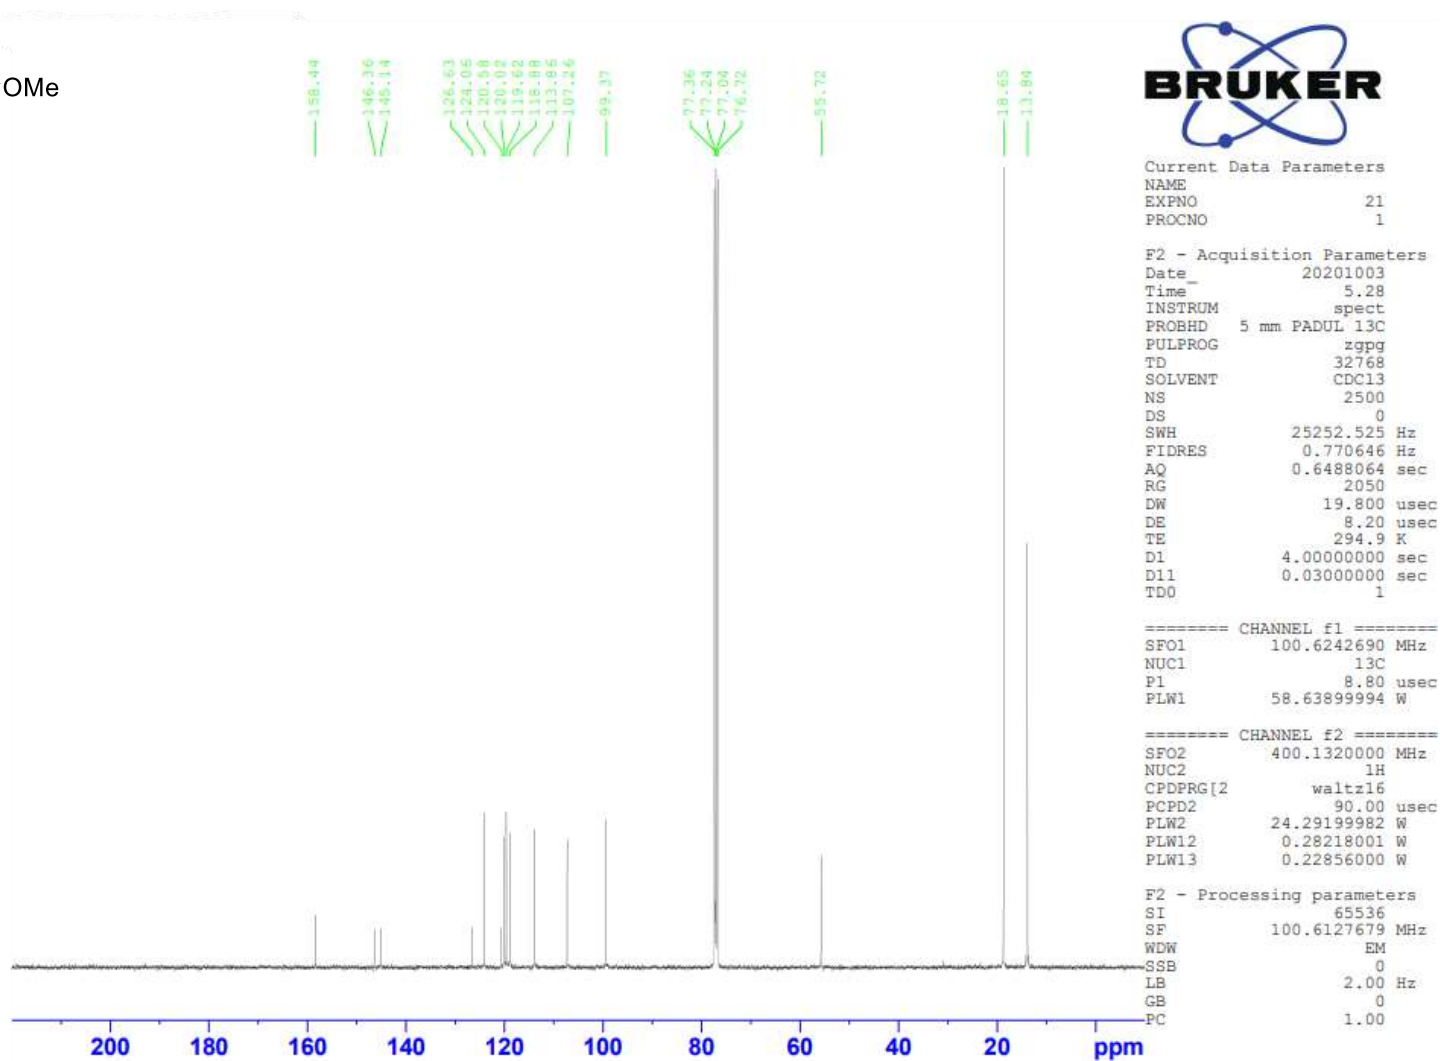

## 2-Methoxy-1-(triisopropylsilyl)-9H-carbazole [28]

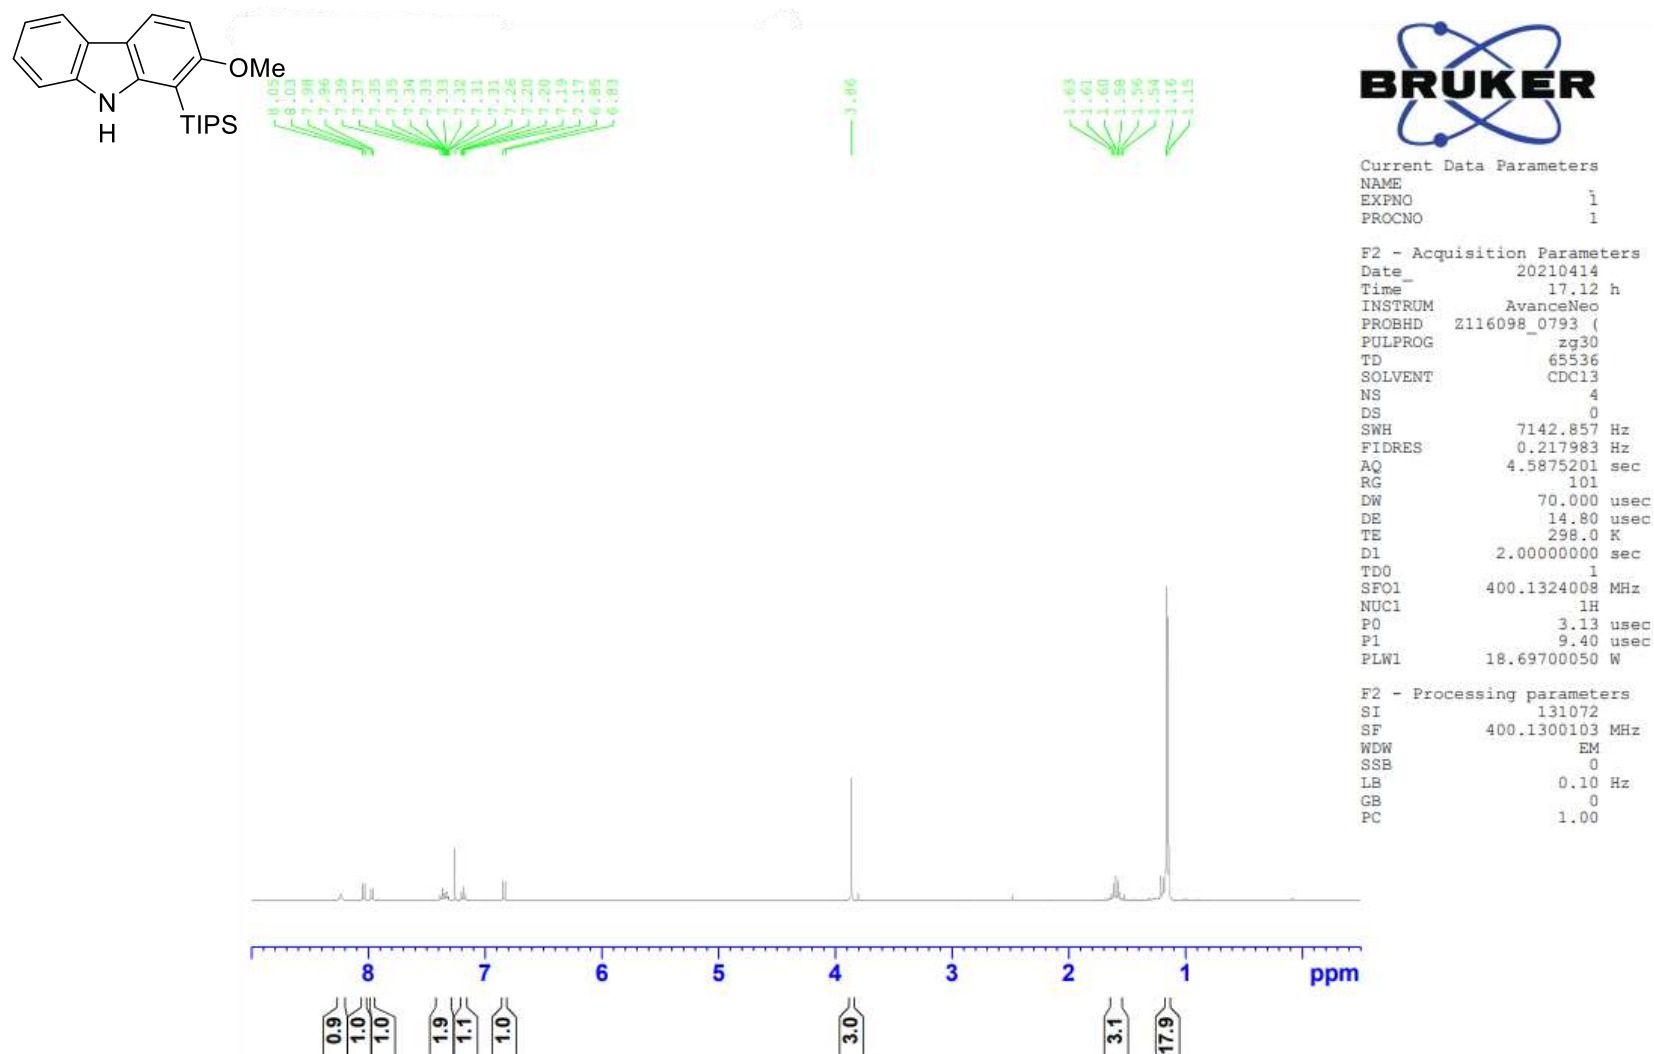

## 2-Methoxy-1-(triisopropylsilyl)-9H-carbazole [28]

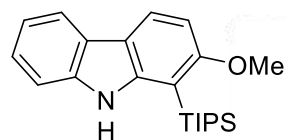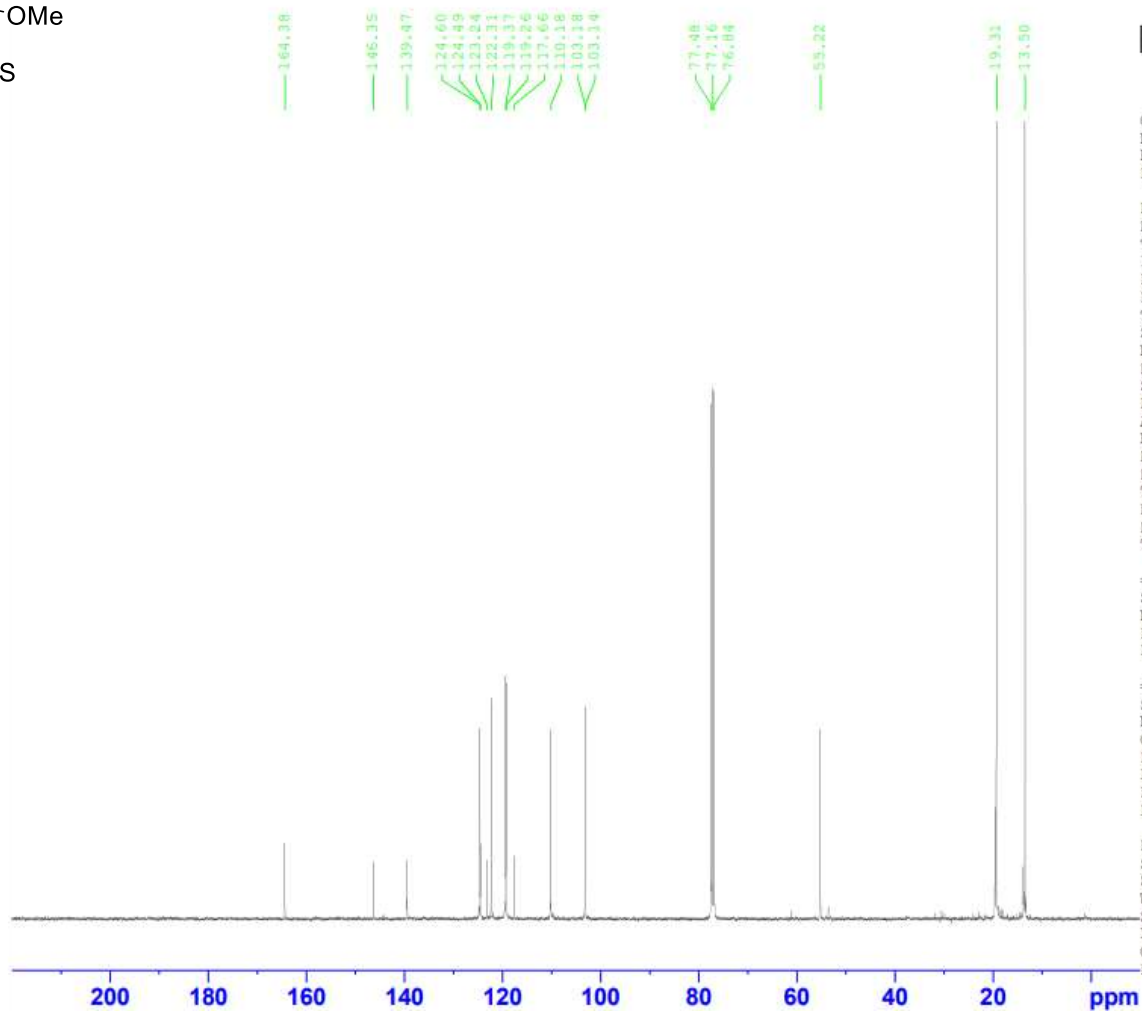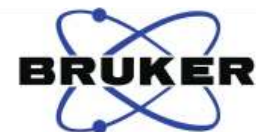

### Current Data Parameters

NAME  
EXPNO 11  
PROCNO 1

### F2 - Acquisition Parameters

Date\_ 20210210  
Time\_ 22.49  
INSTRUM spect  
PROBHD 5 mm PADUL 13C  
PULPROG zgpg  
TD 32768  
SOLVENT CDC13  
NS 2500  
DS 0  
SWH 25252.525 Hz  
FIDRES 0.770646 Hz  
AQ 0.6488064 sec  
RG 2050  
DW 19.800 usec  
DE 8.20 usec  
TE 295.7 K  
D1 4.00000000 sec  
D11 0.03000000 sec  
TD0 1

### ===== CHANNEL f1 =====

SFO1 100.6242690 MHz  
NUC1 13C  
P1 8.80 usec  
PLW1 58.63899994 W

### ===== CHANNEL f2 =====

SFO2 400.1320000 MHz  
NUC2 1H  
CPDPRG[2] waltz16  
PCPD2 90.00 usec  
PLW2 24.29199982 W  
PLW12 0.28218001 W  
PLW13 0.22856000 W

### F2 - Processing parameters

SI 65536  
SF 100.6127571 MHz  
WDW EM  
SSB 0  
LB 2.00 Hz  
GB 0  
PC 1.00

9-(Triisopropylsilyl)-9H-carbazol-2-ol [29]

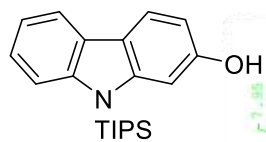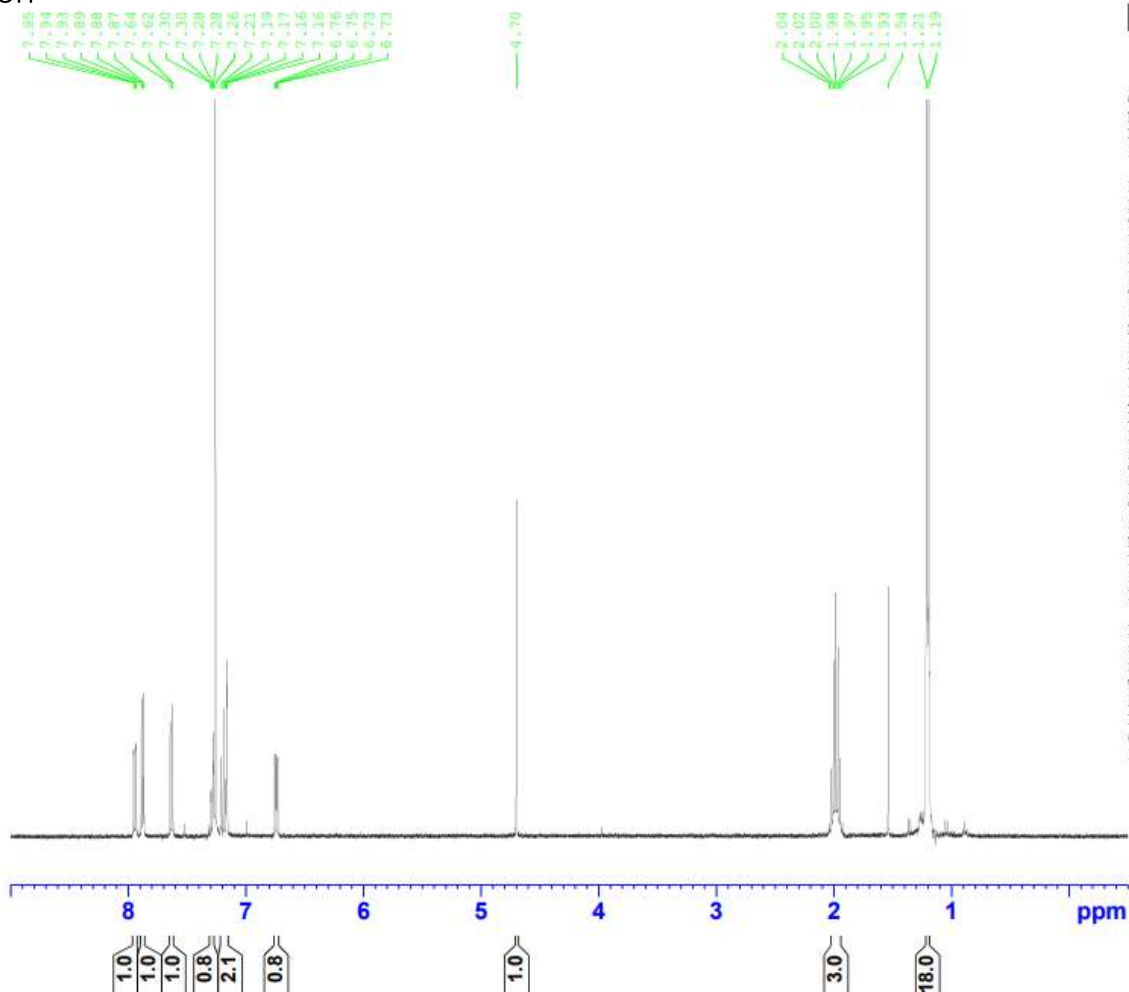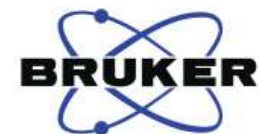

Current Data Parameters

NAME  
EXPNO 1  
PROCNO 1

F2 - Acquisition Parameters

Date\_ 20210414  
Time 17.16 h  
INSTRUM AvanceNeo  
PROBHD Z116098\_0793 (   
PULPROG zg30  
TD 65536  
SOLVENT CDCl3  
NS 4  
DS 0  
SWH 7142.857 Hz  
FIDRES 0.217983 Hz  
AQ 4.5875201 sec  
RG 101  
DW 70.000 usec  
DE 14.80 usec  
TE 298.0 K  
D1 2.00000000 sec  
TD0 1  
SFO1 400.1324008 MHz  
NUC1 1H  
P0 3.13 usec  
P1 9.40 usec  
PLW1 18.69700050 W

F2 - Processing parameters

SI 131072  
SF 400.1300096 MHz  
WDW EM  
SSB 0  
LB 0.10 Hz  
GB 0  
PC 1.00

9-(Triisopropylsilyl)-9H-carbazol-2-ol [29]

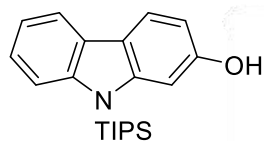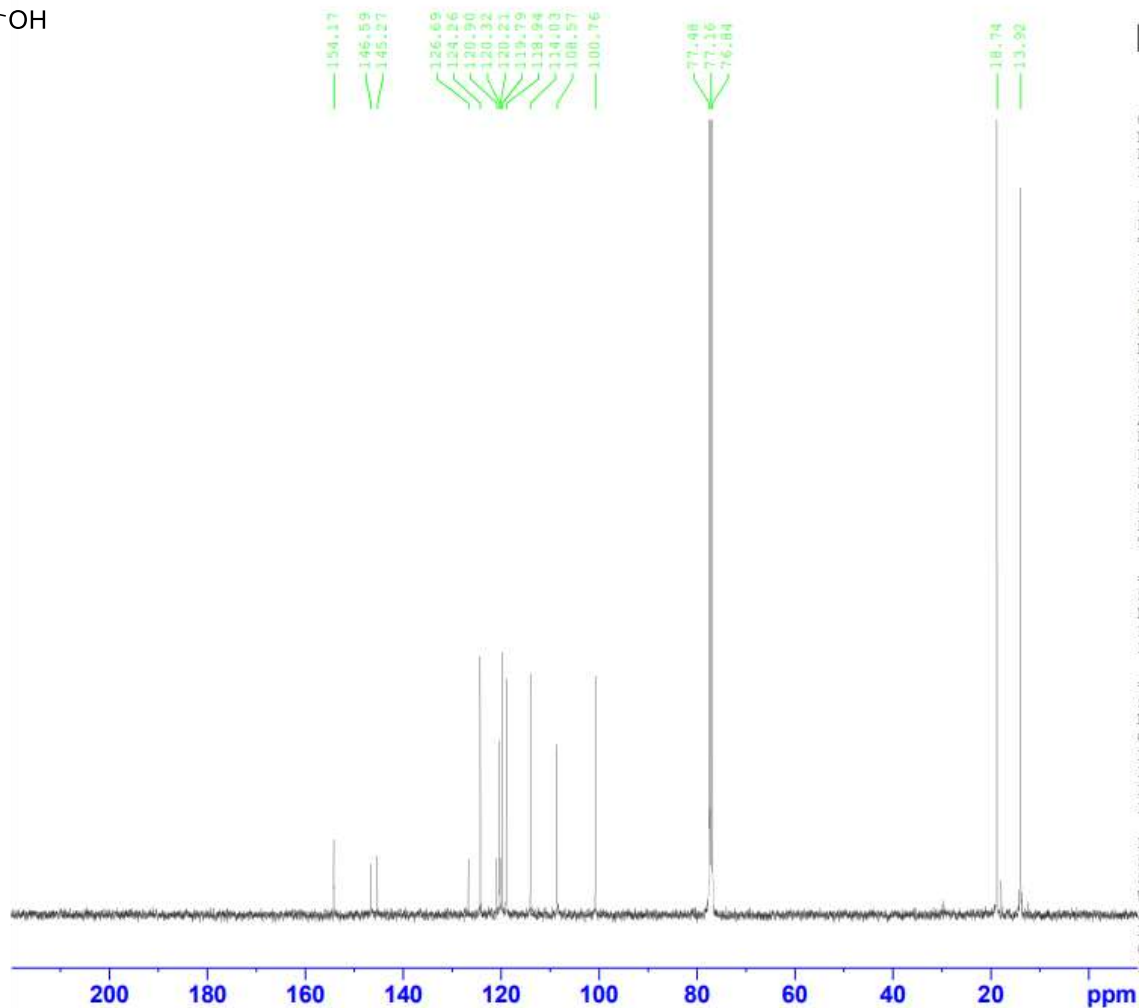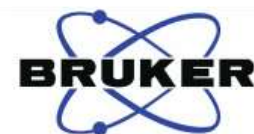

Current Data Parameters  
NAME  
EXPNO 21  
PROCNO 1

F2 - Acquisition Parameters  
Date\_ 20210211  
Time 5.31  
INSTRUM spect  
PROBHD 5 mm PADUL 13C  
PULPROG zgpg  
TD 32768  
SOLVENT CDCl<sub>3</sub>  
NS 2500  
DS 0  
SWH 25252.525 Hz  
FIDRES 0.770646 Hz  
AQ 0.6488064 sec  
RG 2050  
DW 19.800 usec  
DE 8.20 usec  
TE 295.1 K  
D1 4.00000000 sec  
D11 0.03000000 sec  
TD0 1

===== CHANNEL f1 =====  
SFO1 100.6242690 MHz  
NUC1 13C  
P1 8.80 usec  
PLW1 58.63899994 W

===== CHANNEL f2 =====  
SFO2 400.1320000 MHz  
NUC2 1H  
CPDPRG[2] waltz16  
PCPD2 90.00 usec  
PLW2 24.29199982 W  
PLW12 0.28218001 W  
PLW13 0.22856000 W

F2 - Processing parameters  
SI 65536  
SF 100.6127558 MHz  
WDW EM  
SSB 0  
LB 2.00 Hz  
GB 0  
PC 1.00

## References

- <sup>1</sup> Burchat, A. F.; Chong, J. M.; Nielsen, N. Titration of alkylolithiums with a simple reagent to a blue endpoint. *J. Organomet. Chem.* **1997**, *542*, 281–283.
- <sup>2</sup> Feng, Y.; Holte, D.; Zoller, J.; Umemiya, S.; Simke, L. R.; Baran, P. S. Total Synthesis of Verruculogen and Fumitremorgin A Enabled by Ligand-Controlled C–H Borylation. *J. Am. Chem. Soc.* **2015**, *137*, 10160–10163.
- <sup>3</sup> Greb, L.; Tamke, S.; Paradies, J. Catalytic metal-free Si–N cross-dehydrocoupling. *Chem. Commun.* **2014**, *50*, 2318–2320.
- <sup>4</sup> a. Zi, Y.; Lange, M.; Schultz, C.; Vilotijevic, I. Latent Nucleophiles in Lewis Base Catalyzed Enantioselective N-Allylations of N-Heterocycles. *Angew. Chem. Int. Ed.* **2019**, *58*, 10727–10731; b. Lange, M.; Zi, Y.; Vilotijevic, I. Enantioselective Synthesis of Pyrrolizin-1-ones via Lewis Base Catalyzed N-Allylation of N-Silyl Pyrrole Latent Nucleophiles. *J. Org. Chem.* **2020**, *85*, 1259–1269.
- <sup>5</sup> Wang, M.; Fan, Q.; Jiang, X. Nitrogen–Iodine Exchange of Diaryliodonium Salts: Access to Acridine and Carbazole. *Org. Lett.* **2018**, *20*, 216–219.
- <sup>6</sup> Lawrence, K.; Flower, S. E.; Kociok-Kohn, G.; Frost, C. G.; James, T. D. A simple and effective colorimetric technique for the detection of boronic acids and their derivatives. *Anal. Methods* **2012**, *4*, 2215–2217.
- <sup>7</sup> Brütting, C.; Hesse, R.; Jäger, A.; Kataeva, O.; Schmidt, A. W.; Knölker, H.-J. Synthesis of Glycoborine, Glybomine A and B, the Phytoalexin Carballexin A and the  $\beta$ -Adrenoreceptor Antagonists Carazolol and Carvedilol. *Chem. Eur. J.* **2016**, *22*, 16897–16911.
- <sup>8</sup> Kuhnert, N.; Rossignolo, G. M.; Lopez-Periagosa, A. The synthesis of trianglimines: on the scope and limitations of the [3 + 3] cyclocondensation reaction between (1*R*,2*R*)-diaminocyclohexane and aromatic dicarboxaldehydes. *Org. Biomol. Chem.* **2003**, *1*, 1157–1170.
- <sup>9</sup> Dakdouki, S. C.; Villemin, D.; Bar, N. An Original On-Column Oxidative Cleavage of Vicinal Diols Using Alumina/Potassium Periodate: Application to Sequential Oxidation/Horner–Emmons Reactions. *Eur. J. Org. Chem.* **2011**, 4448–4454.
- <sup>10</sup> Song, X.; Yu, H.; Zhang, Y.; Miao, Y.; Ye, K.; Wang, Y. Controllable morphology and self-assembly of one-dimensional luminescent crystals based on alkyl-fluoro-substituted dithienophenazines. *CrystEngComm* **2018**, *20*, 1669–1678.
- <sup>11</sup> Cowie, B. E.; Emslie, D. J. H. Platinum Complexes of a Borane-Appended Analogue of 1,1'-Bis(diphenylphosphino)ferrocene: Flexible Borane Coordination Modes and in situ Vinylborane Formation. *Chem. Eur. J.* **2014**, *20*, 16899–16912.
- <sup>12</sup> Thiede, S.; Winterscheid, P. E.; Hartmann, J.; Schnakenburg, G.; Essig, S.; Menche, D. Regiodivergent Iodocyclizations for the Highly Diastereoselective Synthesis of *syn*- and *anti*-Hydroxyl-Isochromanones and -Isobenzofuranones: Concise Synthesis of the Isochromanone Core of the Ajudazols. *Synthesis* **2016**, *48*, 697–709.
- <sup>13</sup> Raja, K.; Mughesh, G. Remarkable Effect of Chalcogen Substitution on an Enzyme Mimetic for Deiodination of Thyroid Hormones. *Angew. Chem. Int. Ed.* **2015**, *54*, 7674–7678.
- <sup>14</sup> Verkruijsse, H. D.; Brandsma, L. Carbophilic versus thiophilic attack in the reaction of metallated aromates and heteroaromates with carbon disulfide. *J. Organomet. Chem.* **1987**, *332*, 95–98.
- <sup>15</sup> Schlosser, M.; Jenny, T.; Guggisberg, Y. Monomeric Formaldehyde in Ethereal Solution. *Synlett* **1990**, 704.
- <sup>16</sup> Lenormand, H.; Goddard, J.-P.; Fensterbank, L. Spirosilane Derivatives as Fluoride Sensors. *Org. Lett.* **2013**, *15*, 4, 748–751.
- <sup>17</sup> Becker, B.; Corriu, R. J. P.; Henner, B. J. L.; Wojnowski, W.; Peters, K.; von Schnering, H. G.; Contributions to the chemistry of silicon-sulphur compounds: XLII. Bis(1-methyldibenzosilole)sulphide: its synthesis, crystal structure, and reaction with chromium hexacarbonyl. *J. Organomet. Chem.* **1986**, *312*, 305–311.
- <sup>18</sup> Daiyo, T.; Makoto, N.; Eiji, M.; Hiroyuki, N. Silaethene in Pyrolysis of Spiro[silacyclobutane-1-9'-[9H-9]silafuorene]. *Bull. Chem. Soc. Jpn.* **1987**, *60*, 2263–2264.
- <sup>19</sup> Oukhrib, A.; Bonnafox, L.; Panossian, A.; Waifang, S.; Nguyen, D. H.; Urrutigoity, M.; Colobert, F.; Gouygou, M.; Leroux, F. R. Novel C<sub>1</sub>-symmetric dibenzophosphole ligands: application in hydroformylation reactions. *Tetrahedron* **2014**, *70*, 1431–1436.
- <sup>20</sup> Kaga, A.; Iida, H.; Tsuchiya, S.; Saito, H.; Nakano, K.; Yorimitsu, H. Aromatic Metamorphosis of Thiophenes by Means of Desulfurative Dilithiation. *Chem. Eur. J.* **2021**, *27*, 4567–4572.
- <sup>21</sup> Romero, P. E.; Piers, W. E.; Decker, S. A.; Chau, D.; Woo, T. K.; Parvez, M.  $\eta^1$  versus  $\eta^5$  Bonding Modes in Cp\*Al(I) Adducts of 9-Borafluorenes. *Organometallics* **2003**, *22*, 6, 1266–1274.

- 
- <sup>22</sup> Davis, F. A.; Han, W.; Murphy, C. K. Selective, Electrophilic Fluorinations Using N-Fluoro-o-benzenedisulfonimide. *J. Org. Chem.* **1995**, *60*, 4730–4737.
- <sup>23</sup> Bellan, A. B.; Knochel, P. Steric-Hindrance Triggered Remote Lithiations of Bulky Silyl-Substituted Arenes. *Synthesis* **2019**, *51*, 3536–3544.
- <sup>24</sup> Li, F.; Wei, G.; Sheng, Y.; Quan, Y.; Cheng, Y.; Zhu, C. (S)-Binaphthalene-based fluorescence polymer sensors for direct and visual F<sup>−</sup>-detection. *Polymer* **2014**, *55*, 5689–5694.
- <sup>25</sup> Palumbo, G.; Ferreri, C.; D'Ambrosio, C.; Caputo, R. Thiosulfonic S-Esters-III. A Convenient Preparation of Aromatic Sulfides. *Phosphorus and Sulfur and the Related Elements* **1984**, *19*, 235–238.
- <sup>26</sup> Wang, H.; Gabbaï, F. P. Synthesis and Reactivity of a Chlorinated 1,8-Bis(diarylmethyl)naphthalenediyl Dication. *Org. Lett.* **2005**, *7*, 283–285.
- <sup>27</sup> Getmanenko, Y. A.; Risko, C.; Tongwa, P.; Kim, E.-G.; Li, H.; Sandhu, B.; Timofeeva, T.; Brédas, J.-L.; Marder, S. R. Mono- and Dicarbonyl-Bridged Tricyclic Heterocyclic Acceptors: Synthesis and Electronic Properties. *J. Org. Chem.* **2011**, *76*, 2660–2671.
- <sup>28</sup> For discussion of the directing effects of OMe groups in BuLi-TMEDA-mediated deprotonations of aromatics, see: Chadwick, S. T.; Rennels, R. A.; Rutherford, J. L.; Collum, D. B. Are *n*-BuLi/TMEDA-Mediated Arene Ortholithiations Directed? Substituent-Dependent Rates, Substituent-Independent Mechanisms. *J. Am. Chem. Soc.* **2000**, *122*, 8640–8647.
- <sup>29</sup> CrysAlisPro, Rigaku Oxford Diffraction, 2015.
- <sup>30</sup> Sheldrick, G. M. *SHELXT* - Integrated space-group and crystal-structure determination. *Acta Cryst.* **2015**, *A71*, 3–8.
- <sup>31</sup> Sheldrick, G. M. Crystal structure refinement with SHELXL. *Acta Cryst.* **2015**, *C71*, 3–8.
- <sup>32</sup> Dolomanov, O. V.; Bourhis, L. J.; Gildea, R. J.; Howard, J. A. K.; Puschmann, H. OLEX2: a complete structure solution, refinement and analysis program. *J. Appl. Crystallogr.* **2009**, *42*, 339–341.
